# Supplementary material for: Fidelity assessment of nurse-led non-pharmacological package of care for knee pain in the package development phase of a feasibility randomised controlled trial based in secondary care: a mixed methods study
Source: PubMed Central journal article supplement — BMJ Open. 2021 Jul 29;11(7):e045242. doi: 10.1136/bmjopen-2020-045242 (PMC8323379; doi:10.1136/bmjopen-2020-045242), 2021-07-29
Supplement: bmjopen-2020-045242.draft_revisions.pdf [file bmjopen-2020-045242.draft_revisions.pdf]

# BMJ Open

BMJ Open is committed to open peer review. As part of this commitment we make the peer review history of every article we publish publicly available.

When an article is published we post the peer reviewers' comments and the authors' responses online. We also post the versions of the paper that were used during peer review. These are the versions that the peer review comments apply to.

The versions of the paper that follow are the versions that were submitted during the peer review process. They are not the versions of record or the final published versions. They should not be cited or distributed as the published version of this manuscript.

BMJ Open is an open access journal and the full, final, typeset and author-corrected version of record of the manuscript is available on our site with no access controls, subscription charges or pay-per-view fees (<http://bmjopen.bmj.com>).

If you have any questions on BMJ Open's open peer review process please email [info.bmjopen@bmj.com](mailto:info.bmjopen@bmj.com)

# BMJ Open

## Assessing intervention fidelity of a nurse-led non-pharmacological package of care for knee pain.

|                               |                                                                                                                                                                                                                                                                                                                                                                                                                                                                                                                                                                                                                                                                                                                                                                                                                                                                                                                                                                                                                                                                                                                                                                                                                                                                                                                                                                                  |
|-------------------------------|----------------------------------------------------------------------------------------------------------------------------------------------------------------------------------------------------------------------------------------------------------------------------------------------------------------------------------------------------------------------------------------------------------------------------------------------------------------------------------------------------------------------------------------------------------------------------------------------------------------------------------------------------------------------------------------------------------------------------------------------------------------------------------------------------------------------------------------------------------------------------------------------------------------------------------------------------------------------------------------------------------------------------------------------------------------------------------------------------------------------------------------------------------------------------------------------------------------------------------------------------------------------------------------------------------------------------------------------------------------------------------|
| Journal:                      | <i>BMJ Open</i>                                                                                                                                                                                                                                                                                                                                                                                                                                                                                                                                                                                                                                                                                                                                                                                                                                                                                                                                                                                                                                                                                                                                                                                                                                                                                                                                                                  |
| Manuscript ID                 | bmjopen-2020-045242                                                                                                                                                                                                                                                                                                                                                                                                                                                                                                                                                                                                                                                                                                                                                                                                                                                                                                                                                                                                                                                                                                                                                                                                                                                                                                                                                              |
| Article Type:                 | Original research                                                                                                                                                                                                                                                                                                                                                                                                                                                                                                                                                                                                                                                                                                                                                                                                                                                                                                                                                                                                                                                                                                                                                                                                                                                                                                                                                                |
| Date Submitted by the Author: | 28-Sep-2020                                                                                                                                                                                                                                                                                                                                                                                                                                                                                                                                                                                                                                                                                                                                                                                                                                                                                                                                                                                                                                                                                                                                                                                                                                                                                                                                                                      |
| Complete List of Authors:     | Nomikos, Polykarpos; University of Nottingham, Academic Rheumatology ; University of Nottingham, NIHR Nottingham Biomedical Research Centre<br>Hall, Michelle; University of Nottingham, NIHR Nottingham Biomedical Research Centre ; University of Nottingham, School of Health Sciences<br>Fuller, Amy; University of Nottingham, Academic Rheumatology ; University of Nottingham, NIHR Nottingham Biomedical Research Centre<br>Millar, Bonnie; University of Nottingham, NIHR Nottingham Biomedical Research Centre ; University of Nottingham, Pain Centre Versus Arthritis<br>Ogollah, Reuben; University of Nottingham, Nottingham Clinical Trials Unit<br>Valdes, A; University of Nottingham, NIHR Nottingham Biomedical Research Centre ; University of Nottingham, Pain Centre Versus Arthritis<br>Doherty, Michael ; University of Nottingham, Academic Rheumatology ; University of Nottingham, Pain Centre Versus Arthritis<br>Walsh, David; University of Nottingham, NIHR Nottingham Biomedical Research Centre ; University of Nottingham, Pain Centre Versus Arthritis<br>dasNair, Roshan; University of Nottingham, Institute of Mental Health; University of Nottingham, Division of Psychiatry & Applied Psychology<br>Abhishek, A; University of Nottingham, Academic Rheumatology ; University of Nottingham, NIHR Nottingham Biomedical Research Centre |
| Keywords:                     | Knee < ORTHOPAEDIC & TRAUMA SURGERY, Rheumatology < INTERNAL MEDICINE, Musculoskeletal disorders < ORTHOPAEDIC & TRAUMA SURGERY                                                                                                                                                                                                                                                                                                                                                                                                                                                                                                                                                                                                                                                                                                                                                                                                                                                                                                                                                                                                                                                                                                                                                                                                                                                  |
|                               |                                                                                                                                                                                                                                                                                                                                                                                                                                                                                                                                                                                                                                                                                                                                                                                                                                                                                                                                                                                                                                                                                                                                                                                                                                                                                                                                                                                  |

SCHOLARONE™  
Manuscripts

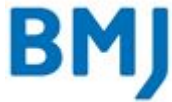

I, the Submitting Author has the right to grant and does grant on behalf of all authors of the Work (as defined in the below author licence), an exclusive licence and/or a non-exclusive licence for contributions from authors who are: i) UK Crown employees; ii) where BMJ has agreed a CC-BY licence shall apply, and/or iii) in accordance with the terms applicable for US Federal Government officers or employees acting as part of their official duties; on a worldwide, perpetual, irrevocable, royalty-free basis to BMJ Publishing Group Ltd ("BMJ") its licensees and where the relevant Journal is co-owned by BMJ to the co-owners of the Journal, to publish the Work in this journal and any other BMJ products and to exploit all rights, as set out in our [licence](#).

The Submitting Author accepts and understands that any supply made under these terms is made by BMJ to the Submitting Author unless you are acting as an employee on behalf of your employer or a postgraduate student of an affiliated institution which is paying any applicable article publishing charge ("APC") for Open Access articles. Where the Submitting Author wishes to make the Work available on an Open Access basis (and intends to pay the relevant APC), the terms of reuse of such Open Access shall be governed by a Creative Commons licence – details of these licences and which [Creative Commons](#) licence will apply to this Work are set out in our licence referred to above.

Other than as permitted in any relevant BMJ Author's Self Archiving Policies, I confirm this Work has not been accepted for publication elsewhere, is not being considered for publication elsewhere and does not duplicate material already published. I confirm all authors consent to publication of this Work and authorise the granting of this licence.

1  
2  
3  
4 Assessing intervention fidelity of a nurse-led non-pharmacological package of care  
5 for knee pain  
6  
7  
8  
9

10 Polykarpos Angelos Nomikos<sup>1,2</sup>, Michelle Hall<sup>2,3</sup>, Amy Fuller<sup>1,2</sup>, Bonnie Millar<sup>2,4</sup>,  
11 Reuben Ogollah<sup>5</sup>, Ana M Valdes<sup>2,4</sup>, Michael Doherty<sup>1,4</sup>, David Walsh<sup>2,4</sup>, Roshan das  
12 Nair<sup>6,7</sup>, Abhishek Abhishek<sup>1,2</sup>  
13  
14

15 <sup>1</sup> Academic Rheumatology, University of Nottingham, Nottingham, UK  
16

17 <sup>2</sup> NIHR Nottingham Biomedical Research Centre, University of Nottingham,  
18 Nottingham, UK  
19

20 <sup>3</sup> School of Health Sciences, University of Nottingham, Nottingham, UK  
21

22 <sup>4</sup> Pain Centre Versus Arthritis, University of Nottingham, Nottingham, UK  
23

24 <sup>5</sup> Nottingham Clinical Trials Unit, University of Nottingham, Nottingham, UK  
25

26 <sup>6</sup> Institute of Mental Health, University of Nottingham, Nottingham, UK  
27

28 <sup>7</sup> Division of Psychiatry & Applied Psychology, University of Nottingham,  
29 Nottingham, UK  
30

31 Corresponding author:  
32

33 Polykarpos Angelos Nomikos  
34

35 A 26 Clinical Sciences Building  
36

37 Nottingham City Hospital  
38

39 Hucknall Road  
40

41 Nottingham  
42

43 NG5 1PB  
44

45 UK  
46

47 E-mail address: Polykarpos.nomikos@nottingham.ac.uk  
48

49 Word count (excluding title page, abstract, references, figures and tables): 3808  
50  
51  
52  
53  
54  
55  
56  
57  
58  
59  
60

## ABSTRACT

**Objectives:** To evaluate the fidelity of delivery of a nurse-led non-pharmacological complex intervention for knee pain.

**Setting:** Secondary care. Single centre study.

**Participants:** Eighteen adults (33% women) with chronic knee pain, mean age 68.7 years, and body mass index 31.2 kg/m<sup>2</sup> participated. Fourteen completed all visits.

**Inclusion criteria:** Age > 40 years, knee pain present for longer than 3 months, knee pain for most days of the previous month, at least moderate pain in two of the five domains of Western Ontario and McMaster Universities Osteoarthritis Index pain scale.

**Interventions:** Nurse-led non-pharmacological package of care for knee pain comprising holistic assessment, education, exercise, dietary advice, use of hot/cold treatments, footwear modification, walking aids, and weight-loss advice (if required), delivered in 4 sessions over a 5-week period.

**Outcome(s):** Primary: Fidelity of delivery of intervention, Secondary: nurses' experience of delivering intervention.

**Methods:** All sessions were video recorded. Fidelity checklists were completed by the research nurse after each session and by an independent blinded researcher after viewing the video-recordings. Fidelity scores (%), percentage agreement and 95% Confidence Intervals (CI) were calculated. Semi-structured interview was conducted with the research nurse to explore the experience of delivering the intervention.

**Results:** Overall fidelity was higher on nurse self-report (97.7%) than on objective video-rating (84.2%). Percentage agreement between nurse self-report and video-

1  
2  
3 rating was 73.3% (95% CI: 71.3 - 75.3). Fidelity was lowest for advice on footwear and  
4 walking aids. The nurse reported difficulty in advising on thermal treatments, footwear  
5 and walking aids, and did not feel confident setting functional goals with participants.  
6  
7  
8  
9

10 **Conclusions:** A trained research nurse can deliver most components of an  
11 individualised non-pharmacological intervention for knee pain to a high degree of  
12 fidelity. Future research should assess fidelity in a clinical setting by nurses, and  
13 examine its clinical-effectiveness and cost-effectiveness.  
14  
15  
16  
17  
18  
19

20 **Trial registration number:** NCT03670706  
21  
22  
23

24 **KEY WORDS:** Knee pain, fidelity, nurse-led intervention, osteoarthritis  
25  
26  
27  
28  
29  
30

### 31 **STRENGTHS AND LIMITATIONS OF THE STUDY**

32  
33

- 34 • This novel mixed methods study used a combination of techniques to assess  
35 treatment fidelity.  
36
- 37 • We triangulated the fidelity findings with the interview findings and found  
38 convergence providing internal validity.  
39
- 40 • We identified the specific components of the categories not delivered as  
41 intended.  
42
- 43 • Only one nurse was involved in delivery of the intervention.  
44
- 45 • Lack of formal assessment of nurse knowledge of managing knee OA.  
46  
47  
48  
49  
50  
51  
52  
53  
54  
55  
56  
57  
58  
59  
60

## INTRODUCTION

Osteoarthritis (OA) is the commonest form of arthritis and is managed predominantly in primary care. The knee is a commonly affected site, with approximately one third of adults over the age of 50 years in the UK consulting their general practitioner (GP) for knee pain. (1) National Institute for Health and Care Excellence (NICE) guidelines (2) recommend a patient-centred approach with a focus on non-pharmacological interventions including education, strengthening and aerobic exercise, and weight loss if required. However, this can be difficult for general practitioners (GPs) to deliver for several reasons such as time constraint, and, core non-pharmacological treatments are under-utilised. (3, 4) Nurse-led care has been shown to give similar or better outcomes than GP-led care for other chronic diseases. (5-8) However, the efficacy and fidelity of delivery of nurse-led care has not been examined formally for OA.

Fidelity, defined as the degree to which the intervention is delivered as intended, (9) regulates the relationship between interventions and outcomes, and determines the extent to which an intervention affects the outcome. (10) Inferences regarding treatment effect of a complex intervention should therefore not be made without assessing fidelity, because absence of efficacy of an intervention may be due to inadequate implementation of the intervention. (11) Thus, the fidelity of intervention delivery influences the internal and external validity of a study. (12) If fidelity is not assessed, effective interventions may be rejected due to poor delivery. (13, 14)

The present study is part of the East-Midlands Knee Pain Cohort Randomised Controlled Trial (RCT) Study, (15) the overall purpose of which is to evaluate the feasibility of a nurse-led package of care for knee pain. The objective of the present

1  
2  
3 study was to evaluate the fidelity of delivery of a nurse-led non-pharmacological  
4  
5 package of care for knee pain during the package development phase of the RCT.  
6  
7  
8  
9  
10  
11  
12  
13  
14  
15  
16  
17  
18  
19  
20  
21  
22  
23  
24  
25  
26  
27  
28  
29  
30  
31  
32  
33  
34  
35  
36  
37  
38  
39  
40  
41  
42  
43  
44  
45  
46  
47  
48  
49  
50  
51  
52  
53  
54  
55  
56  
57  
58  
59  
60

For peer review only



## METHODS

**Study Design:** A mixed methods study.

**Setting:** Secondary care.

**Participants and Recruitment:** The participants were adults with knee pain. Community dwelling adults participating in the Investigating Musculoskeletal Health and Wellbeing (IMHW) cohort study, (16) self-reporting knee pain were sent a postal invitation to participate in this study. People who responded underwent telephone screening to assess eligibility. The inclusion criteria were: age > 40 years, ability to read and write in English, knee pain present for longer than three months, pain in or around the knee on most days of the previous month, and at least moderate pain in two of the five domains of the Western Ontario and McMaster Universities Osteoarthritis Index (WOMAC) pain scale. (17)

**Research nurse training:** A training programme to enable a nurse to deliver the current NICE guidelines for osteoarthritis management was developed and an educational manual produced. (15) The training included face-to-face learning, case-studies, on-line resources and simulated patients. Practical sessions on delivering and modifying exercise, weight loss advice and use of strategies to encourage adherence were also included.

**Patient and Public Involvement:** A patient advisory group of three people with hip or knee OA supported the design of this study. All had different experiences in primary and secondary care and provided input into the content of the non-pharmacological package, the training of the nurse, and the use of exercise diaries and educational content.

1  
2  
3 **Intervention:** The template for intervention description and replication (TIDieR)  
4 checklist (18) was used to describe the intervention and its key features. The items of  
5 the non-pharmacological intervention are described in Additional file 1. After the  
6 training period, the nurse delivered the intervention in four sessions over a five-week  
7 period. The intervention consisted of a holistic assessment of the participant, providing  
8 education about the nature of OA and self-management strategies including advice on  
9 the role of exercise, maintaining a healthy weight, and use of adjunctive treatments  
10 such as the application of heat or cold, foot-wear modification and use of walking aids.  
11 The nurse explained aerobic and strengthening exercises and advised each  
12 participant on individualised regimens. If required, weight-loss advice was provided.  
13 Behaviour change strategies (19) such as goal setting, action planning, assessment  
14 of participant confidence to achieve goals, discussion of barriers and facilitators and  
15 the use of exercise diaries were used to improve adherence. Functional goals were  
16 agreed and were used to facilitate the exercise prescription with goals being Specific,  
17 Measurable, Achievable, Relevant, and Timely (SMART). SMART weight loss goals  
18 were agreed also with overweight participants.

19  
20  
21  
22  
23  
24  
25  
26  
27  
28  
29  
30  
31  
32  
33  
34  
35  
36  
37  
38  
39  
40  
41 **Consent:** All participants including the research nurse gave their written, informed  
42 consent prior to treatment delivery, including consent to video record the sessions.

43  
44  
45  
46 **Fidelity assessment:** The study followed the National Institutes of Health Behaviour  
47 Change Consortium (NIHBCC) guidelines for fidelity assessment. (13) The fidelity  
48 checklist was developed a priori (Additional file 2) and comprised eight categories:  
49 materials; introduction; assessment; education; exercise; weight loss; advice on  
50 adjunctive treatments; and review and planning. However, not all components of the  
51 intervention categories were intended to be delivered in each session (Table 1). For  
52  
53  
54  
55  
56  
57  
58  
59  
60

1  
2  
3 example, advice on the adjunctive treatments, could be provided in any of the four  
4  
5 sessions.  
6

7  
8 The responses of the fidelity checklist were categorical and rated as completed,  
9  
10 partially completed, not completed, or not applicable (N/A). All intervention sessions  
11  
12 were video-recorded. After each session, the nurse self-rated the fidelity checklist.  
13  
14 Blinded to the nurse ratings, the video-recording of each session was independently  
15  
16 reviewed and rated by PAN. A second rater (MH) further independently rated 20% of  
17  
18 the sessions. Both raters had experience of delivering the intervention and were  
19  
20 familiar with the intervention. MH co-designed the nurse training programme and PAN  
21  
22 had attended the training. The process for assessment of fidelity followed that of  
23  
24 previous studies. (20)  
25  
26  
27  
28

29  
30 One week after the final session, the nurse took part in a semi-structured interview.  
31  
32 The interview guide (Additional file 3) covered the nurse's view on their training,  
33  
34 confidence in and experience of delivering the individual components of the non-  
35  
36 pharmacological intervention, perceived barriers to delivering it as planned, and  
37  
38 opportunities to improve the non-pharmacological package of care. An iterative  
39  
40 process was used for data collection, so an additional interview was conducted to  
41  
42 capture any salient points raised by the initial quantitative data we collected. The  
43  
44 qualitative findings were mapped onto the fidelity checklist categories to assess  
45  
46 convergence between the quantitative and qualitative findings. Any areas of  
47  
48 uncertainty or gaps were then explored in a second interview with the nurse.  
49  
50  
51

52  
53 **Quantitative data analysis:** Mean and standard deviation (SD), median and inter  
54  
55 quartile range (IQR) and frequency data (counts and percentages were calculated  
56  
57 for descriptive purposes. Fidelity scores were calculated as the percentage of  
58  
59  
60

1  
2  
3 components that were delivered as intended for overall delivery of the intervention,  
4  
5 for each session and for each category.  
6  
7

8 Components rated as 'completed' were given a score of 2, 'partially completed' a  
9 score of 1, and not completed, a score of zero. Partially completed is scored whether  
10 the nurse has given the appropriate advice for a particular component but did not  
11 followed it up after the participant response. Any components that were rated as not-  
12 applicable e.g. weight loss for participants who were not overweight, were excluded  
13 from the calculation. Median fidelity scores (%) and inter-quartile range (IQR) were  
14 calculated for the entire intervention, per session and per component of the  
15 intervention. Fidelity was classified as previously reported: 80-100% 'high', 51-79%  
16 'moderate', and 0-50% 'low' fidelity. (21) Where fidelity was moderate or low in a  
17 particular category, we further explored this by examining the fidelity of delivery of  
18 their individual components.  
19  
20  
21  
22  
23  
24  
25  
26  
27  
28  
29  
30  
31  
32  
33

34 Percentage agreement with 95% confidence intervals (CI) was used to estimate the  
35 level of agreement between self-report and video-record methods, and for inter-rater  
36 agreement.  
37  
38  
39  
40  
41

42 **Qualitative data analysis:** The interviews were transcribed verbatim by an external  
43 transcription company. The interviewer removed any identifiers and ensured  
44 transcripts were accurate. Transcripts were analysed following the principles of the  
45 general inductive approach. (22) The first transcript was read several times before  
46 data related to the research objectives was identified, labelled and categorised.  
47 Categories were discussed between the interviewer and a second researcher (AF).  
48 This process identified gaps and led to the second interview and the transcript was  
49 analysed in the same way. Following agreement that the categories reflected the  
50  
51  
52  
53  
54  
55  
56  
57  
58  
59  
60

1  
2  
3 overall account reported by the nurse, extracts were taken from the transcripts to  
4 exemplify the findings.  
5  
6

7  
8 **Convergence:** A meta-matrix was developed to explore convergence between the  
9 findings. This approach enhances study validity by increasing the probability that our  
10 findings and interpretations are credible and reliable. (23) Convergence was defined  
11 as agreement between both sets of data, and discrepancy as disagreement between  
12 them.  
13  
14  
15  
16  
17  
18  
19

20 **Reporting guidelines:** The Standards for Quality Improvement Reporting Excellence  
21 (SQUIRE) guidelines (24) were used to improve the quality of reporting of this study.  
22  
23  
24  
25  
26  
27  
28  
29  
30  
31  
32  
33  
34  
35  
36  
37  
38  
39  
40  
41  
42  
43  
44  
45  
46  
47  
48  
49  
50  
51  
52  
53  
54  
55  
56  
57  
58  
59  
60

**Table 1.** The delivery of the intervention components in each session

| Content of the non-pharmacological intervention                    | Session |   |   |   |
|--------------------------------------------------------------------|---------|---|---|---|
|                                                                    | 1       | 2 | 3 | 4 |
| <b>Materials</b>                                                   |         |   |   |   |
| Patient education booklet on OA                                    | ✓       |   |   |   |
| Exercise/activity diary                                            | ✓       |   |   |   |
| Goal setting forms                                                 | ✓       |   |   |   |
| <b>Introduction</b>                                                | ✓       |   |   |   |
| <b>Holistic assessment of person with OA</b>                       | ✓       | ✓ | ✓ | ✓ |
| <b>Education</b>                                                   | ✓       | ✓ | ✓ | ✓ |
| <b>Exercise</b>                                                    |         |   |   |   |
| Smart goal setting                                                 | ✓       |   |   |   |
| Smart goal reviewed                                                |         | ✓ | ✓ |   |
| Patients level of confidence for the exercise programme determined | ✓       | ✓ | ✓ | ✓ |
| <b>Weight loss (if required)</b>                                   | ✓       | ✓ | ✓ | ✓ |
| <b>Adjunct treatments</b>                                          |         |   |   |   |
| Use of heat/cold treatments discussed                              | ✓       | ✓ | ✓ | ✓ |
| Walking aids discussed                                             | ✓       | ✓ | ✓ | ✓ |
| Footwear discussed                                                 | ✓       | ✓ | ✓ | ✓ |
| <b>Review and Planning</b>                                         |         |   |   |   |
| Session review: goal setting synopsis and action plan              | ✓       | ✓ | ✓ | ✓ |

## RESULTS

### Quantitative findings:

Eighteen participants (33% women), with a mean age of 68.7 (SD 9.0) years and body mass index of 31.2 (SD 8.4) kg/m<sup>2</sup> respectively took part in the study. Of these, fourteen completed all four visits. The reasons for dropping out were other commitments (n=3), reluctance to lose weight (n=1), and inadequate understanding of the nature of the intervention (n=1).

In total, 62 intervention sessions were delivered. The median (IQR) duration of the first and follow-up sessions was 87 (81–101) minutes, and 46 (37–52) minutes respectively. Overall fidelity was rated high by both nurse self-rated (97.7%) and video-rated scores (84.2%) (Tables 2, 3). Inter-rater agreement for the video-recording checklist was 70.3% (95%CI 64.4, 74.2).

For the nurse self-rated checklist, median fidelity scores for each session ranged from 94.4-100% (Table 2). Individual categories received high ratings except for adjunctive treatments i.e. use of heat/cold therapy and advice on footwear where the fidelity score was moderate in many sessions.

For the video-rated checklists, overall median fidelity scores for each session ranged from 77.7-87.2% (Table 3). Fidelity for education was lower in the first session (78.13%, IQR 74.11, 93.75) but improved in the follow-up session (87.50%, IQR 50,100). Fidelity for review and planning was lower in the first and last sessions. Fidelity scores were low for adjunctive treatments across all sessions, and varied from 0% to 50%. Fidelity of delivery for exercise goal-setting was moderate at 66% and, fidelity for reviewing goals during follow-up sessions was low, ranging between 44-

1  
2  
3 50%. Additionally, assessment of patients' level of confidence to achieve their exercise  
4  
5 goal was low in the follow-up sessions, ranging between 7-40%.  
6  
7

8  
9 The overall agreement between nurse-rated and video-rated methods was 73.3%  
10 (95% CI 71.3 - 75.3). The level of agreement for individual categories is shown in  
11 figure 1. Excellent agreement was found for materials, introduction, and assessment.  
12  
13 Agreement was below the cut-off point of 80% for education, exercise, weight loss and  
14 adjunctive treatment. The level of agreement for review and planning category was  
15  
16 58.1% (95% CI 44.8, 70.5).  
17  
18  
19  
20  
21  
22  
23  
24  
25  
26  
27  
28  
29  
30  
31  
32  
33  
34  
35  
36  
37  
38  
39  
40  
41  
42  
43  
44  
45  
46  
47  
48  
49  
50  
51  
52  
53  
54  
55  
56  
57  
58  
59  
60



**Table 2.** Nurse-rated fidelity scores for each session

| Intervention component | Session 1*       | Session 2*     | Session 3*       | Session 4*      |
|------------------------|------------------|----------------|------------------|-----------------|
| Materials              | 100 (100, 100)   | -              | -                | -               |
| Introduction           | 100 (100, 100)   | -              | -                | -               |
| Assessment             | 100 (98.3, 100)  | 100 (100, 100) | 100 (100, 100)   | 100 (100, 100)  |
| Education              | 100 (100, 100)   | 100 (100, 100) | 100 (100, 100)   | 100 (100, 100)  |
| Exercise               | 100 (97.5, 100)  | 100 (100, 100) | 100 (97.5, 100)  | 100 (75, 100)   |
| Weight loss            | 100 (88.9, 100)  | 100 (100, 100) | 100 (66.7, 100)  | 100 (79.2, 100) |
| Adjunct treatments     | 87.5 (33.3, 100) | 87.5 (0, 100)  | 66.7 (45.8, 100) | -               |
| Review and planning    | 100 (100, 100)   | 100 (100, 100) | 100 (100, 100)   | 100 (100, 100)  |

\*Values are median% (IQR)

**Table 3.** Video-rated fidelity scores for each session

| Intervention categories | Session 1*         | Session 2*      | Session 3*      | Session 4*      |
|-------------------------|--------------------|-----------------|-----------------|-----------------|
| Materials               | 100 (100, 100)     | -               | -               | -               |
| Introduction            | 100 (75, 100)      | -               | -               | -               |
| Assessment              | 91.43 (85, 93.3)   | 100 (100, 100)  | 100 (100, 100)  | 100 (100, 100)  |
| Education               | 78.13 (74.1, 93.8) | 87.5 (50, 100)  | 87.5 (50, 100)  | 100 (93.8, 100) |
| Exercise                | 94.4 (88.9, 100)   | 88.9 (75, 94.4) | 86.1 (72, 100)  | 75 (67.6, 82.8) |
| Weight loss             | 100 (87.5, 100)    | 90 (60, 100)    | 100 (68.9, 100) | 80 (49.2, 100)  |
| Adjunct treatments      | 50 (45.8, 100)     | 0 (0, 50)       | 50 (0, 100)     | -               |
| Review and planning     | 75 (75, 100)       | 100 (100, 100)  | 100 (100, 100)  | 75 (37.5, 100)  |

\*Values are median% (IQR)

### Qualitative findings:

The duration of the initial and follow-up interview was 94 minutes, and 34 minutes respectively. The nurse reported feeling nervous when she delivered the intervention for the very first time, but felt more comfortable as the sessions progressed.

*“Very nervous... to start with... I don't think after a few sessions I was uncomfortable, I was probably more comfortable delivering the intervention...after few sessions, got better at getting feedback from patient as well so I think that boosted my confidence”.*

The nurse felt that education was not always delivered as well in the first few sessions as in the follow-up sessions.

*“First few sessions I didn't think of as very good to tell them about the information and then later on, I built that ...”*

The nurse felt that patient assessment was easy to deliver considering their previous experience in that particular area.

*“I would say some of them were easy to find pinpoint the problems...as a nurse we always been asking these questions to patients... in this case but had previous experience in that area”*

However, they initially lacked confidence in prescribing exercise to the patients.

*“I had to decide after the assessment which exercise I'm going to assign them and I didn't feel comfortable...“I wasn't sure that whatever assessment I have done and the exercise I choose, that's going to make it any better ... I wasn't 100% sure”.*

1  
2  
3 They felt that it was easier to determine and link the exercises for patients who already  
4 had obvious abnormalities in their knees such as swelling or when patients were  
5 limping.  
6  
7  
8  
9

10 *“When there are obviously problems in the knee you can see, you can link what*  
11 *exercise... when you can't see the obvious problems, then it was difficult to*  
12 *determine what exercise you are going to assign”*  
13  
14  
15  
16

17  
18 The nurse felt more confident and was able to adapt the exercises after delivering  
19 several sessions as they became more familiar with the exercises and having received  
20 feedback from the patients.  
21  
22  
23  
24

25 *“I felt comfortable altering the exercise for them,... knowing that obviously, if it's*  
26 *painful for them then switching to a different exercise.”*  
27  
28  
29

30  
31 However, they felt uncomfortable setting goals and assessing patients' level of  
32 confidence for the prescribed exercise.  
33  
34  
35

36 *“I couldn't link that, goal setting... I find that part still not comfortable.”*  
37  
38

39 In particular, the nurse found it difficult to motivate and negotiate the goal with each  
40 patient further, as they felt that most set high expectations to achieve their goals,  
41 whilst patients were scoring their confidence low.  
42  
43  
44  
45

46 *“The difficulty is that the goal setting they would expect high but then they*  
47 *when you ask them how likely you are going to achieve this goal their rating*  
48 *will be low... their rating will be like 4 or 5 and how you motivate them to go*  
49 *up to 8 or 7, 8, 9, that one's kind of difficult.”*  
50  
51  
52  
53  
54  
55

56 The nurse delivered the weight loss advice with ease compared with the exercise and  
57 managed to explain to every patient why it is good to lose weight where required.  
58  
59  
60

1  
2  
3           *“For the weight loss, you easily do that... I didn't feel too much*  
4           *uncomfortable...so positive from that is that I managed to tell everyone.”*  
5  
6  
7

8 The nurse felt it was not difficult to summarise the goal set with every patient at the  
9 end of each session.  
10

11  
12  
13           *“Not difficult... we always talked about it, “This is what we discussed today, this*  
14           *is the exercise we have assigned you and if you feel that you can progress*  
15           *further, do so.””*  
16  
17  
18  
19

20  
21 Even though they felt it was not difficult to deliver or incorporate the adjunctive  
22 treatments, they occasionally forgot to mention them or felt it was not necessary to  
23 repeat this in a subsequent session.  
24  
25  
26

27  
28           *“I do not think it was difficult to ask that or incorporate... it was probably as a*  
29           *human error or that you forgot to mention it...with some patients if you already*  
30           *mentioned once or twice, so with the first session, that if you need to you can*  
31           *use hot and cold therapy, and then they refuse it ... then there is no point*  
32           *[mentioning it again]”*  
33  
34  
35  
36  
37  
38  
39

40  
41 The nurse felt that there was a lot of information for the participants to take on board  
42 during that first initial assessment session and recommended that the advice could be  
43 spread over two or three sessions.  
44  
45  
46

47  
48           *“I think that session could be divided, erm, the very first one at least in two*  
49           *sessions... so first session, you just get to know the patient and they get their*  
50           *feedback and, don't give them any, too much of a diet and weight loss*  
51           *information”*  
52  
53  
54  
55  
56  
57  
58  
59  
60

1  
2  
3 **Integrating findings:** Convergence was found between the fidelity scores and nurse  
4 interview (Table 4). The nurse expressed that she did not feel confident in goal setting,  
5  
6 which was reflected in the fidelity findings. The nurse felt that education was not always  
7  
8 delivered as well in the first session as in the follow-up sessions, which is consistent  
9  
10 with the moderate fidelity findings in the first session but with higher fidelity in  
11  
12 subsequent sessions. Weight loss advice was delivered with high fidelity and the nurse  
13  
14 also felt confident that she was able to deliver weight loss advice fully. A perceived  
15  
16 lack of confidence in delivering the exercise component is consistent with fidelity  
17  
18 scores for the exercise category that were lower compared with the weight loss  
19  
20 category. The adjunctive treatments were not always delivered as intended and that  
21  
22 was consistent with the interview findings. Finally, convergence was found for review  
23  
24 and planning as the nurse found it easy to summarise patient goals at the end of each  
25  
26 session and overall fidelity findings were high. There were no divergent findings.  
27  
28  
29  
30  
31  
32  
33  
34  
35  
36  
37  
38  
39  
40  
41  
42  
43  
44  
45  
46  
47  
48  
49  
50  
51  
52  
53  
54  
55  
56  
57  
58  
59  
60

**Table 4.** Convergence between observed fidelity and nurse interview findings

| <b>Intervention Categories</b>            | <b>Overall fidelity (%)*</b> | <b>Qualitative interview findings</b>                                                                                                                                                                                                                                                            | <b>Convergence</b> |
|-------------------------------------------|------------------------------|--------------------------------------------------------------------------------------------------------------------------------------------------------------------------------------------------------------------------------------------------------------------------------------------------|--------------------|
| Overall fidelity score for all categories | 84.2                         | " I find myself that ... that I can deliver the care...I was probably more comfortable delivering the intervention...after few sessions"                                                                                                                                                         | Yes                |
| Materials                                 | 100                          | " I had to show them the booklet every patient so I don't think I have forgotten to do that"                                                                                                                                                                                                     | Yes                |
| Introduction                              | 100                          | "I explain all the study and then explain that whole process again for the purpose of the session"                                                                                                                                                                                               | Yes                |
| Assessment                                | 97.8                         | "I would say some of them were easy to find pinpoint the problems...as a nurse we always been asking these questions to patients... in this case but had previous experience in that area"                                                                                                       | Yes                |
| Exercise                                  | 86.1                         | "We practiced and demonstrated exercises... I felt comfortable altering the exercise for them...I just couldn't think how to link that, erm, goal setting I didn't deliver it good... I don't think I could have delivered it any better than that either... some did actually achieve the goal" | Yes                |
| Education                                 | 88.3                         | "first few sessions I didn't think of as very good to tell them about the information and then later on, I built that"                                                                                                                                                                           | Yes                |

|                     |      |                                                                                                                                                                                                                                                                       |     |
|---------------------|------|-----------------------------------------------------------------------------------------------------------------------------------------------------------------------------------------------------------------------------------------------------------------------|-----|
| Weight loss         | 92.5 | <i>"Positive from that is that I managed to tell everyone that, "you need to lose weight", so I think it was kind of structured in a way... I didn't feel too much uncomfortable"</i>                                                                                 | Yes |
| Adjunct treatments  | 33.3 | <i>"it was probably as a human error or that you forgot to mention it...with some patients if you already mentioned once or twice so with the first session that you need to you can use hot and cold therapy and then they refuse it and then there is no point"</i> | Yes |
| Review and planning | 87.5 | <i>"Not difficult... we always talked about it this is what we discussed it today this is the exercise we, have assigned you and if you feel that you can progress into further do so"</i>                                                                            | Yes |

\*Overall fidelity scores for the different categories across the four sessions



## DISCUSSION

This study evaluated fidelity of delivery of a nurse-led non-pharmacological package of care for knee pain and validated the findings in an interview with the nurse that delivered it. The study was of people with knee pain but none had evidence of inflammatory arthritis and in this age group, OA is the main cause of chronic usage related knee pain. (25) The majority of the non-pharmacological components of the intervention were delivered with good fidelity. Excellent fidelity was found for patient assessment, education, demonstration and advice on exercise and weight loss advice. Components which demonstrated lower fidelity included goal setting and review. These were also perceived as difficult by the nurse. Advice around the use of adjunctive treatments such as the use of hot or cold treatments, walking aids and footwear, were also not delivered as planned. Agreement between the nurse and independent rater was below the cut-off point of 80% for education, exercise, weight loss, adjunctive treatment, and review and planning which is reported as the minimum acceptable agreement between raters in previous research. (26)

Previous studies using mixed methods have found good fidelity of delivery of a physiotherapist-led complex package of care for chronic low-back pain and OA. (20, 27) In our study, the research nurse rated themselves higher than the independent rating using the video recordings. This is consistent with previous studies. (28)

There are several methods to assess treatment fidelity, including direct observation, patient self-report questionnaire, provider self-report checklist and indirect observation using audio or video-recordings. (13) We used a combination of methods as it provides an in-depth fidelity assessment. (27) Direct observation is considered the gold-standard to evaluate fidelity, however it can be intrusive and may affect patient

1  
2  
3 practitioner interaction, (29, 30) and may not be feasible in large-scale multicentre  
4  
5 RCTs. Provider self-report methods are simple and inexpensive but can be inaccurate,  
6  
7 (31) and patient report methods are even less reliable. (13) Video-recording the  
8  
9 delivery of intervention and independent assessment of fidelity may provide a robust  
10  
11 alternative to direct observation. (32) Indeed, (33, 34) it has been shown previously  
12  
13 that assessing fidelity using independently rated recordings and provider self-report  
14  
15 checklist is feasible and acceptable. (20) We preferred to use video recordings as this  
16  
17 is less intrusive than an observer being present, and provides an opportunity to assess  
18  
19 reliability, and review the sessions again if needed.  
20  
21  
22

23  
24 Medical Research Council guidelines for developing and evaluating complex  
25  
26 interventions (35) have highlighted the importance of conducting process evaluation.  
27  
28 The purpose of this is to assess the quality and quantity of the implementation of  
29  
30 intervention, and trials that collect rich qualitative data may identify potential barriers  
31  
32 and facilitators to intervention implementation. However, collecting only qualitative or  
33  
34 quantitative data to assess treatment delivery would not unearth a comprehensive  
35  
36 picture to understand complex constructs within the research outcomes. (23) For this  
37  
38 reason, we used a mixed methods approach. (36)  
39  
40  
41

42  
43 Our study is based on a fidelity checklist that has been previously validated in complex  
44  
45 interventions delivered in a research setting. (20) We tailored the checklist according  
46  
47 to the intervention and further refined it. Moreover, the reliability of the fidelity checklist  
48  
49 was established.  
50  
51

52  
53 There are a number of limitations to this study. A key caveat is that only one nurse  
54  
55 was involved in delivery of the intervention. In a larger trial, there would be more nurses  
56  
57 to deliver the intervention across multiple sites, which increases the likelihood of  
58  
59  
60

1  
2  
3 variation in fidelity between the intervention providers. This study lasted 17 weeks and  
4 this is a short period of time over which fidelity would not be expected to fluctuate  
5 much. However, this can be an issue with longer studies. (37). A second limitation is  
6 a lack of formal assessment of nurse knowledge of managing knee OA. A single  
7 research nurse delivered the intervention and was interviewed. In the absence of data  
8 from additional participants, categories could not be revised and refined into fully  
9 realised themes, however, an inductive approach to analysis was taken to reflect the  
10 views of the intervention provider. The intervention was delivered by a research nurse  
11 with no background knowledge of musculoskeletal diseases and no previous  
12 experience delivering treatment to arthritis patients. This is a particular strength as we  
13 were able to assess the effectiveness of our nurse training programme and its  
14 shortcomings. Additionally, we video-recorded and evaluated all the consultations that  
15 were delivered. One of the key strengths of our study was that we identified the specific  
16 components of the categories not delivered as intended. Moreover, we triangulated  
17 the findings and found convergence providing internal validity. The nurse was  
18 interviewed to address some of the NIHBCO components (study design, provider  
19 training) that have not been examined previously. (27)

20  
21  
22  
23  
24  
25  
26  
27  
28  
29  
30  
31  
32  
33  
34  
35  
36  
37  
38  
39  
40  
41  
42  
43 Complex interventions are often a dynamic interplay between patient and therapist  
44 and this is not a package delivered by the nurse and passively received by the patient.  
45 Adaptation is a co-creation of the intervention in which therapist behaviour affects  
46 patient behaviour and vice versa in order to negotiate goals. (38) Based on the  
47 findings, it was challenging to address adaptation and determine the appropriate  
48 balance between fidelity and adaptation as the nurse did not feel confident setting goal  
49 particularly for exercise. This may be because the weight loss goal was initially set at  
50 5% of body weight, whereas the exercise goal was more flexible and determined with  
51  
52  
53  
54  
55  
56  
57  
58  
59  
60

1  
2  
3 the participant following the assessment. It appears that confidence, previous  
4 knowledge or background, and experience on musculoskeletal diseases delivering the  
5 intervention might be associated with intervention adaptation. It would therefore be  
6 important for future research to examine whether there is an association between  
7 intervention adaptation and nurses' experience or background and confidence.  
8 Follow-up training sessions with nurses should also be considered for longer studies  
9 to ensure minimal fluctuation of fidelity over time  
10  
11  
12  
13  
14  
15  
16  
17  
18  
19

20 Our nurse-led delivery of a complex package of care was feasible within a research  
21 setting. The research nurse delivered care for patients with knee pain due to OA with  
22 high fidelity for most of the components of the intervention except for advice about the  
23 use of hot/cold treatments, walking aids, footwear and goal setting. The training  
24 package for delivery of the intervention will need to ensure that the nurses are  
25 confident in delivering the behavioural change strategies such as goal setting. More  
26 training on education, exercise, weight loss, adjunctive treatments, and review and  
27 planning should also be undertaken before they score themselves again on the  
28 feasibility trial. Future work will need to consider fidelity where there will be more than  
29 one nurse delivering the intervention in a clinical setting. Our results, however, show  
30 that it is feasible to apply the non-pharmacological package of care in a future  
31 feasibility RCT.  
32  
33  
34  
35  
36  
37  
38  
39  
40  
41  
42  
43  
44  
45  
46  
47

## 48 LEGENDS

49  
50  
51 **Figure 1.** Agreement between nurse-rated and video-rated methods for the  
52 individual categories of the intervention  
53  
54

55  
56  
57 Values shown are % agreement and error bars indicate the 95% CI  
58  
59  
60

## REFERENCES

1. Jinks C, Jordan K, Ong B, Croft P. A brief screening tool for knee pain in primary care (KNEST). 2. Results from a survey in the general population aged 50 and over. *Rheumatology*. 2004;43(1):55-61.
2. NICE. National Institute for Health and Care Excellence 2014.
3. Egerton T, Nelligan RK, Setchell J, Atkins L, Bennell KL. General practitioners' views on managing knee osteoarthritis: a thematic analysis of factors influencing clinical practice guideline implementation in primary care. *BMC rheumatology*. 2018;2(1):30.
4. Porcheret M, Jordan K, Jinks C, Society PCicwtPCR. Primary care treatment of knee pain—a survey in older adults. *Rheumatology*. 2007;46(11):1694-700.
5. Doherty M, Jenkins W, Richardson H, Sarmanova A, Abhishek A, Ashton D, et al. Efficacy and cost-effectiveness of nurse-led care involving education and engagement of patients and a treat-to-target urate-lowering strategy versus usual care for gout: a randomised controlled trial. *The Lancet*. 2018;392(10156):1403-12.
6. Saffi MAL, Polanczyk CA, Rabelo-Silva ER. Lifestyle interventions reduce cardiovascular risk in patients with coronary artery disease: a randomized clinical trial. *European journal of cardiovascular nursing*. 2014;13(5):436-43.
7. Strömberg A, Mårtensson J, Fridlund B, Levin L-Å, Karlsson J-E, Dahlström U. Nurse-led heart failure clinics improve survival and self-care behaviour in patients with heart failure: results from a prospective, randomised trial. *European heart journal*. 2003;24(11):1014-23.
8. Welch G, Garb J, Zagarins S, Lendel I, Gabbay RA. Nurse diabetes case management interventions and blood glucose control: results of a meta-analysis. *Diabetes research and clinical practice*. 2010;88(1):1-6.
9. Allen JD, Linnan LA, Emmons KM, Brownson R, Colditz G, Proctor E. Fidelity and its relationship to implementation effectiveness, adaptation, and dissemination. *Dissemination and implementation research in health: Translating science to practice*. 2012:281-304.
10. Carroll C, Patterson M, Wood S, Booth A, Rick J, Balain S. A conceptual framework for implementation fidelity. *Implementation science*. 2007;2(1):40.
11. Moncher FJ, Prinz RJ. Treatment fidelity in outcome studies. *Clinical psychology review*. 1991;11(3):247-66.
12. Colditz GA, Emmons KM. The promise and challenges of dissemination and implementation research. *Dissemination and implementation research in health: Translating science to practice*. 2012:3-22.
13. Borrelli B. The assessment, monitoring, and enhancement of treatment fidelity in public health clinical trials. *Journal of public health dentistry*. 2011;71:S52-S63.
14. Walker MF, Hoffmann TC, Brady MC, Dean CM, Eng JJ, Farrin AJ, et al. Improving the development, monitoring and reporting of stroke rehabilitation research: Consensus-based core recommendations from the Stroke Recovery and Rehabilitation Roundtable. *International Journal of Stroke*. 2017;12(5):472-9.
15. Hall M, Fuller A, Nomikos PA, Millar B, Ogollah R, Valdes A, et al. East Midlands knee pain multiple randomised controlled trial cohort study: cohort establishment and feasibility study protocol. *BMJ Open*. 2020;10(9):e037760.
16. Millar B, McWilliams DF, Abhishek A, Akin-Akinyosoye K, Auer DP, Chapman V, et al. Investigating musculoskeletal health and wellbeing; a cohort study protocol. *BMC Musculoskeletal Disorders*. 2020;21(1):1-10.
17. Bellamy N. WOMAC Osteoarthritis Index User Guide, vol. 5. Brisbane, Australia. 2002.
18. Hoffmann TC, Glasziou PP, Boutron I, Milne R, Perera R, Moher D, et al. Better reporting of interventions: template for intervention description and replication (TIDieR) checklist and guide. *Bmj*. 2014;348.
19. Michie S, Rumsey N, Fussell A, Hardeman W, Johnston M, Newman S, et al. Improving health: changing behaviour. *NHS health trainer handbook*. 2008.

20. Toomey E, Matthews J, Guerin S, Hurley DA. Development of a feasible implementation Fidelity protocol within a complex physical therapy-led self-management intervention. *Physical therapy*. 2016;96(8):1287-98.
21. Borrelli B, Sepinwall D, Ernst D, Bellg AJ, Czajkowski S, Breger R, et al. A new tool to assess treatment fidelity and evaluation of treatment fidelity across 10 years of health behavior research. *Journal of consulting and clinical psychology*. 2005;73(5):852.
22. Thomas DR. A General Inductive Approach for Analyzing Qualitative Evaluation Data. *American Journal of Evaluation*. 2006;27(2):237-46.
23. Farmer T, Robinson K, Elliott SJ, Eyles J. Developing and implementing a triangulation protocol for qualitative health research. *Qualitative health research*. 2006;16(3):377-94.
24. Ogrinc G, Davies L, Goodman D, Batalden P, Davidoff F, Stevens D. SQUIRE 2.0 (Standards for QUality Improvement Reporting Excellence): revised publication guidelines from a detailed consensus process. *BMJ quality & safety*. 2016;25(12):986-92.
25. Peat G, McCarney R, Croft P. Knee pain and osteoarthritis in older adults: a review of community burden and current use of primary health care. *Annals of the Rheumatic Diseases*. 2001;60(2):91-7.
26. McHugh ML. Interrater reliability: the kappa statistic. *Biochemia medica*. 2012;22(3):276-82.
27. Toomey E, Matthews J, Hurley DA. Using mixed methods to assess fidelity of delivery and its influencing factors in a complex self-management intervention for people with osteoarthritis and low back pain. *BMJ open*. 2017;7(8):e015452.
28. Hardeman W, Michie S, Fanshawe T, Prevost AT, Mcloughlin K, Kinmonth AL. Fidelity of delivery of a physical activity intervention: predictors and consequences. *Psychology and Health*. 2008;23(1):11-24.
29. Bellg AJ, Borrelli B, Resnick B, Hecht J, Minicucci DS, Ory M, et al. Enhancing treatment fidelity in health behavior change studies: best practices and recommendations from the NIH Behavior Change Consortium. *Health Psychology*. 2004;23(5):443.
30. French SD, Green SE, Francis JJ, Buchbinder R, O'Connor DA, Grimshaw JM, et al. Evaluation of the fidelity of an interactive face-to-face educational intervention to improve general practitioner management of back pain. *BMJ open*. 2015;5(7):e007886.
31. Jobe JB. Cognitive psychology and self-reports: models and methods. *Quality of Life Research*. 2003;12(3):219-27.
32. Schulte AC, Easton JE, Parker J. Advances in treatment integrity research: Multidisciplinary perspectives on the conceptualization, measurement, and enhancement of treatment integrity. *School Psychology Review*. 2009;38(4).
33. Huijg JM, Dusseldorp E, Gebhardt WA, Verheijden MW, van der Zouwe N, Middelkoop BJ, et al. Factors associated with physical therapists' implementation of physical activity interventions in the Netherlands. *Physical therapy*. 2015;95(4):539-57.
34. McKenna JW, Flower A, Ciullo S. Measuring fidelity to improve intervention effectiveness. *Intervention in School and Clinic*. 2014;50(1):15-21.
35. Craig P, Dieppe P, Macintyre S, Michie S, Nazareth I, Petticrew M. Developing and evaluating complex interventions: the new Medical Research Council guidance. *Bmj*. 2008;337:a1655.
36. Moore GF, Audrey S, Barker M, Bond L, Bonell C, Hardeman W, et al. Process evaluation of complex interventions: Medical Research Council guidance. *BMJ : British Medical Journal*. 2015;350:h1258.
37. Radford K, Sutton CJ, Sach T, Holmes J, Watkins CL, Forshaw D, et al. Early, specialist vocational rehabilitation to facilitate return to work after traumatic brain injury: the FRESH feasibility RCT. *Health technology assessment*. 2018;22(33):1-156.
38. Poltawski L, Norris M, Dean S. Intervention fidelity: developing an experience-based model for rehabilitation research. *Journal of rehabilitation medicine*. 2014;46(7):609-15.

## FUNDING STATEMENT

This research was supported and co-funded by the NIHR Nottingham Biomedical Research Centre and the Pain Centre Versus Arthritis. The views expressed are those of author(s) and not necessarily those of the NHS, the NIHR or the Department of Health and Social Care. The study is sponsored by the University of Nottingham, UK.

## COMPETING INTEREST STATEMENTS

All authors declare no competing interests.

## ETHICS APPROVAL

The study received ethical approval by the East Midlands-Derby Research Ethics Committee (REC) (18/EM/0288).

## CONTRIBUTORS

All authors contributed to the design and conception of the study. PAN conducted the quantitative and qualitative data collection and analysis. MH was the independent rater for video assessment of fidelity. AF and RdN provided guidance in the qualitative data collection and analysis. RO, AA and MH provided guidance in the quantitative analysis. BM contributed to the study set up and recruitment. PAN wrote the first draft. All authors have read, provided critical feedback and approved the final manuscript.

## PATIENT CONSENT

Obtained

## DATA STATEMENT SECTION

TIDieR checklist, quantitative fidelity checklists and interview topic guides have been included as supplementary files. Please email the corresponding author at [Polykarpos.nomikos@nottingham.ac.uk](mailto:Polykarpos.nomikos@nottingham.ac.uk) whether further information is required.

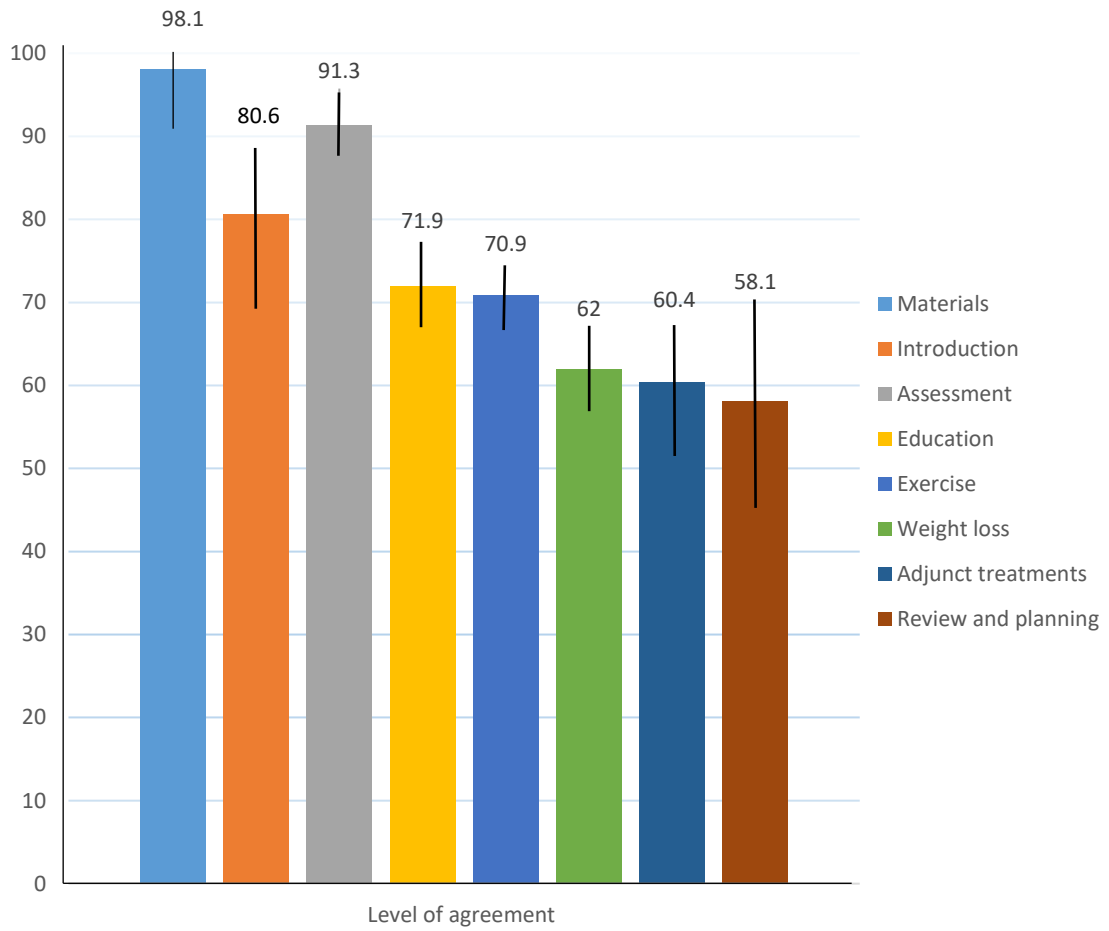



## Additional file 1. Items of the non-pharmacological intervention (TIDieR checklist)

|                              |                                                                                                                                                                                                                                                                                                                                                                                                                                                                                                                                                                                                                                                                                                                                                                                                                                                                                                                                                                                                                                                                                           |
|------------------------------|-------------------------------------------------------------------------------------------------------------------------------------------------------------------------------------------------------------------------------------------------------------------------------------------------------------------------------------------------------------------------------------------------------------------------------------------------------------------------------------------------------------------------------------------------------------------------------------------------------------------------------------------------------------------------------------------------------------------------------------------------------------------------------------------------------------------------------------------------------------------------------------------------------------------------------------------------------------------------------------------------------------------------------------------------------------------------------------------|
| <b>1. Brief name</b>         | Non-pharmacological complex intervention comprised of education, exercise, and weight loss advice if required.                                                                                                                                                                                                                                                                                                                                                                                                                                                                                                                                                                                                                                                                                                                                                                                                                                                                                                                                                                            |
| <b>2. Aims and Rationale</b> | Development and evaluation of the non-pharmacological treatment component.                                                                                                                                                                                                                                                                                                                                                                                                                                                                                                                                                                                                                                                                                                                                                                                                                                                                                                                                                                                                                |
| <b>3. What was done?</b>     | <p><b>Training package of the provider:</b> The content of the package was based on NICE guidelines for the management of OA and a report by Arthritis Research UK on the educational needs of health professionals working with people with OA. The content consisted of a standardised treatment manual. Academic and clinical experts and members of a patient advisory group have provided input into the training package. Their key components were:</p> <ul style="list-style-type: none"> <li>• The epidemiology and nature of knee pain and knee OA</li> <li>• Assessment of the patient with knee OA</li> <li>• Core NICE guidelines for managing OA</li> <li>• Principles of strengthening and aerobic exercise prescription for knee OA</li> <li>• Information and advice to support weight loss</li> <li>• Strategies to support behaviour change</li> <li>• Pharmacological management of OA and knee pain following a step-wise protocol of optimising analgesia</li> </ul> <p><b>Mode of delivery:</b> Four face-to-face individual sessions over a five-week period.</p> |

## Additional file 1. Items of the non-pharmacological intervention (TIDieR checklist)

|                                                                            |                                                                                                                                                                                                                                                                                                                                                                                                             |
|----------------------------------------------------------------------------|-------------------------------------------------------------------------------------------------------------------------------------------------------------------------------------------------------------------------------------------------------------------------------------------------------------------------------------------------------------------------------------------------------------|
| <b>4. Who delivered the intervention ?</b>                                 | A trained nurse with no prior knowledge of treating musculoskeletal conditions delivered the non-pharmacological intervention to knee pain people. A rheumatologist and research physiotherapist delivered in total eight sessions of the module over a three-month period.                                                                                                                                 |
| <b>5. Where was the intervention provided?</b>                             | Single centre research setting, clinic room, city hospital, Nottingham                                                                                                                                                                                                                                                                                                                                      |
| <b>6. When and how often or how much of the intervention was provided?</b> | The complex intervention was delivered for up to 1.5 hours in session one and 46 minutes in the follow up sessions. The nurse was endeavoured to provide as much intervention as an individual could tolerate. The amount of the intervention was video recorded.                                                                                                                                           |
| <b>7. Was the intervention tailored?</b>                                   | Tailoring was built in the intervention. Functional goals were agreed between the nurse and people with knee pain to facilitate exercise prescription. Weight loss goals were agreed with participants who were overweight. The description of the treatment manual highlights procedures for tailoring practice activities. No modifications of the intervention were made during the course of the study. |
| <b>8. How well was the intervention delivered?</b>                         | A single research nurse who received training, delivered the intervention and fidelity was assessed by video recording all sessions. After preliminary fidelity analysis, the nurse received additional supervised training to deliver the intervention.                                                                                                                                                    |

## Additional File 2:

## Quantitative Fidelity Checklist for non-pharmacological component of intervention

| Session 1:                                    |                                                                         | Completed | Not completed | Partially completed | Not applicable |
|-----------------------------------------------|-------------------------------------------------------------------------|-----------|---------------|---------------------|----------------|
| Intervention categories                       | individual components                                                   |           |               |                     |                |
| <b>Materials</b>                              |                                                                         |           |               |                     |                |
|                                               | ARUK booklet on OA                                                      |           |               |                     |                |
|                                               | Exercise/activity diary                                                 |           |               |                     |                |
|                                               | Goal Setting forms                                                      |           |               |                     |                |
| <b>Introduction</b>                           |                                                                         |           |               |                     |                |
|                                               | Introductions                                                           |           |               |                     |                |
|                                               | Aim of interventions                                                    |           |               |                     |                |
|                                               | Content                                                                 |           |               |                     |                |
|                                               | Structure                                                               |           |               |                     |                |
| <b>Holistic assessment of person with OA.</b> |                                                                         |           |               |                     |                |
|                                               | Illness perception of OA explored                                       |           |               |                     |                |
|                                               | Pain severity explored                                                  |           |               |                     |                |
|                                               | Pain impact on occupation or social activity explored                   |           |               |                     |                |
|                                               | Current level of physical activity/ exercise and its intensity explored |           |               |                     |                |
|                                               | Views and attitudes to weight loss explored (if required)               |           |               |                     |                |
|                                               | Issues with mood explored                                               |           |               |                     |                |
|                                               | Sleep quality explored                                                  |           |               |                     |                |
|                                               | Support network and caregiver involvement discussed                     |           |               |                     |                |
|                                               | Co-morbidities                                                          |           |               |                     |                |
|                                               | Other MSK pain                                                          |           |               |                     |                |
|                                               | Inspection of knee                                                      |           |               |                     |                |
|                                               | Palpation of knee                                                       |           |               |                     |                |
|                                               | Active ROM                                                              |           |               |                     |                |
|                                               | Passive ROM                                                             |           |               |                     |                |
|                                               | Observation of Gait                                                     |           |               |                     |                |
| <b>Education</b>                              |                                                                         |           |               |                     |                |
|                                               | Illness perception of OA addressed                                      |           |               |                     |                |
|                                               | Nature of OA discussed                                                  |           |               |                     |                |
|                                               | Core treatments for OA addressed                                        |           |               |                     |                |
|                                               | Rationale for self-management strategies addressed                      |           |               |                     |                |
|                                               | Physical Activity /benefits of exercise addressed                       |           |               |                     |                |
|                                               | Activity rest cycle/pacing explained                                    |           |               |                     |                |
|                                               | Reflection on activity/pacing and recommendations discussed             |           |               |                     |                |
|                                               | Participants had the chance to contribute to discussion                 |           |               |                     |                |
| <b>Exercise</b>                               |                                                                         |           |               |                     |                |
|                                               | Warm up exercises explained/demonstrated                                |           |               |                     |                |
|                                               | Aerobic exercises explained/demonstrated                                |           |               |                     |                |
|                                               | Strengthening explained/demonstrated                                    |           |               |                     |                |
|                                               | Stretching exercises explained/demonstrated                             |           |               |                     |                |
|                                               | Participants had the chance to practice prescribed exercises            |           |               |                     |                |
|                                               | Exercise corrected if required                                          |           |               |                     |                |
|                                               | Smart goals setting                                                     |           |               |                     |                |
|                                               | Action planning to carry out exercise                                   |           |               |                     |                |
|                                               | Patients' level of confidence for the exercise programme determined     |           |               |                     |                |
|                                               | Barriers and facilitators identified (if confidence low)                |           |               |                     |                |
| <b>Weight loss (if required)</b>              |                                                                         |           |               |                     |                |
|                                               | Previous efforts to lose weight discussed                               |           |               |                     |                |

Additional File 2:

Quantitative Fidelity Checklist for non-pharmacological component of intervention

|                                                                                                                                   |  |  |  |  |
|-----------------------------------------------------------------------------------------------------------------------------------|--|--|--|--|
| Healthy BMI range and weight loss discussed                                                                                       |  |  |  |  |
| 5% weight loss goal calculated with timescale                                                                                     |  |  |  |  |
| Agree weight loss goal                                                                                                            |  |  |  |  |
| Action plan for weight loss                                                                                                       |  |  |  |  |
| Discuss strategies for weight loss (calorie deficit, portion size, meal planning, tops tips, slimming groups, increasing PA etc ) |  |  |  |  |
| Signpost to NHS weight loss plan                                                                                                  |  |  |  |  |
| Patients' level of confidence for weight loss goal determined                                                                     |  |  |  |  |
| Barriers and facilitators identified (if confidence low)                                                                          |  |  |  |  |
| <b>Adjunct treatments</b>                                                                                                         |  |  |  |  |
| Use of heat/cold discussed                                                                                                        |  |  |  |  |
| Walking aids discussed                                                                                                            |  |  |  |  |
| Footwear discussed                                                                                                                |  |  |  |  |
| <b>Review and planning</b>                                                                                                        |  |  |  |  |
| Session review: goal setting synopsis and action plan                                                                             |  |  |  |  |

Completed = component was fully delivered by the nurse

Not Completed = component was not delivered by the nurse

Partially completed = there was an attempt to deliver this component by the nurse but it was not delivered fully

Not applicable = component was not applicable for example weight loss components if the participant had a body mass index < 25

## Additional File 2:

## Quantitative Fidelity Checklist for non-pharmacological component of intervention

| <b>Follow up session 2, 3:</b>   |                                                                                   | Completed | Not Completed | Partially completed | Not applicable |
|----------------------------------|-----------------------------------------------------------------------------------|-----------|---------------|---------------------|----------------|
| <b>Intervention categories</b>   | <b>individual components</b>                                                      |           |               |                     |                |
| <b>Assessment</b>                |                                                                                   |           |               |                     |                |
|                                  | Pain symptoms since previous visit explored                                       |           |               |                     |                |
|                                  | Factors influencing pain explored                                                 |           |               |                     |                |
|                                  | Physical activity's levels explored                                               |           |               |                     |                |
| <b>Education</b>                 |                                                                                   |           |               |                     |                |
|                                  | Activity rest cycle/pacing explained                                              |           |               |                     |                |
|                                  | Individual reflection on activity-rest cycle/pacing facilitated                   |           |               |                     |                |
|                                  | Physical activity's levels addressed                                              |           |               |                     |                |
|                                  | Participants had the chance to contribute to discussion                           |           |               |                     |                |
| <b>Exercise</b>                  |                                                                                   |           |               |                     |                |
|                                  | Exercise goals and action plan reviewed                                           |           |               |                     |                |
|                                  | Exercise/activity diary reviewed                                                  |           |               |                     |                |
|                                  | Problem solving of previous weeks action plan                                     |           |               |                     |                |
|                                  | Previous session exercises reviewed and performed by the participant              |           |               |                     |                |
|                                  | Exercise corrected if required                                                    |           |               |                     |                |
|                                  | Smart goals reviewed                                                              |           |               |                     |                |
|                                  | Strengthening exercises progressed or adapted                                     |           |               |                     |                |
|                                  | Aerobic exercises progressed or adapted                                           |           |               |                     |                |
|                                  | Participants had the chance to practice strengthening exercises                   |           |               |                     |                |
|                                  | Patients' level of confidence for the exercise programme determined               |           |               |                     |                |
|                                  | Barriers and facilitators carrying out the exercise identified(if confidence low) |           |               |                     |                |
| <b>Weight loss (if required)</b> |                                                                                   |           |               |                     |                |
|                                  | Weight loss goal and action plan reviewed                                         |           |               |                     |                |
|                                  | Weight reviewed                                                                   |           |               |                     |                |
|                                  | Action plan updated                                                               |           |               |                     |                |
|                                  | Patients' level of confidence for weight loss goal determined                     |           |               |                     |                |
|                                  | Barriers and facilitators identified (if confidence low)                          |           |               |                     |                |
| <b>Adjunct treatments</b>        |                                                                                   |           |               |                     |                |
|                                  | Use of heat/cold discussed                                                        |           |               |                     |                |
|                                  | Walking aids discussed                                                            |           |               |                     |                |
|                                  | Footwear discussed                                                                |           |               |                     |                |
| <b>Review and planning</b>       |                                                                                   |           |               |                     |                |
|                                  | Session review: goal setting synopsis and action plan                             |           |               |                     |                |

## Additional File 2:

## Quantitative Fidelity Checklist for non-pharmacological component of intervention

| <b>Final session:</b>                                                              | Completed | Not completed | Partially completed | Not applicable |
|------------------------------------------------------------------------------------|-----------|---------------|---------------------|----------------|
| <b>Intervention categories</b>                                                     |           |               |                     |                |
| <b>individual components</b>                                                       |           |               |                     |                |
| <b>Assessment</b>                                                                  |           |               |                     |                |
| Pain symptoms since previous visit explored                                        |           |               |                     |                |
| Factors influencing pain explored                                                  |           |               |                     |                |
| Physical activity's levels explored                                                |           |               |                     |                |
| <b>Education</b>                                                                   |           |               |                     |                |
| Long-term self-management addressed                                                |           |               |                     |                |
| Participants had the chance to contribute to discussion                            |           |               |                     |                |
| <b>Exercise</b>                                                                    |           |               |                     |                |
| Exercise goals and action plan reviewed                                            |           |               |                     |                |
| Exercise/activity diary reviewed                                                   |           |               |                     |                |
| Problem solving of previous weeks action plan                                      |           |               |                     |                |
| Participants had the chance to attempt and practice previous exercises             |           |               |                     |                |
| Exercise corrected if required                                                     |           |               |                     |                |
| Patients' level of confidence for the exercise programme determined                |           |               |                     |                |
| Barriers and facilitators carrying out the exercise identified (if confidence low) |           |               |                     |                |
| Exercises aiming for long term management given                                    |           |               |                     |                |
| <b>Weight loss (if required)</b>                                                   |           |               |                     |                |
| Weight loss goal and action plan reviewed                                          |           |               |                     |                |
| Weight reviewed                                                                    |           |               |                     |                |
| Action plan updated                                                                |           |               |                     |                |
| Patients' level of confidence for weight loss goal determined                      |           |               |                     |                |
| Barriers and facilitators identified (if confidence low)                           |           |               |                     |                |
| Long term action plan for weight loss given                                        |           |               |                     |                |
| <b>Review and planning</b>                                                         |           |               |                     |                |
| Session review – long term goal setting and action planning recap                  |           |               |                     |                |

Additional file 3. The semi-structured interview guide for the nurse

## **Nurse's views on experience of delivering the non-pharmacological intervention**

We're going to start by discussing your overall views on the knee pain treatment programme, the training you received to deliver it, and then talk about the different components of the intervention separately.

1. Can you tell me what your overall impression of the knee pain treatment programme is, having delivered it for the first time?

### **Nurse's view of the training received to deliver the non-pharmacological intervention**

We are now going to discuss the training you received to deliver this treatment.

2. Can you tell me how you found the training you received
  - Length of training/ number of sessions/ delivery over weeks rather than 2 days condensed
  - Material covered in sessions: too much/too little/about right
  - Opportunities to practice/ feedback
  - Resources/ manual/ electronic material (links to videos)/ links to weight loss resources / exercise sheets/ case-studies
3. How did you find following the manual provided?
  - Probe – reasons for it being easy / difficult to follow.
  - What suggestions do you have to modify the manual to make it easier to use in the future?
  - Any suggestions for improving the training
- How confident did you feel about delivering the treatment once you had completed your training?

### **Nurse's views on experience of delivering the non-pharmacological intervention**

We are now going to discuss how you found delivering the treatment to patients.

4. How did you find delivering this treatment to patients?
  - As you know, the treatment package had different components – education on self-managing knee pain, giving the participant exercises, advising them on weight loss, setting individual goals with the participants and assessing patient confidence to achieve goals. How did you find delivering these components?
    - [cover ONE at a time]
    - Education
    - Exercise
    - Weight loss
    - Goal setting

1  
2 Additional file 3. The semi-structured interview guide for the nurse  
3

- 4       ○ Assessing patient confidence to achieve goals  
5       ○ Using the diaries (exercise and weight loss)  
6  
7

8 5. How did you find setting goals with patients?  
9

- 10       ○ Probe - did they actively participate in the discussions?  
11

12 6. How did you find the follow-up sessions with participants and providing feedback on participants'  
13 progress with their exercises and/or weight loss?  
14

- 15       ○ Prompts - patient receipt of advice / feedback (any challenges with patients accepting advice  
16 or adhering to the treatment given)  
17  
18

19 • Were there any components that you found challenging to implement?  
20  
21

- 22       ○ What made it challenging to deliver this component? [cover ONE at a time]  
23       ○ Were there any other components that you found challenging to implement? Why.  
24       ○ What would help support you in delivering this in the future?  
25  
26  
27

28 • Were any aspects of the intervention not delivered as planned?  
29  
30

- 31       ○ What were the barriers to delivering [the aspect]? [cover ONE at a time]  
32       ○ What would help support you in delivering this in the future?  
33  
34  
35  
36  
37

38 We are now going to talk about tailoring the treatment to each patient.  
39

40 7. How did you find the final session with the participants? Did you feel that they would be able to  
41 continue with the advice/exercises/weight loss etc independently?  
42  
43  
44

45 We'd now like to discuss the resources provided to support you delivery the treatment programme.  
46  
47

48 8. How useful did you find the other resources during the treatment programme?  
49

- 50       ○ Probe - handouts / training manuals / thera-bands / exercise sheets/ exercise diaries/ NHS  
51 weight loss resource (BMI and weigh loss calculator)/ food diaries/ other weight-loss hand  
52 outs  
53       ○ What suggestions do you have to improve these resources in the future?  
54  
55  
56  
57  
58  
59  
60



1  
2 Additional file 3. The semi-structured interview guide for the nurse  
3

4 9. Is there any additional support you need in being able to deliver this treatment?  
5  
6  
7

8 **We have come to the end of the interview. Do you have any further comments about the training**  
9 **and/or treatment package that have not been covered?**  
10  
11  
12  
13  
14  
15  
16  
17  
18  
19  
20  
21  
22  
23  
24  
25  
26  
27  
28  
29  
30  
31  
32  
33  
34  
35  
36  
37  
38  
39  
40  
41  
42  
43  
44  
45  
46  
47  
48  
49  
50  
51  
52  
53  
54  
55  
56  
57  
58  
59  
60

For peer review only

# Reporting checklist for quality improvement study.

Based on the SQUIRE guidelines.

## Instructions to authors

Complete this checklist by entering the page numbers from your manuscript where readers will find each of the items listed below.

Your article may not currently address all the items on the checklist. Please modify your text to include the missing information. If you are certain that an item does not apply, please write "n/a" and provide a short explanation.

Upload your completed checklist as an extra file when you submit to a journal.

In your methods section, say that you used the SQUIRE reporting guidelines, and cite them as:

Ogrinc G, Davies L, Goodman D, Batalden P, Davidoff F, Stevens D. SQUIRE 2.0 (Standards for Quality Improvement Reporting Excellence): revised publication guidelines from a detailed consensus process

|              | Reporting Item                                                                                                                                                                                                                                   | Page Number |
|--------------|--------------------------------------------------------------------------------------------------------------------------------------------------------------------------------------------------------------------------------------------------|-------------|
| <b>Title</b> | <p><a href="#">#1</a> Indicate that the manuscript concerns an initiative to improve healthcare (broadly defined to include the quality, safety, effectiveness, patientcenteredness, timeliness, cost, efficiency, and equity of healthcare)</p> | 1           |

## Abstract

- [#02a](#) Provide adequate information to aid in searching and indexing 3
- [#02b](#) Summarize all key information from various sections of the text using the abstract format of the intended publication or a structured summary such as: background, local problem, methods, interventions, results, conclusions 2,3

## Introduction

- Problem description** [#3](#) Nature and significance of the local problem 4
- Available knowledge** [#4](#) Summary of what is currently known about the problem, including relevant previous studies 4
- Rationale** [#5](#) Informal or formal frameworks, models, concepts, and / or theories used to explain the problem, any reasons or assumptions that were used to develop the intervention(s), and reasons why the intervention(s) was expected to work 4

- Specific aims** [#6](#) Purpose of the project and of this report 4,5

## Methods

|    |                 |                      |                                                  |           |
|----|-----------------|----------------------|--------------------------------------------------|-----------|
| 1  | Context         | <a href="#">#7</a>   | Contextual elements considered important at      | 6,7       |
| 2  |                 |                      | the outset of introducing the intervention(s)    |           |
| 3  |                 |                      |                                                  |           |
| 4  |                 |                      |                                                  |           |
| 5  |                 |                      |                                                  |           |
| 6  | Intervention(s) | <a href="#">#08a</a> | Description of the intervention(s) in sufficient | 7         |
| 7  |                 |                      | detail that others could reproduce it            |           |
| 8  |                 |                      |                                                  |           |
| 9  |                 |                      |                                                  |           |
| 10 |                 |                      |                                                  |           |
| 11 | Intervention(s) | <a href="#">#08b</a> | Specifics of the team involved in the work       | 7,8       |
| 12 |                 |                      |                                                  |           |
| 13 |                 |                      |                                                  |           |
| 14 |                 |                      |                                                  |           |
| 15 | Study of the    | <a href="#">#09a</a> | Approach chosen for assessing the impact of      | 7,8       |
| 16 |                 |                      | the intervention(s)                              |           |
| 17 | Intervention(s) |                      |                                                  |           |
| 18 |                 |                      |                                                  |           |
| 19 |                 |                      |                                                  |           |
| 20 | Study of the    | <a href="#">#09b</a> | Approach used to establish whether the           | 7,8       |
| 21 |                 |                      | observed outcomes were due to the                |           |
| 22 | Intervention(s) |                      | intervention(s)                                  |           |
| 23 |                 |                      |                                                  |           |
| 24 |                 |                      |                                                  |           |
| 25 |                 |                      |                                                  |           |
| 26 |                 |                      |                                                  |           |
| 27 |                 |                      |                                                  |           |
| 28 | Measures        | <a href="#">#10a</a> | Measures chosen for studying processes           | 8,9,22,23 |
| 29 |                 |                      | and outcomes of the intervention(s),             |           |
| 30 |                 |                      | including rationale for choosing them, their     |           |
| 31 |                 |                      | operational definitions, and their validity and  |           |
| 32 |                 |                      | reliability                                      |           |
| 33 |                 |                      |                                                  |           |
| 34 |                 |                      |                                                  |           |
| 35 |                 |                      |                                                  |           |
| 36 |                 |                      |                                                  |           |
| 37 |                 |                      |                                                  |           |
| 38 |                 |                      |                                                  |           |
| 39 |                 |                      |                                                  |           |
| 40 | Measures        | <a href="#">#10b</a> | Description of the approach to the ongoing       | 9,10      |
| 41 |                 |                      | assessment of contextual elements that           |           |
| 42 |                 |                      | contributed to the success, failure, efficiency, |           |
| 43 |                 |                      | and cost                                         |           |
| 44 |                 |                      |                                                  |           |
| 45 |                 |                      |                                                  |           |
| 46 |                 |                      |                                                  |           |
| 47 |                 |                      |                                                  |           |
| 48 |                 |                      |                                                  |           |
| 49 |                 |                      |                                                  |           |
| 50 | Measures        | <a href="#">#10c</a> | Methods employed for assessing                   | 9         |
| 51 |                 |                      | completeness and accuracy of data                |           |
| 52 |                 |                      |                                                  |           |
| 53 |                 |                      |                                                  |           |
| 54 |                 |                      |                                                  |           |
| 55 | Analysis        | <a href="#">#11a</a> | Qualitative and quantitative methods used to     | 8,9,10    |
| 56 |                 |                      | draw inferences from the data                    |           |
| 57 |                 |                      |                                                  |           |
| 58 |                 |                      |                                                  |           |
| 59 |                 |                      |                                                  |           |
| 60 |                 |                      |                                                  |           |

|    |                        |                      |                                                |                                                |     |
|----|------------------------|----------------------|------------------------------------------------|------------------------------------------------|-----|
| 1  | Analysis               | <a href="#">#11b</a> | Methods for understanding variation within     | 8,9                                            |     |
| 2  |                        |                      |                                                |                                                |     |
| 3  |                        |                      |                                                |                                                |     |
| 4  |                        |                      |                                                | the data, including the effects of time as a   |     |
| 5  |                        |                      |                                                |                                                |     |
| 6  |                        |                      |                                                | variable                                       |     |
| 7  |                        |                      |                                                |                                                |     |
| 8  | Ethical considerations | <a href="#">#12</a>  | Ethical aspects of implementing and studying   | 28                                             |     |
| 9  |                        |                      |                                                |                                                |     |
| 10 |                        |                      |                                                |                                                |     |
| 11 |                        |                      |                                                | the intervention(s) and how they were          |     |
| 12 |                        |                      |                                                |                                                |     |
| 13 |                        |                      |                                                | addressed, including, but not limited to,      |     |
| 14 |                        |                      |                                                |                                                |     |
| 15 |                        |                      | formal ethics review and potential conflict(s) |                                                |     |
| 16 |                        |                      |                                                |                                                |     |
| 17 |                        |                      | of interest                                    |                                                |     |
| 18 |                        |                      |                                                |                                                |     |
| 19 | Results                |                      |                                                |                                                |     |
| 20 |                        |                      |                                                |                                                |     |
| 21 |                        |                      |                                                |                                                |     |
| 22 |                        |                      |                                                |                                                |     |
| 23 |                        |                      |                                                |                                                |     |
| 24 |                        |                      | <a href="#">#13a</a>                           | Initial steps of the intervention(s) and their | 6,7 |
| 25 |                        |                      |                                                |                                                |     |
| 26 |                        |                      | evolution over time (e.g., time-line diagram,  |                                                |     |
| 27 |                        |                      |                                                |                                                |     |
| 28 |                        |                      | flow chart, or table), including modifications |                                                |     |
| 29 |                        |                      |                                                |                                                |     |
| 30 |                        |                      | made to the intervention during the project    |                                                |     |
| 31 |                        |                      |                                                |                                                |     |
| 32 |                        |                      |                                                |                                                |     |
| 33 |                        |                      |                                                |                                                |     |
| 34 |                        | <a href="#">#13b</a> | Details of the process measures and            | 8,9,10                                         |     |
| 35 |                        |                      |                                                |                                                |     |
| 36 |                        |                      | outcome                                        |                                                |     |
| 37 |                        |                      |                                                |                                                |     |
| 38 |                        |                      |                                                |                                                |     |
| 39 |                        | <a href="#">#13c</a> | Contextual elements that interacted with the   | n/a (the intervention was                      |     |
| 40 |                        |                      |                                                |                                                |     |
| 41 |                        |                      | intervention(s)                                | fully monitored)                               |     |
| 42 |                        |                      |                                                |                                                |     |
| 43 |                        |                      |                                                |                                                |     |
| 44 |                        |                      |                                                |                                                |     |
| 45 |                        | <a href="#">#13d</a> | Observed associations between outcomes,        | 12,13                                          |     |
| 46 |                        |                      |                                                |                                                |     |
| 47 |                        |                      | interventions, and relevant contextual         |                                                |     |
| 48 |                        |                      |                                                |                                                |     |
| 49 |                        |                      | elements                                       |                                                |     |
| 50 |                        |                      |                                                |                                                |     |
| 51 |                        |                      |                                                |                                                |     |
| 52 |                        | <a href="#">#13e</a> | Unintended consequences such as                | 12,13 16,17,18                                 |     |
| 53 |                        |                      |                                                |                                                |     |
| 54 |                        |                      | unexpected benefits, problems, failures, or    |                                                |     |
| 55 |                        |                      |                                                |                                                |     |
| 56 |                        |                      | costs associated with the intervention(s).     |                                                |     |
| 57 |                        |                      |                                                |                                                |     |
| 58 |                        |                      |                                                |                                                |     |
| 59 |                        |                      |                                                |                                                |     |
| 60 |                        |                      |                                                |                                                |     |

|    |                   |                      |                                                                                                                 |                                                                                                                               |
|----|-------------------|----------------------|-----------------------------------------------------------------------------------------------------------------|-------------------------------------------------------------------------------------------------------------------------------|
| 1  |                   | <a href="#">#13f</a> | Details about missing data                                                                                      | n/a (no missing data)                                                                                                         |
| 2  |                   |                      |                                                                                                                 |                                                                                                                               |
| 3  |                   |                      |                                                                                                                 |                                                                                                                               |
| 4  |                   |                      |                                                                                                                 |                                                                                                                               |
| 5  |                   |                      |                                                                                                                 |                                                                                                                               |
| 6  |                   |                      |                                                                                                                 |                                                                                                                               |
| 7  |                   |                      |                                                                                                                 |                                                                                                                               |
| 8  |                   |                      |                                                                                                                 |                                                                                                                               |
| 9  |                   |                      |                                                                                                                 |                                                                                                                               |
| 10 |                   |                      |                                                                                                                 |                                                                                                                               |
| 11 | <b>Discussion</b> |                      |                                                                                                                 |                                                                                                                               |
| 12 |                   |                      |                                                                                                                 |                                                                                                                               |
| 13 |                   |                      |                                                                                                                 |                                                                                                                               |
| 14 | Summary           | <a href="#">#14a</a> | Key findings, including relevance to the<br>rationale and specific aims                                         | 22                                                                                                                            |
| 15 |                   |                      |                                                                                                                 |                                                                                                                               |
| 16 |                   |                      |                                                                                                                 |                                                                                                                               |
| 17 |                   |                      |                                                                                                                 |                                                                                                                               |
| 18 |                   |                      |                                                                                                                 |                                                                                                                               |
| 19 | Summary           | <a href="#">#14b</a> | Particular strengths of the project                                                                             | 23,24                                                                                                                         |
| 20 |                   |                      |                                                                                                                 |                                                                                                                               |
| 21 |                   |                      |                                                                                                                 |                                                                                                                               |
| 22 | Interpretation    | <a href="#">#15a</a> | Nature of the association between the<br>intervention(s) and the outcomes                                       | 22,23                                                                                                                         |
| 23 |                   |                      |                                                                                                                 |                                                                                                                               |
| 24 |                   |                      |                                                                                                                 |                                                                                                                               |
| 25 |                   |                      |                                                                                                                 |                                                                                                                               |
| 26 |                   |                      |                                                                                                                 |                                                                                                                               |
| 27 | Interpretation    | <a href="#">#15b</a> | Comparison of results with findings from<br>other publications                                                  | 22,23                                                                                                                         |
| 28 |                   |                      |                                                                                                                 |                                                                                                                               |
| 29 |                   |                      |                                                                                                                 |                                                                                                                               |
| 30 |                   |                      |                                                                                                                 |                                                                                                                               |
| 31 |                   |                      |                                                                                                                 |                                                                                                                               |
| 32 |                   |                      |                                                                                                                 |                                                                                                                               |
| 33 | Interpretation    | <a href="#">#15c</a> | Impact of the project on people and systems                                                                     | n/a (the project determined<br>if it is feasible to apply the<br>non-pharmacological<br>intervention in a feasibility<br>RCT) |
| 34 |                   |                      |                                                                                                                 |                                                                                                                               |
| 35 |                   |                      |                                                                                                                 |                                                                                                                               |
| 36 |                   |                      |                                                                                                                 |                                                                                                                               |
| 37 |                   |                      |                                                                                                                 |                                                                                                                               |
| 38 |                   |                      |                                                                                                                 |                                                                                                                               |
| 39 |                   |                      |                                                                                                                 |                                                                                                                               |
| 40 |                   |                      |                                                                                                                 |                                                                                                                               |
| 41 |                   |                      |                                                                                                                 |                                                                                                                               |
| 42 |                   |                      |                                                                                                                 |                                                                                                                               |
| 43 |                   |                      |                                                                                                                 |                                                                                                                               |
| 44 |                   |                      |                                                                                                                 |                                                                                                                               |
| 45 | Interpretation    | <a href="#">#15d</a> | Reasons for any differences between<br>observed and anticipated outcomes,<br>including the influence of context | 24                                                                                                                            |
| 46 |                   |                      |                                                                                                                 |                                                                                                                               |
| 47 |                   |                      |                                                                                                                 |                                                                                                                               |
| 48 |                   |                      |                                                                                                                 |                                                                                                                               |
| 49 |                   |                      |                                                                                                                 |                                                                                                                               |
| 50 |                   |                      |                                                                                                                 |                                                                                                                               |
| 51 |                   |                      |                                                                                                                 |                                                                                                                               |
| 52 |                   |                      |                                                                                                                 |                                                                                                                               |
| 53 | Interpretation    | <a href="#">#15e</a> | Costs and strategic trade-offs, including<br>opportunity costs                                                  | n/a (The study did not<br>assess cost-effectiveness)                                                                          |
| 54 |                   |                      |                                                                                                                 |                                                                                                                               |
| 55 |                   |                      |                                                                                                                 |                                                                                                                               |
| 56 |                   |                      |                                                                                                                 |                                                                                                                               |
| 57 |                   |                      |                                                                                                                 |                                                                                                                               |
| 58 | Limitations       | <a href="#">#16a</a> | Limits to the generalizability of the work                                                                      | 23                                                                                                                            |
| 59 |                   |                      |                                                                                                                 |                                                                                                                               |
| 60 |                   |                      |                                                                                                                 |                                                                                                                               |

|    |                    |                      |                                                 |       |
|----|--------------------|----------------------|-------------------------------------------------|-------|
| 1  | Limitations        | <a href="#">#16b</a> | Factors that might have limited internal        | 24    |
| 2  |                    |                      | validity such as confounding, bias, or          |       |
| 3  |                    |                      | imprecision in the design, methods,             |       |
| 4  |                    |                      | measurement, or analysis                        |       |
| 5  |                    |                      |                                                 |       |
| 6  | Limitations        | <a href="#">#16c</a> | Efforts made to minimize and adjust for         | 24    |
| 7  |                    |                      | limitations                                     |       |
| 8  |                    |                      |                                                 |       |
| 9  |                    |                      |                                                 |       |
| 10 |                    |                      |                                                 |       |
| 11 | Conclusion         | <a href="#">#17a</a> | Usefulness of the work                          | 25    |
| 12 |                    |                      |                                                 |       |
| 13 | Conclusion         | <a href="#">#17b</a> | Sustainability                                  | 23,24 |
| 14 |                    |                      |                                                 |       |
| 15 | Conclusion         | <a href="#">#17c</a> | Potential for spread to other contexts          | 23,24 |
| 16 |                    |                      |                                                 |       |
| 17 | Conclusion         | <a href="#">#17d</a> | Implications for practice and for further study | 24,25 |
| 18 |                    |                      | in the field                                    |       |
| 19 |                    |                      |                                                 |       |
| 20 | Conclusion         | <a href="#">#17e</a> | Suggested next steps                            | 25    |
| 21 |                    |                      |                                                 |       |
| 22 |                    |                      |                                                 |       |
| 23 | <b>Other</b>       |                      |                                                 |       |
| 24 | <b>information</b> |                      |                                                 |       |
| 25 |                    |                      |                                                 |       |
| 26 | Funding            | <a href="#">#18</a>  | Sources of funding that supported this work.    | 28    |
| 27 |                    |                      | Role, if any, of the funding organization in    |       |
| 28 |                    |                      | the design, implementation, interpretation,     |       |
| 29 |                    |                      | and reporting                                   |       |
| 30 |                    |                      |                                                 |       |

## Notes:

- 13c: n/a (the intervention was fully monitored)
- 13e: 11,12, 15,16,17

- 1 • 13f: n/a (no missing data as all intervention sessions were video recorded)
- 2
- 3
- 4 • 15c: n/a (the project determined if it is feasible to apply the non-pharmacological intervention in a
- 5 feasibility RCT)
- 6
- 7
- 8
- 9 • 15e: n/a (The study did not consider cost-effectiveness) The SQUIRE 2.0 checklist is distributed
- 10 under the terms of the Creative Commons Attribution License CC BY-NC 4.0. This checklist was
- 11 completed on 22. September 2020 using <https://www.goodreports.org/>, a tool made by the
- 12
- 13 [EQUATOR Network](#) in collaboration with [Penelope.ai](#)
- 14
- 15
- 16
- 17
- 18
- 19
- 20
- 21
- 22
- 23
- 24
- 25
- 26
- 27
- 28
- 29
- 30
- 31
- 32
- 33
- 34
- 35
- 36
- 37
- 38
- 39
- 40
- 41
- 42
- 43
- 44
- 45
- 46
- 47
- 48
- 49
- 50
- 51
- 52
- 53
- 54
- 55
- 56
- 57
- 58
- 59
- 60



# BMJ Open

## Fidelity assessment of nurse-led non-pharmacological package of care for knee pain in the package development phase of a feasibility randomised controlled trial based in secondary-care: a mixed methods study

|                                 |                                                                                                                                                                                                                                                                                                                                                                                                                                                                                                                                                                                                                                                                                                                                                                                                                                                                                                                                                                                                                                                                                                                                                                                                                                                                                                                                                                                  |
|---------------------------------|----------------------------------------------------------------------------------------------------------------------------------------------------------------------------------------------------------------------------------------------------------------------------------------------------------------------------------------------------------------------------------------------------------------------------------------------------------------------------------------------------------------------------------------------------------------------------------------------------------------------------------------------------------------------------------------------------------------------------------------------------------------------------------------------------------------------------------------------------------------------------------------------------------------------------------------------------------------------------------------------------------------------------------------------------------------------------------------------------------------------------------------------------------------------------------------------------------------------------------------------------------------------------------------------------------------------------------------------------------------------------------|
| Journal:                        | <i>BMJ Open</i>                                                                                                                                                                                                                                                                                                                                                                                                                                                                                                                                                                                                                                                                                                                                                                                                                                                                                                                                                                                                                                                                                                                                                                                                                                                                                                                                                                  |
| Manuscript ID                   | bmjopen-2020-045242.R1                                                                                                                                                                                                                                                                                                                                                                                                                                                                                                                                                                                                                                                                                                                                                                                                                                                                                                                                                                                                                                                                                                                                                                                                                                                                                                                                                           |
| Article Type:                   | Original research                                                                                                                                                                                                                                                                                                                                                                                                                                                                                                                                                                                                                                                                                                                                                                                                                                                                                                                                                                                                                                                                                                                                                                                                                                                                                                                                                                |
| Date Submitted by the Author:   | 02-Mar-2021                                                                                                                                                                                                                                                                                                                                                                                                                                                                                                                                                                                                                                                                                                                                                                                                                                                                                                                                                                                                                                                                                                                                                                                                                                                                                                                                                                      |
| Complete List of Authors:       | Nomikos, Polykarpos; University of Nottingham, Academic Rheumatology ; University of Nottingham, NIHR Nottingham Biomedical Research Centre<br>Hall, Michelle; University of Nottingham, NIHR Nottingham Biomedical Research Centre ; University of Nottingham, School of Health Sciences<br>Fuller, Amy; University of Nottingham, Academic Rheumatology ; University of Nottingham, NIHR Nottingham Biomedical Research Centre<br>Millar, Bonnie; University of Nottingham, NIHR Nottingham Biomedical Research Centre ; University of Nottingham, Pain Centre Versus Arthritis<br>Ogollah, Reuben; University of Nottingham, Nottingham Clinical Trials Unit<br>Valdes, A; University of Nottingham, NIHR Nottingham Biomedical Research Centre ; University of Nottingham, Pain Centre Versus Arthritis<br>Doherty, Michael ; University of Nottingham, Academic Rheumatology ; University of Nottingham, Pain Centre Versus Arthritis<br>Walsh, David; University of Nottingham, NIHR Nottingham Biomedical Research Centre ; University of Nottingham, Pain Centre Versus Arthritis<br>dasNair, Roshan; University of Nottingham, Institute of Mental Health; University of Nottingham, Division of Psychiatry & Applied Psychology<br>Abhishek, A; University of Nottingham, Academic Rheumatology ; University of Nottingham, NIHR Nottingham Biomedical Research Centre |
| <b>Primary Subject Heading</b>: | Rheumatology                                                                                                                                                                                                                                                                                                                                                                                                                                                                                                                                                                                                                                                                                                                                                                                                                                                                                                                                                                                                                                                                                                                                                                                                                                                                                                                                                                     |
| Secondary Subject Heading:      | Nursing                                                                                                                                                                                                                                                                                                                                                                                                                                                                                                                                                                                                                                                                                                                                                                                                                                                                                                                                                                                                                                                                                                                                                                                                                                                                                                                                                                          |
| Keywords:                       | Knee < ORTHOPAEDIC & TRAUMA SURGERY, Rheumatology < INTERNAL MEDICINE, Musculoskeletal disorders < ORTHOPAEDIC & TRAUMA SURGERY                                                                                                                                                                                                                                                                                                                                                                                                                                                                                                                                                                                                                                                                                                                                                                                                                                                                                                                                                                                                                                                                                                                                                                                                                                                  |
|                                 |                                                                                                                                                                                                                                                                                                                                                                                                                                                                                                                                                                                                                                                                                                                                                                                                                                                                                                                                                                                                                                                                                                                                                                                                                                                                                                                                                                                  |

SCHOLARONE™  
Manuscripts

1  
2  
3  
4  
5  
6  
7  
8  
9  
10  
11  
12  
13  
14  
15  
16  
17  
18  
19  
20  
21  
22  
23  
24  
25  
26  
27  
28  
29  
30  
31  
32  
33  
34  
35  
36  
37  
38  
39  
40  
41  
42  
43  
44  
45  
46  
47  
48  
49  
50  
51  
52  
53  
54  
55  
56  
57  
58  
59  
60



I, the Submitting Author has the right to grant and does grant on behalf of all authors of the Work (as defined in the below author licence), an exclusive licence and/or a non-exclusive licence for contributions from authors who are: i) UK Crown employees; ii) where BMJ has agreed a CC-BY licence shall apply, and/or iii) in accordance with the terms applicable for US Federal Government officers or employees acting as part of their official duties; on a worldwide, perpetual, irrevocable, royalty-free basis to BMJ Publishing Group Ltd ("BMJ") its licensees and where the relevant Journal is co-owned by BMJ to the co-owners of the Journal, to publish the Work in this journal and any other BMJ products and to exploit all rights, as set out in our [licence](#).

The Submitting Author accepts and understands that any supply made under these terms is made by BMJ to the Submitting Author unless you are acting as an employee on behalf of your employer or a postgraduate student of an affiliated institution which is paying any applicable article publishing charge ("APC") for Open Access articles. Where the Submitting Author wishes to make the Work available on an Open Access basis (and intends to pay the relevant APC), the terms of reuse of such Open Access shall be governed by a Creative Commons licence – details of these licences and which [Creative Commons](#) licence will apply to this Work are set out in our licence referred to above.

Other than as permitted in any relevant BMJ Author's Self Archiving Policies, I confirm this Work has not been accepted for publication elsewhere, is not being considered for publication elsewhere and does not duplicate material already published. I confirm all authors consent to publication of this Work and authorise the granting of this licence.

1  
2  
3  
4 Fidelity assessment of nurse-led non-pharmacological package of care for knee pain  
5 in the package development phase of a feasibility randomised controlled trial based  
6 in secondary-care: a mixed methods study  
7  
8  
9

10  
11 Polykarpos Angelos Nomikos<sup>1,2</sup>, Michelle Hall<sup>2,3</sup>, Amy Fuller<sup>1,2</sup>, Bonnie Millar<sup>2,4</sup>,  
12 Reuben Ogollah<sup>5</sup>, Ana M Valdes<sup>2,4</sup>, Michael Doherty<sup>1,4</sup>, David A Walsh<sup>2,4</sup>, Roshan  
13 das Nair<sup>6,7</sup>, Abhishek Abhishek<sup>1,2</sup>  
14  
15  
16

17 <sup>1</sup> Academic Rheumatology, University of Nottingham, Nottingham, UK

18  
19 <sup>2</sup> NIHR Nottingham Biomedical Research Centre, University of Nottingham,  
20 Nottingham, UK  
21  
22

23 <sup>3</sup> School of Health Sciences, University of Nottingham, Nottingham, UK

24  
25 <sup>4</sup> Pain Centre Versus Arthritis, University of Nottingham, Nottingham, UK  
26  
27

28 <sup>5</sup> Nottingham Clinical Trials Unit, University of Nottingham, Nottingham, UK  
29  
30

31 <sup>6</sup> Institute of Mental Health, University of Nottingham, Nottingham, UK  
32  
33

34 <sup>7</sup> Division of Psychiatry & Applied Psychology, University of Nottingham,  
35 Nottingham, UK  
36

37 Corresponding author:

38 Polykarpos Angelos Nomikos

39 A 26 Clinical Sciences Building

40 Nottingham City Hospital

41 Hucknall Road

42 Nottingham

43 NG5 1PB

44 UK

45 E-mail address: Polykarpos.nomikos@nottingham.ac.uk

46  
47  
48  
49  
50  
51  
52  
53  
54  
55  
56  
57  
58  
59  
60  
Word count (excluding title page, abstract, references, figures and tables): 4618

## ABSTRACT

**Objectives:** To evaluate fidelity of delivery of a nurse-led non-pharmacological complex intervention for knee pain.

**Setting:** Secondary care. Single centre study.

**Study design:** Mixed methods study.

**Participants:** Eighteen adults with chronic knee pain.

**Inclusion criteria:** Age > 40 years, knee pain present for longer than 3 months, knee pain for most days of the previous month, at least moderate pain in two of the five domains of Western Ontario and McMaster Universities Osteoarthritis Index pain scale.

**Interventions:** Nurse-led non-pharmacological intervention comprising assessment, education, exercise, use of hot/cold treatments, footwear modification, walking aids, and weight-loss advice (if required).

**Outcome(s):** Primary: Fidelity of delivery of intervention, Secondary: nurses' experience of delivering intervention.

**Methods:** Each intervention session with every participant was video recorded and formed part of fidelity assessment. Fidelity checklists were completed by the research nurse after each session and by an independent researcher, after viewing the video-recordings blinded to nurse ratings. Fidelity scores (%), percentage agreement and 95% Confidence Intervals (CI) were calculated. Two semi-structured interviews were conducted with the research nurse.

**Results:** Fourteen participants completed all visits. 62 treatment sessions took place. Nurse self-report and assessor video rating scores for all 62 treatment sessions were

1  
2  
3 included in fidelity assessment. Overall fidelity was higher on nurse self-report (97.7%)  
4 than on objective video-rating (84.2%). Percentage agreement between nurse self-  
5 report and video-rating was 73.3% (95% CI: 71.3 - 75.3). Fidelity was lowest for advice  
6 on footwear and walking aids. The nurse reported difficulty advising on thermal  
7 treatments, footwear and walking aids, and did not feel confident negotiating  
8 achievable and realistic goals with participants.  
9

10  
11  
12 **Conclusions:** A trained research nurse can deliver most components of a non-  
13 pharmacological intervention for knee pain to a high degree of fidelity. Future research  
14 should assess intervention fidelity in a routine clinical setting, and examine its clinical  
15 and cost-effectiveness.  
16

17  
18  
19  
20  
21  
22  
23  
24  
25  
26  
27 **Trial registration number:** NCT03670706  
28

29  
30  
31  
32 **KEY WORDS:** Knee pain, fidelity, nurse-led intervention, osteoarthritis  
33  
34  
35  
36  
37

### 38 **STRENGTHS AND LIMITATIONS OF THE STUDY**

- 39  
40  
41 • This mixed methods study used a combination of techniques to assess treatment  
42 fidelity.  
43
- 44  
45 • We triangulated the fidelity scores with the findings from interview study and  
46 found convergence providing internal validity.  
47
- 48  
49 • We identified the components not delivered as intended.  
50
- 51  
52 • A single nurse was involved in delivery of the intervention  
53
- 54  
55 • Lack of formal assessment of nurse knowledge of managing knee osteoarthritis.  
56  
57  
58  
59  
60

## INTRODUCTION

Osteoarthritis (OA) is the commonest form of arthritis and is managed predominantly in primary care in the UK. The knee is commonly affected, with approximately one in four adults over the age of 50 years in the UK self-reporting chronic knee pain, defined as pain for 3-months or longer within the previous 12 months.<sup>1</sup> In the presence of activity related joint pain, no or minimal morning stiffness, and age  $\geq$  45 years, a clinical diagnosis of OA may be reached without the need of investigations (e.g. blood tests or radiography) as per the National Institute for Health and Care Excellence (NICE) guidelines.<sup>2</sup> These guidelines<sup>2</sup> also recommend a patient-centred approach when managing OA, with a focus on non-pharmacological interventions including education, strengthening, and aerobic exercise, and weight loss if required. However, this can be difficult for general practitioners (GPs) to deliver for several reasons such as time constraints and, core non-pharmacological treatments are under-utilised.<sup>3 4</sup> Nurse-led care gives similar or better outcomes than GP-led care for other chronic diseases.<sup>5-8</sup> However, the fidelity of delivery of nurse-led care has not been examined for the management of knee OA.

Fidelity, defined as the degree to which an intervention is delivered as intended,<sup>9</sup> regulates the relationship between interventions and outcomes, and determines the extent to which an intervention affects the outcome.<sup>10</sup> Inferences regarding treatment effect of a complex intervention should therefore not be made without assessing fidelity, because lack of efficacy of an intervention may be due to inadequate implementation.<sup>11</sup> Thus, the fidelity of intervention delivery influences the internal and external validity of a study.<sup>12</sup> If fidelity is not assessed, effective interventions may be rejected due to poor delivery.<sup>13 14</sup>

1  
2  
3 There are several methods to assess treatment fidelity, including direct observation,  
4 patient self-report questionnaire, provider self-report checklist, and indirect  
5 observation using audio or video-recordings.<sup>13</sup>, which may be used singularly or in  
6 combination. Direct observation is considered the gold-standard, however, it can be  
7 intrusive and may affect patient practitioner interaction,<sup>15 16</sup> and may not be feasible  
8 in large randomised controlled trials (RCTs). Provider self-report methods are simple  
9 and inexpensive but can be inaccurate,<sup>17</sup> and patient report methods are even less  
10 reliable.<sup>13</sup> Video-recording the delivery of intervention and independent assessment  
11 of fidelity may provide a robust alternative to direct observation.<sup>18</sup> Indeed,<sup>19 20</sup> it has  
12 been shown previously that assessing fidelity using independently rated recordings  
13 and provider self-report checklist is feasible and acceptable.<sup>21</sup> A combination of  
14 provider self-report and independent assessed video recording was utilised in the  
15 current study to provide an in-depth fidelity assessment.<sup>22</sup> Video recordings were  
16 chosen as this is less intrusive than direct observation and provide an opportunity to  
17 assess reliability.

18  
19  
20  
21  
22  
23  
24  
25  
26  
27  
28  
29  
30  
31  
32  
33  
34  
35  
36  
37  
38 Medical Research Council guidelines for developing and evaluating complex  
39 interventions<sup>23</sup> have highlighted the importance of conducting process evaluation. Its'  
40 purpose is to assess the quality and quantity of the implementation of intervention,  
41 and trials that collect rich qualitative data may identify potential barriers and facilitators  
42 to intervention implementation. However, collecting only qualitative or quantitative  
43 data to assess treatment delivery would not unearth a comprehensive picture to  
44 understand complex constructs within the intervention.<sup>24</sup> For this reason, a mixed  
45 methods approach was utilised.<sup>25</sup>

46  
47  
48  
49  
50  
51  
52  
53  
54  
55  
56  
57  
58  
59  
60  
The present study is part of the East-Midlands Knee Pain Cohort RCT study,<sup>26</sup> the  
overall purpose of which is to evaluate the feasibility of a nurse-led package of care



1  
2  
3 for knee pain due to OA. The objective of the present study was to evaluate the fidelity  
4 of delivery of a nurse-led non-pharmacological package of care for knee pain during  
5 the package development phase of the RCT.  
6  
7  
8  
9  
10  
11  
12  
13  
14  
15  
16  
17  
18  
19  
20  
21  
22  
23  
24  
25  
26  
27  
28  
29  
30  
31  
32  
33  
34  
35  
36  
37  
38  
39  
40  
41  
42  
43  
44  
45  
46  
47  
48  
49  
50  
51  
52  
53  
54  
55  
56  
57  
58  
59  
60

For peer review only

## METHODS

**Study Design:** A mixed methods study with an explanatory sequential and convergent design. This form of mixed methods approach was used to produce additional insights of the issue at hand. In this design, qualitative and quantitative data are collected and complementary results arise from the use of different methods.<sup>27</sup> In the current study, the quantitative data informed the collection of qualitative data and a convergence approach was followed.

**Setting:** Academic Rheumatology, City Hospital Nottingham.

**Participants and Recruitment:** The participants were adults self-reporting knee pain. Community dwelling adults participating in the Investigating Musculoskeletal Health and Wellbeing (IMHW) cohort,<sup>28</sup> self-reporting knee pain were sent a postal invitation to participate in this study. People who responded underwent telephone screening to assess eligibility. The inclusion criteria were: age > 40 years, ability to read and write in English, knee pain present for longer than three months, pain in or around the knee on most days of the previous month, and at least moderate pain in two of the five domains of the Western Ontario and McMaster Universities Osteoarthritis Index (WOMAC) pain scale.<sup>29</sup>

**Research nurse training:** A training programme to enable a nurse to deliver the current NICE guidelines for OA management was developed and an educational manual produced.<sup>26</sup> The training included face-to-face learning, case-studies, on-line resources and simulated patients. Practical sessions on assessing the participant, delivering and modifying exercise, weight loss advice and use of strategies to encourage adherence were also included. The nurse delivering the intervention was working as a research nurse previously and did not have prior knowledge of musculoskeletal diseases, had not worked in rheumatology or allied specialties such

1  
2  
3 as orthopaedics, rehabilitation or sports medicine, and had never delivered treatments  
4  
5 for arthritis.  
6  
7

8 **Patient and Public Involvement:** Three PPI members with hip and/or knee OA  
9  
10 provided input into the content of the non-pharmacological treatment package, and  
11  
12 volunteered for nurse training. They advised that video recording of treatment sessions  
13  
14 would be acceptable to participants.  
15  
16

17  
18 **Intervention:** The template for intervention description and replication (TIDieR)  
19  
20 checklist <sup>30</sup> has been used to describe the intervention and its key features (Additional  
21  
22 file 1). In brief, the intervention consisted of a holistic assessment of the participant,  
23  
24 providing education about the nature of OA and self-management strategies including  
25  
26 advice on the role of exercise, maintaining a healthy weight, and use of adjunctive  
27  
28 treatments such as application of heat or cold, foot-wear modification and use of  
29  
30 walking aids. At the first visit, the nurse took a medical history, examined the knee  
31  
32 joints and explained to the participant that they had knee pain due to OA.  
33  
34 Investigations and radiographs were not undertaken as per NICE guidelines. <sup>2</sup> The  
35  
36 Chief Investigator (AA) was available for advice if a clinical diagnosis of OA could not  
37  
38 be reached. In that case, the participant would be deemed ineligible for the study. All  
39  
40 participants were given an Arthritis Research UK leaflet on knee OA. The nurse  
41  
42 explained aerobic and strengthening exercises and advised each participant on an  
43  
44 individualised regimen that was mutually agreed. If required, weight-loss advice was  
45  
46 provided. Behaviour change strategies <sup>31</sup> such as goal setting, action planning,  
47  
48 assessment of participant confidence to achieve goals, discussion of barriers and  
49  
50 facilitators and the use of exercise diaries were used to improve adherence. Functional  
51  
52 goals were agreed and were used to facilitate the exercise prescription with goals  
53  
54 being Specific, Measurable, Achievable, Relevant, and Timely (SMART). SMART  
55  
56  
57  
58  
59  
60

1  
2  
3 weight loss goals were agreed also with overweight participants. The intervention is  
4 described in more detail in the protocol.<sup>26</sup> After the training period, the nurse delivered  
5 the intervention in four sessions over a five-week period.  
6  
7  
8

9  
10 **Ethical approval:** The study received ethical approval by the East Midlands-Derby  
11 Research Ethics Committee (REC) (18/EM/0288).  
12  
13

14  
15 **Consent:** All study participants including the research nurse gave their written  
16 informed consent prior to treatment delivery, including the consent to video record the  
17 sessions. Participants had the right to pause or stop the video recording at any point  
18 without giving any reasons.  
19  
20  
21  
22  
23

24  
25 **Fidelity assessment:** The study followed the National Institutes of Health Behaviour  
26 Change Consortium (NIHBCC) guidelines for fidelity assessment.<sup>13</sup> The fidelity  
27 checklist was developed a priori<sup>26</sup> and comprised eight components, each with  
28 specific tasks: materials; introduction; assessment; education; exercise; weight loss;  
29 advice on adjunctive treatments; and review and planning. However, not all  
30 components of the intervention were intended to be delivered in each session.<sup>26</sup> For  
31 example, advice on the adjunctive treatments could be provided in any of the four  
32 sessions. The fidelity checklist was iteratively developed using a five-step  
33 methodology.<sup>32</sup> These were: reviewing previous measures, analysing intervention  
34 components and developing an intervention framework (intervention manual),  
35 developing the fidelity checklist, obtaining feedback about the content and wording of  
36 checklist and piloting and refining the checklist to assess and improve reliability. The  
37 responses of the fidelity checklist were categorical and rated as completed, partially  
38 completed, not completed, or not applicable. Partially completed scores were given  
39 for any task that was not delivered to the full extent in the context of that particular  
40  
41  
42  
43  
44  
45  
46  
47  
48  
49  
50  
51  
52  
53  
54  
55  
56  
57  
58  
59  
60

1  
2  
3 consultation. The scoring criteria of the fidelity checklist followed that of previous  
4 published strategies for assessing fidelity in RCTs of complex interventions.<sup>33</sup>  
5  
6  
7

8 Eighteen participants received the non-pharmacological intervention and all (n=62)  
9 sessions were video-recorded. After every session with the participant, the nurse  
10 completed the fidelity checklist. Sixty-two checklists, 18 for session 1, 16 for session  
11 2 and 14 each for sessions 3 and 4 were completed. Blinded to the nurse ratings, the  
12 video-recording of every session was independently reviewed and rated by PAN. A  
13 second-rater (MH) independently rated 20% (n=12) of the sessions. Both raters were  
14 familiar with the intervention. The refinement, reliability, and feasibility of the fidelity  
15 checklist was established during the initial phases of the data collection process.  
16  
17  
18  
19  
20  
21  
22  
23  
24  
25

26  
27 **Quantitative data analysis:** Mean and standard deviation (SD), median and inter  
28 quartile range (IQR), and n (%), were calculated for descriptive purposes. Within a  
29 component, tasks rated as 'completed' were given a score of 2, 'partially completed' a  
30 score of 1, and not completed, a score of zero. To obtain fidelity score for a component  
31 of the intervention, individual scores for each task within the component were added  
32 and divided by the maximum possible score for that component and converted to a  
33 percentage. Any tasks that were rated as not-applicable, were excluded from the  
34 calculation.  
35  
36  
37  
38  
39  
40  
41  
42  
43  
44

45  
46 Median fidelity scores (%) and IQR were calculated for the entire intervention, per  
47 participant, per session and per component of the intervention. Fidelity was classified  
48 as previously reported: 80-100% 'high', 51-79% 'moderate', and 0-50% 'low' fidelity.  
49  
50

51  
52 <sup>34</sup> Where fidelity was moderate or low in a particular component, we further explored  
53 this by examining the fidelity of delivery of the individual tasks.  
54  
55  
56  
57  
58  
59  
60

1  
2  
3 Percentage agreement with 95% confidence intervals (CI) was used to estimate the  
4 level of agreement between self-report and video-record methods, and for inter-rater  
5 agreement.  
6  
7  
8  
9

10 **Qualitative phase:** One week after the final session, the nurse took part in a semi-  
11 structured interview conducted by PAN (PhD student) and AF (trained qualitative  
12 researcher). The interview guide (Additional file 2) contained open-ended questions  
13 developed by the study team, which included a rheumatologist (AA), physiotherapists  
14 (MH, PAN), psychologist (RdN), and qualitative researcher (AF). The guide covered  
15 the nurse's view on their training, confidence in and experience of delivering the  
16 individual components of the non-pharmacological intervention, perceived barriers to  
17 delivering it as planned, and opportunities to improve the non-pharmacological  
18 package of care. An iterative process was used for data collection, so an additional  
19 interview was conducted 45 weeks later to capture any salient points raised from the  
20 initial quantitative and qualitative data collected.  
21  
22  
23  
24  
25  
26  
27  
28  
29  
30  
31  
32  
33  
34  
35

36 Before starting the interview, it was explained that the nurse's responses would remain  
37 confidential and that any quotes included in future publications would not identify them.  
38  
39 The nurse was informed of the right to withdraw from the interview at any time. We  
40 have not provided demographic details in order to protect the anonymity of the  
41 individual nurse. All interviews were conducted in a private room in Academic  
42 Rheumatology, City Hospital, Nottingham. The qualitative findings were mapped onto  
43 the fidelity checklist to assess convergence between the quantitative and qualitative  
44 findings. Any areas of uncertainty or gaps were then explored in the second interview  
45 with the nurse.  
46  
47  
48  
49  
50  
51  
52  
53  
54  
55  
56  
57  
58  
59  
60

1  
2  
3 **Qualitative data analysis:** The interviews were transcribed verbatim by an external  
4 transcription company. The interviewer removed any identifiers and ensured  
5 transcripts were accurate. Transcripts were analysed following the principles of the  
6 general inductive approach.<sup>35</sup> The latter is a simple straightforward approach, which  
7 is used to derive findings from raw qualitative data, condense them into a brief  
8 summary format, and link the research objectives with the summary findings.  
9

10  
11  
12 The first transcript was read several times before data related to the research  
13 objectives was identified, labelled and categorised. The categories were discussed  
14 between the interviewer and a second researcher (AF). This process identified gaps  
15 and led to the second interview and the transcript was analysed in the same way.  
16 Following agreement that the categories reflected the overall account reported by the  
17 nurse, extracts were taken from the transcripts to exemplify the findings.  
18  
19

20  
21 **Convergence:** A meta-matrix was developed to explore convergence between the  
22 findings. This approach enhances study validity by increasing the probability that our  
23 findings and interpretations are credible and reliable.<sup>24</sup> Convergence was defined as  
24 agreement between both sets of data, and discrepancy as disagreement between  
25 them.  
26  
27

28  
29 **Reporting guidelines:** The Standards for Quality Improvement Reporting Excellence  
30 (SQUIRE) guidelines<sup>36</sup> were used to improve the quality of reporting of this study.  
31  
32  
33  
34  
35  
36  
37  
38  
39  
40  
41  
42  
43  
44  
45  
46  
47  
48  
49  
50  
51  
52  
53  
54  
55  
56  
57  
58  
59  
60

## RESULTS

### Quantitative findings:

Eighteen participants (33% women) with knee pain for longer than 3 months, with a mean age of 68.7 (SD 9.0) years and body mass index of 31.2 (SD 8.4) kg/m<sup>2</sup> respectively took part in the study. Of these, fourteen completed all four visits. The reasons for dropping out were other commitments (n=3), reluctance to lose weight (n=1) and inadequate understanding of the nature of the intervention (n=1).

In total, 62 intervention sessions were delivered. The median (IQR) duration of the initial and follow-up sessions was 87 (81–101) and 46 (37–52) minutes respectively. Overall fidelity was rated high for both nurse self-report (97.7%) and video-rated scores (84.2%) (Tables 1, 2). Inter-rater agreement for the video-recording checklist was 70.3% (95%CI 64.4, 74.2).

For the nurse self-report checklist, median fidelity scores for each session ranged from 94.4-100% (Table 1). Individual components received high ratings except for adjunctive treatments i.e. use of heat/cold therapy and advice on footwear where the fidelity score was moderate in many sessions.

For the video-rated checklists, overall median fidelity scores for each session ranged from 77.7-87.2% (Table 2). Fidelity for education was lower in the first session (78.1%, IQR 74.1, 93.8) but increased in the follow-up session (87.5%, IQR 50,100). Fidelity for review and planning was lower in the first and last sessions. Fidelity scores were low for adjunctive treatments across all sessions, and varied from 0% to 50%. Fidelity of delivery for exercise goal-setting was moderate at 66% and, fidelity for reviewing goals during follow-up sessions was low, ranging between 44-50%. Additionally,



1  
2  
3 assessment of patients' level of confidence to achieve their exercise goal was low in  
4  
5 the follow-up sessions, ranging between 7-40%.  
6  
7

8 The overall agreement between nurse-rated and video-rated methods was 73.3%  
9  
10 (95% CI 71.3 - 75.3). The level of agreement for individual components is shown in  
11  
12 Figure 1. Excellent agreement was found for materials, introduction, and assessment.  
13  
14 Agreement was below the cut-off point of 80% for education, exercise, weight loss and  
15  
16 adjunctive treatment. The level of agreement for review and planning component was  
17  
18 58.1% (95% CI 44.8, 70.5). For individual participants, overall fidelity across the four  
19  
20 sessions ranged from 75% to 100% indicating that for most patients the intervention  
21  
22 was delivered as intended (Table 3).  
23  
24  
25  
26  
27  
28  
29  
30  
31  
32  
33  
34  
35  
36  
37  
38  
39  
40  
41  
42  
43  
44  
45  
46  
47  
48  
49  
50  
51  
52  
53  
54  
55  
56  
57  
58  
59  
60

**Table 1.** Nurse self-reported fidelity scores <sup>1</sup>

| Intervention component | Session1<br>(n=18)* | Session 2<br>(n=16)* | Session 3<br>(n=14)* | Session 4<br>(n=14)* |
|------------------------|---------------------|----------------------|----------------------|----------------------|
| Materials              | 100 (100, 100)      | -                    | -                    | -                    |
| Introduction           | 100 (100, 100)      | -                    | -                    | -                    |
| Assessment             | 100 (98.3, 100)     | 100 (100, 100)       | 100 (100, 100)       | 100 (100, 100)       |
| Education              | 100 (100, 100)      | 100 (100, 100)       | 100 (100, 100)       | 100 (100, 100)       |
| Exercise               | 100 (97.5, 100)     | 100 (100, 100)       | 100 (97.5, 100)      | 100 (75, 100)        |
| Weight loss            | 100 (88.9, 100)     | 100 (100, 100)       | 100 (66.7, 100)      | 100 (79.2, 100)      |
| Adjunct treatments     | 87.5 (33.3, 100)    | 87.5 (0, 100)        | 66.7 (45.8, 100)     | -                    |
| Review and planning    | 100 (100, 100)      | 100 (100, 100)       | 100 (100, 100)       | 100 (100, 100)       |

<sup>1</sup>Values are median% (IQR)

\*Number of sessions

**Table 2.** Fidelity scores using video-recordings of the sessions<sup>1</sup>

| Intervention        | Session 1         | Session 2       | Session 3*      | Session 4       |
|---------------------|-------------------|-----------------|-----------------|-----------------|
| Component           | (n=18)*           | (n=16)*         | (n=14)*         | (n=14)*         |
| Materials           | 100 (100, 100)    | -               | -               | -               |
| Introduction        | 100 (75, 100)     | -               | -               | -               |
| Assessment          | 91.4 (85, 93.3)   | 100 (100, 100)  | 100 (100, 100)  | 100 (100, 100)  |
| Education           | 78.1 (74.1, 93.8) | 87.5 (50, 100)  | 87.5 (50, 100)  | 100 (93.8, 100) |
| Exercise            | 94.4 (88.9, 100)  | 88.9 (75, 94.4) | 86.1 (72, 100)  | 75 (67.6, 82.8) |
| Weight loss         | 100 (87.5, 100)   | 90 (60, 100)    | 100 (68.9, 100) | 80 (49.2, 100)  |
| Adjunct treatments  | 50 (45.8, 100)    | 0 (0, 50)       | 50 (0, 100)     | -               |
| Review and planning | 75 (75, 100)      | 100 (100, 100)  | 100 (100, 100)  | 75 (37.5, 100)  |

<sup>1</sup>Values are median% (IQR),

\*Number of sessions

**Table 3.** Fidelity scores assessed using video-recordings across participants<sup>1</sup>

| Participant number | Overall sessions |
|--------------------|------------------|
| Participant 1      | 88.9 (75, 100)   |
| Participant 2      | 83.3 (41.7, 100) |
| Participant 3      | 100 (67.5, 100)  |
| Participant 4*     | 96.7 (88.9, 100) |
| Participant 5      | 75 (45, 100)     |
| Participant 6      | 100 (80, 100)    |
| Participant 7      | 100 (89.9, 100)  |
| Participant 8*     | 100 (95.8, 100)  |
| Participant 9      | 92.9 (50, 100)   |
| Participant 10     | 93.7 (77.5, 100) |
| Participant 11*    | 75 (50, 97.2)    |
| Participant 12     | 73.8 (18.8, 100) |
| Participant 13     | 100 (67, 100)    |
| Participant 14     | 100 (79, 100)    |
| Participant 15     | 85 (56, 100)     |
| Participant 16     | 100 (75, 100)    |
| Participant 17     | 100 (80, 100)    |
| Participant 18*    | 100 (81, 100)    |

<sup>1</sup>Values are median% (IQR)

\*Participants dropped out. The percentage fidelity score is calculated using scores from the sessions attended.

### Qualitative findings:

The duration of the initial and follow-up interview with the nurse was 94 minutes, and 34 minutes respectively. The nurse reported feeling nervous when delivering the intervention for the very first time, but felt more comfortable as the sessions progressed.

*“Very nervous... to start with... I don't think after a few sessions I was uncomfortable, I was probably more comfortable delivering the intervention...after few sessions, got better at getting feedback from patient as well so I think that boosted my confidence”.*

The nurse felt that patient assessment was easy to deliver considering their previous experience of assessing patients for other diseases.

*“I would say some of them were easy to find pinpoint the problems...as a nurse we always been asking these questions to patients... in this case but had previous experience in that area”*

The nurse felt that education was not always delivered as well in the first few sessions as in the follow-up sessions. They felt that there was a lot of information for the participants to take on board during that first initial assessment session and recommended that the advice could be spread over two or three sessions.

*“First few sessions I didn't think of as very good to tell them about the information and then later on, I built that ...”*

*“I think that session could be divided, erm, the very first one at least in two sessions... so first session, you just get to know the patient and they get their*

1  
2  
3 *feedback and, don't give them any, too much of a diet and weight loss*  
4  
5 *information"*  
6  
7

8 The nurse described how they initially lacked confidence in prescribing exercise, which  
9 was a new skill, to the patients.  
10

11  
12  
13 *"I had to decide after the assessment which exercise I'm going to assign them*  
14 *and I didn't feel comfortable... "I wasn't sure that whatever assessment I have*  
15 *done and the exercise I choose, that's going to make it any better ... I wasn't*  
16 *100% sure".*  
17  
18  
19  
20  
21  
22

23 On the other hand, it was easier to determine and link the exercises for patients who  
24 already had obvious problems in their knees.  
25

26  
27  
28 *"When there are obviously problems in the knee you can see, you can link what*  
29 *exercise... when you can't see the obvious problems, then it was difficult to*  
30 *determine what exercise you are going to assign"*  
31  
32  
33  
34  
35

36 They felt more confident and were able to adapt the exercises as they became more  
37 familiar with the exercises and having received feedback from the patients.  
38

39  
40  
41 *"I felt comfortable altering the exercise for them,... knowing that obviously, if it's*  
42 *painful for them then switching to a different exercise."*  
43  
44  
45  
46

47 The nurse delivered the weight loss advice with ease compared with the exercise and  
48 was able to explain to patients why it is good to lose weight where required.  
49

50  
51  
52 *"For the weight loss, you easily do that... I didn't feel too much*  
53 *uncomfortable...so positive from that is that I managed to tell everyone."*  
54  
55  
56  
57  
58  
59  
60

1  
2  
3 Even though they felt it was not difficult to deliver or incorporate the adjunctive  
4 treatments, they occasionally forgot to mention them or felt it was not necessary to  
5 repeat this in a subsequent session.  
6  
7  
8

9  
10 *“I do not think it was difficult to ask that or incorporate... it was probably as a*  
11 *human error or that you forgot to mention it...with some patients if you already*  
12 *mentioned once or twice, so with the first session, that if you need to you can*  
13 *use hot and cold therapy, and then they refuse it ... then there is no point*  
14 *[mentioning it again]”*  
15  
16  
17  
18  
19  
20  
21  
22

23 The nurse found it challenging to negotiate realistic goals with some patients,  
24 especially those who had high expectations but rated their confidence in achieve their  
25 goals as low.  
26  
27  
28

29  
30 *“The difficulty is that the goal setting they would expect high but then they when*  
31 *you ask them how likely you are going to achieve this goal their rating will be*  
32 *low... their rating will be like 4 or 5 and how you motivate them to go up to 8 or*  
33 *7, 8, 9, that one’s kind of difficult.”*  
34  
35  
36  
37  
38  
39

40 However, the nurse was able to reduce the expectation that was initially set for that  
41 particular goal for those patients.  
42  
43  
44

45 *“Obviously there was a previous goal...yes would reduce the expectation when*  
46 *they came back, I would be able to do this, so I am sure you would be able to*  
47 *see through the videotape”*  
48  
49  
50  
51  
52  
53  
54  
55  
56  
57  
58  
59  
60

1  
2  
3 **Integrating findings:** Convergence was found between the fidelity scores and nurse  
4 interview (Table 4). The excellent fidelity scores for the holistic assessment by the  
5 nurse was reflected in their confidence of assessing patients more generally. The  
6 moderate fidelity findings for education in the first session that increased in  
7 subsequent sessions was confirmed by the nurse and explained in terms of  
8 moderating the amount of information that was given to participants in the first session.  
9  
10 Weight loss advice was delivered with high fidelity and the nurse also felt confident in  
11 being able to deliver weight loss advice fully. A perceived lack of confidence in  
12 delivering the exercise component is consistent with lower fidelity scores for the  
13 exercise component. The adjunctive treatments were not always delivered as intended  
14 and that was consistent with the interview findings. Goal setting was challenging for  
15 the nurse which was reflected in the fidelity findings. Finally, convergence was found  
16 for review and planning as the nurse found it easy to summarise patient goals at the  
17 end of each session. There were no divergent findings.  
18  
19  
20  
21  
22  
23  
24  
25  
26  
27  
28  
29  
30  
31  
32  
33  
34  
35  
36  
37  
38  
39  
40  
41  
42  
43  
44  
45  
46  
47  
48  
49  
50  
51  
52  
53  
54  
55  
56  
57  
58  
59  
60



**Table 4.** Convergence between fidelity observed using video recordings and the results from the semi-structured nurse interview

| <b>Intervention components</b> | <b>Median (%) IQR fidelity *</b> | <b>Qualitative interview findings</b>                                                                                                                                                                                                                                                            | <b>Convergence</b> |
|--------------------------------|----------------------------------|--------------------------------------------------------------------------------------------------------------------------------------------------------------------------------------------------------------------------------------------------------------------------------------------------|--------------------|
| All components                 | 84.2                             | " I find myself that ... that I can deliver the care...I was probably more comfortable delivering the intervention...after few sessions"                                                                                                                                                         | Yes                |
| Materials                      | 100 (100, 100)                   | " I had to show them the booklet every patient so I don't think I have forgotten to do that"                                                                                                                                                                                                     | Yes                |
| Introduction                   | 100 (75, 100)                    | "I explain all the study and then explain that whole process again for the purpose of the session"                                                                                                                                                                                               | Yes                |
| Assessment                     | 100 (100, 100)                   | "I would say some of them were easy to find pinpoint the problems...as a nurse we always been asking these questions to patients... in this case but had previous experience in that area"                                                                                                       | Yes                |
| Exercise                       | 88.9 (72.7, 94.4)                | "We practiced and demonstrated exercises... I felt comfortable altering the exercise for them...I just couldn't think how to link that, erm, goal setting I didn't deliver it good... I don't think I could have delivered it any better than that either... some did actually achieve the goal" | Yes                |
| Education                      | 87.5 (74.1, 100)                 | "first few sessions I didn't think of as very good to tell them about the information and then later on, I built that"                                                                                                                                                                           | Yes                |

|                     |                 |                                                                                                                                                                                                                                                                |     |
|---------------------|-----------------|----------------------------------------------------------------------------------------------------------------------------------------------------------------------------------------------------------------------------------------------------------------|-----|
| Weight loss         | 100 (77.8, 100) | "Positive from that is that I managed to tell everyone that, "you need to lose weight", so I think it was kind of structured in a way... I didn't feel too much uncomfortable"                                                                                 | Yes |
| Adjunct treatments  | 50 (0, 50)      | "it was probably as a human error or that you forgot to mention it...with some patients if you already mentioned once or twice so with the first session that you need to you can use hot and cold therapy and then they refuse it and then there is no point" | Yes |
| Review and planning | 100 (25, 100)   | "Not difficult... we always talked about it this is what we discussed it today this is the exercise we, have assigned you and if you feel that you can progress into further do so"                                                                            | Yes |

\*Median fidelity scores of the individual components across the four sessions

1  
2  
3  
4  
5  
6  
7  
8  
9  
10  
11  
12  
13  
14  
15  
16  
17  
18  
19  
20  
21  
22  
23  
24  
25  
26  
27  
28  
29  
30  
31  
32  
33  
34  
35  
36  
37  
38  
39  
40  
41  
42  
43  
44  
45  
46

## DISCUSSION

This study evaluated fidelity of delivery of a nurse-led non-pharmacological package of care for knee pain due to OA and validated the findings in an interview with the nurse that delivered it. The majority of the non-pharmacological components of the intervention were delivered with good fidelity. Excellent fidelity was found for patient assessment, education, demonstration and advice on exercise and weight loss advice. Tasks that demonstrated lower fidelity within the exercise component included goal setting and review. These were also perceived as difficult by the nurse. Advice around the use of adjunctive treatments such as the use of hot or cold treatments, walking aids and footwear, were also not always delivered as planned. Agreement between the nurse and independent rater was below the cut-off point of 80% for education, exercise, weight loss, adjunctive treatment, and review and planning, which is reported as the minimum acceptable agreement between raters.<sup>37</sup> Fidelity scores across different participants were high overall with the lowest score being 74%.

To the authors' knowledge, this is the first study that has assessed fidelity of a nurse-led non-pharmacological intervention for knee pain due to OA and integrated the findings. Our study is based on a fidelity checklist that has been previously validated in complex interventions delivered in a research setting.<sup>21</sup> We tailored the checklist according to the intervention and further refined it. Moreover, the reliability of the fidelity checklist was established when two independent viewers scored the video recordings of the sessions.

From the interview transcripts, factors that influenced fidelity of delivery are identified. The nurse was less confident to identify appropriate patient goals and prescribe exercise in the first few sessions, but this improved thereafter. This is not a barrier per

1  
2  
3 se, but suggests that some further training and additional support for nurses in this  
4  
5 new role would be needed to ensure fidelity at the start of the study. The nurse was  
6  
7 able to draw on her previous experience working with other patient groups to discuss  
8  
9 and assess complex issues. Nurse's previous experience assessing patients,  
10  
11 therefore, facilitated fidelity of delivery. Although the fidelity for education appeared to  
12  
13 be lower in the first session this was because the nurse recognised and responded  
14  
15 that participants were being given a lot of information. These findings are not surprising  
16  
17 as we aimed to train a nurse with no prior experience of managing musculoskeletal  
18  
19 diseases to deliver a complex non-pharmacological package of care for knee pain.  
20  
21 Where the nurse identified difficulties in delivering the intervention as intended, she  
22  
23 was able to seek additional advice and training from MH. This experience has allowed  
24  
25 us to further improve the nurse training programme for use in the feasibility RCT.  
26  
27  
28  
29

30  
31 Previous studies using mixed methods have explored factors that influenced fidelity  
32  
33 and found good fidelity of delivery of a physiotherapist-led complex package of care  
34  
35 for chronic low-back pain and OA.<sup>21 22</sup> They report on the factors that influenced fidelity  
36  
37 on three levels: provider, participant and programme. Williams *et al*<sup>38</sup> demonstrated  
38  
39 good fidelity of delivery of a walking intervention when delivered by nurses and  
40  
41 healthcare assistants in primary care. Even though they used a mixed methods  
42  
43 approach to assess fidelity, they did not integrate the findings. In our study, the  
44  
45 research nurse rated themselves higher than the independent rating using the video  
46  
47 recordings consistent with previous studies.<sup>32 39</sup> Similar findings on barriers and  
48  
49 facilitators to deliver the intervention have been identified in a complex intervention for  
50  
51 people with dementia and chronic low back pain.<sup>22 32</sup> In fact, Walton *et al*<sup>32</sup> extended  
52  
53 over the factors that influenced fidelity of delivery reported by Toomey *et al*<sup>22</sup> and  
54  
55 recognised that knowledge, providers' attributes, ease of adaptation of the intervention  
56  
57  
58  
59  
60

1  
2  
3 in relation to participants' needs influenced fidelity. Based on the findings, it was  
4  
5 challenging to address adaptation and determine the appropriate balance between  
6  
7 fidelity and adaptation in this study. This may indicate some key overlapping themes  
8  
9 that may limit fidelity of delivery despite the different types of intervention and  
10  
11 conditions.  
12  
13

14  
15 There are a number of limitations to this study. A key caveat is that only one nurse  
16  
17 was involved in delivery of the intervention. In a larger trial, there would be more nurses  
18  
19 to deliver the intervention across multiple sites, which increases the likelihood of  
20  
21 variation in fidelity. This study lasted 17 weeks and this is a short period of time over  
22  
23 which fidelity may not fluctuate much. However, this can be an issue with longer  
24  
25 studies.<sup>40</sup> The nurse who delivered the intervention was interviewed but in the  
26  
27 absence of data from additional participants, emerging categories could not be revised  
28  
29 and refined into fully realised themes, however, an inductive approach to analysis was  
30  
31 taken to reflect the views of the intervention provider. A second interview with the nurse  
32  
33 was conducted to capture any salient points not discussed during the first interview.  
34  
35 We did not consider to capture engagement of the participants in the study. Complex  
36  
37 interventions are often a dynamic interplay between patient and healthcare  
38  
39 professionals. Whilst checklists can be helpful in determining whether an intervention  
40  
41 has been delivered they do not allow for or capture the flexibility that is required when  
42  
43 tailoring an intervention to the individual.  
44  
45  
46  
47  
48  
49

50  
51 The intervention was delivered by a research nurse with no background knowledge of  
52  
53 musculoskeletal diseases and no previous experience delivering treatment for  
54  
55 arthritis. This is a particular strength as we were able to assess the effectiveness of  
56  
57 our nurse training programme and its shortcomings. Additionally, we video-recorded  
58  
59 and evaluated all the consultations that were delivered. One of the key strengths of  
60

1  
2  
3 our study was that we identified the specific components of the intervention not  
4 delivered as intended. Moreover, we triangulated the findings and found convergence  
5 providing internal validity. The nurse was interviewed to address some of the NIHBC  
6 components (study design, provider training) that have not been examined previously.  
7  
8  
9  
10  
11

12 22

13  
14  
15 In conclusion, we found that nurse-led delivery of a complex package of care is  
16 feasible within a research setting. The research nurse delivered care for patients with  
17 knee pain due to OA with high fidelity for most of the components of the intervention  
18 except for advice about the use of hot/cold treatments, walking aids, footwear and goal  
19 setting. We believe that upskilling nurses to deliver complex non-pharmacological  
20 components for the management of knee pain due to OA is feasible. Nurses would  
21 have more time to spend with patients and educate them about the condition. The  
22 training package for delivery of the intervention will need to ensure that the nurses are  
23 confident in delivering the behavioural change strategies such as goal setting. Follow-  
24 up training sessions and support during the start of the feasibility when nurses are first  
25 delivering the intervention may be helpful in order to improve confidence and delivery.  
26  
27 Future work will need to consider fidelity where there will be more than one nurse  
28 delivering the intervention in a clinical setting where other factors will also influence  
29 fidelity. Our results, nevertheless, show that it is feasible to apply the non-  
30 pharmacological package of care in a future feasibility RCT.  
31  
32  
33  
34  
35  
36  
37  
38  
39  
40  
41  
42  
43  
44  
45  
46  
47  
48  
49

## 50 LEGENDS

51  
52  
53 **Figure 1.** Agreement between nurse-rated and video-rated methods for the  
54 components of the intervention Values shown are % agreement and error bars  
55 indicate the 95% CI  
56  
57  
58  
59  
60

## REFERENCES

1. Jinks C, Jordan K, Ong B, et al. A brief screening tool for knee pain in primary care (KNEST). 2. Results from a survey in the general population aged 50 and over. *Rheumatology* 2004;43(1):55-61.
2. NICE. National Institute for Health and Care Excellence. Osteoarthritis: care and management, 2014.
3. Egerton T, Nelligan RK, Setchell J, et al. General practitioners' views on managing knee osteoarthritis: a thematic analysis of factors influencing clinical practice guideline implementation in primary care. *BMC rheumatology* 2018;2(1):30.
4. Porcheret M, Jordan K, Jinks C, et al. Primary care treatment of knee pain—a survey in older adults. *Rheumatology* 2007;46(11):1694-700.
5. Doherty M, Jenkins W, Richardson H, et al. Efficacy and cost-effectiveness of nurse-led care involving education and engagement of patients and a treat-to-target urate-lowering strategy versus usual care for gout: a randomised controlled trial. *The Lancet* 2018;392(10156):1403-12.
6. Saffi MAL, Polanczyk CA, Rabelo-Silva ER. Lifestyle interventions reduce cardiovascular risk in patients with coronary artery disease: A randomized clinical trial. *European Journal of Cardiovascular Nursing* 2014;13(5):436-43. doi: 10.1177/1474515113505396
7. Strömberg A, Mårtensson J, Fridlund B, et al. Nurse-led heart failure clinics improve survival and self-care behaviour in patients with heart failure: results from a prospective, randomised trial. *European heart journal* 2003;24(11):1014-23.
8. Welch G, Garb J, Zagarins S, et al. Nurse diabetes case management interventions and blood glucose control: Results of a meta-analysis. *Diabetes Research and Clinical Practice* 2010;88(1):1-6.
9. Allen JD, Linnan LA, Emmons KM, et al. Fidelity and its relationship to implementation effectiveness, adaptation, and dissemination. *Dissemination and implementation research in health: Translating science to practice* 2012:281-304.
10. Carroll C, Patterson M, Wood S, et al. A conceptual framework for implementation fidelity. *Implementation Science* 2007;2(1):40. doi: 10.1186/1748-5908-2-40
11. Moncher FJ, Prinz RJ. Treatment fidelity in outcome studies. *Clinical psychology review* 1991;11(3):247-66.
12. Colditz GA, Emmons KM. The promise and challenges of dissemination and implementation research. *Dissemination and implementation research in health: Translating science to practice* 2012:3-22.
13. Borrelli B. The assessment, monitoring, and enhancement of treatment fidelity in public health clinical trials. *Journal of public health dentistry* 2011;71:S52-S63.
14. Walker MF, Hoffmann TC, Brady MC, et al. Improving the development, monitoring and reporting of stroke rehabilitation research: Consensus-based core recommendations from the Stroke Recovery and Rehabilitation Roundtable. *International Journal of Stroke* 2017;12(5):472-79.
15. Bellg AJ, Borrelli B, Resnick B, et al. Enhancing treatment fidelity in health behavior change studies: best practices and recommendations from the NIH Behavior Change Consortium. *Health Psychology* 2004;23(5):443.
16. French SD, Green SE, Francis JJ, et al. Evaluation of the fidelity of an interactive face-to-face educational intervention to improve general practitioner management of back pain. *BMJ open* 2015;5(7):e007886.
17. Jobe JB. Cognitive psychology and self-reports: models and methods. *Quality of Life Research* 2003;12(3):219-27.
18. Schulte AC, Easton JE, Parker J. Advances in treatment integrity research: Multidisciplinary perspectives on the conceptualization, measurement, and enhancement of treatment integrity. *School Psychology Review* 2009;38(4)
19. Huijg JM, Dusseldorp E, Gebhardt WA, et al. Factors associated with physical therapists' implementation of physical activity interventions in the Netherlands. *Physical therapy* 2015;95(4):539-57.

20. McKenna JW, Flower A, Ciullo S. Measuring fidelity to improve intervention effectiveness. *Intervention in School and Clinic* 2014;50(1):15-21.
21. Toomey E, Matthews J, Guerin S, et al. Development of a feasible implementation Fidelity protocol within a complex physical therapy-led self-management intervention. *Physical therapy* 2016;96(8):1287-98.
22. Toomey E, Matthews J, Hurley DA. Using mixed methods to assess fidelity of delivery and its influencing factors in a complex self-management intervention for people with osteoarthritis and low back pain. *BMJ open* 2017;7(8):e015452.
23. Craig P, Dieppe P, Macintyre S, et al. Developing and evaluating complex interventions: the new Medical Research Council guidance. *Bmj* 2008;337:a1655.
24. Farmer T, Robinson K, Elliott SJ, et al. Developing and implementing a triangulation protocol for qualitative health research. *Qualitative health research* 2006;16(3):377-94.
25. Moore GF, Audrey S, Barker M, et al. Process evaluation of complex interventions: Medical Research Council guidance. *BMJ : British Medical Journal* 2015;350:h1258. doi: 10.1136/bmj.h1258
26. Hall M, Fuller A, Nomikos PA, et al. East Midlands knee pain multiple randomised controlled trial cohort study: cohort establishment and feasibility study protocol. *BMJ Open* 2020;10(9):e037760. doi: 10.1136/bmjopen-2020-037760
27. FLICK U. AN INTRODUCTION TO QUALITATIVE RESEARCH. 5 ed. London SAGE Publications Ltd 2014.
28. Millar B, McWilliams DF, Abhishek A, et al. Investigating musculoskeletal health and wellbeing; a cohort study protocol. *BMC musculoskeletal disorders* 2020;21(1):1-10.
29. Bellamy N. WOMAC Osteoarthritis Index User Guide, vol. 5. *Brisbane, Australia* 2002
30. Hoffmann TC, Glasziou PP, Boutron I, et al. Better reporting of interventions: template for intervention description and replication (TIDieR) checklist and guide. *Bmj* 2014;348
31. Michie S, Rumsey N, Fussell A, et al. Improving health: changing behaviour. NHS health trainer handbook. 2008
32. Walton H, Spector A, Roberts A, et al. Developing strategies to improve fidelity of delivery of, and engagement with, a complex intervention to improve independence in dementia: a mixed methods study. *BMC Medical Research Methodology* 2020;20(1):1-19.
33. Ang K, Hepgul N, Gao W, et al. Strategies used in improving and assessing the level of reporting of implementation fidelity in randomised controlled trials of palliative care complex interventions: A systematic review. *Palliative medicine* 2018;32(2):500-16.
34. Borrelli B, Sepinwall D, Ernst D, et al. A new tool to assess treatment fidelity and evaluation of treatment fidelity across 10 years of health behavior research. *Journal of consulting and clinical psychology* 2005;73(5):852.
35. Thomas DR. A General Inductive Approach for Analyzing Qualitative Evaluation Data. *American Journal of Evaluation* 2006;27(2):237-46. doi: 10.1177/1098214005283748
36. Ogrinc G, Davies L, Goodman D, et al. SQUIRE 2.0 (Standards for Quality Improvement Reporting Excellence): revised publication guidelines from a detailed consensus process. *BMJ quality & safety* 2016;25(12):986-92. doi: 10.1136/bmjqs-2015-004411 [published Online First: 2015/09/16]
37. McHugh ML. Interrater reliability: the kappa statistic. *Biochem Med (Zagreb)* 2012;22(3):276-82.
38. Williams SL, McSharry J, Taylor C, et al. Translating a walking intervention for health professional delivery within primary care: A mixed-methods treatment fidelity assessment. *British Journal of Health Psychology* 2020;25(1):17-38. doi: <https://doi.org/10.1111/bjhp.12392>
39. Hardeman W, Michie S, Fanshawe T, et al. Fidelity of delivery of a physical activity intervention: predictors and consequences. *Psychology and Health* 2008;23(1):11-24.



- 1  
2  
3 40. Radford K, Sutton CJ, Sach T, et al. Early, specialist vocational rehabilitation to  
4 facilitate return to work after traumatic brain injury: the FRESH feasibility RCT.  
5 *Health technology assessment* 2018;22(33):1-156.  
6  
7  
8  
9  
10  
11  
12  
13  
14  
15  
16  
17  
18  
19  
20  
21  
22  
23  
24  
25  
26  
27  
28  
29  
30  
31  
32  
33  
34  
35  
36  
37  
38  
39  
40  
41  
42  
43  
44  
45  
46  
47  
48  
49  
50  
51  
52  
53  
54  
55  
56  
57  
58  
59  
60

For peer review only

## **FUNDING STATEMENT**

This research was supported and co-funded by the NIHR Nottingham Biomedical Research Centre and the Pain Centre Versus Arthritis. The views expressed are those of author(s) and not necessarily those of the NHS, the NIHR or the Department of Health and Social Care. The study is sponsored by the University of Nottingham, UK.

## **COMPETING INTEREST STATEMENTS**

All authors declare no competing interests.

## **ETHICS APPROVAL**

The study received ethical approval by the East Midlands-Derby Research Ethics Committee (REC) (18/EM/0288).

## **CONTRIBUTORS**

PAN, MH, AF, BM, RO, AMV, RdN, MD, DAW, and AA contributed to the design and conception of the study. PAN conducted the quantitative and qualitative data collection and analysis. MH was the independent rater for video assessment of fidelity. AF and RdN provided guidance in the qualitative data collection and analysis. RO, AA and MH provided guidance in the quantitative analysis. BM contributed to the study set up and recruitment. PAN wrote the first draft. PAN, MH, AF, BM, RO, AMV, RdN, MD, DAW, and AA have read, provided critical feedback and approved the final manuscript. PAN has access to qualitative and quantitative data and vouches to the accuracy of data analysis.

## **PATIENT CONSENT**

Obtained

## **DATA STATEMENT SECTION**

TIDieR checklist, and interview topic guides have been included as supplementary files. Quantitative fidelity checklists are included as supplementary files in the published protocol. Please email the corresponding author at [Polykarpos.nomikos@nottingham.ac.uk](mailto:Polykarpos.nomikos@nottingham.ac.uk) whether further information is required.

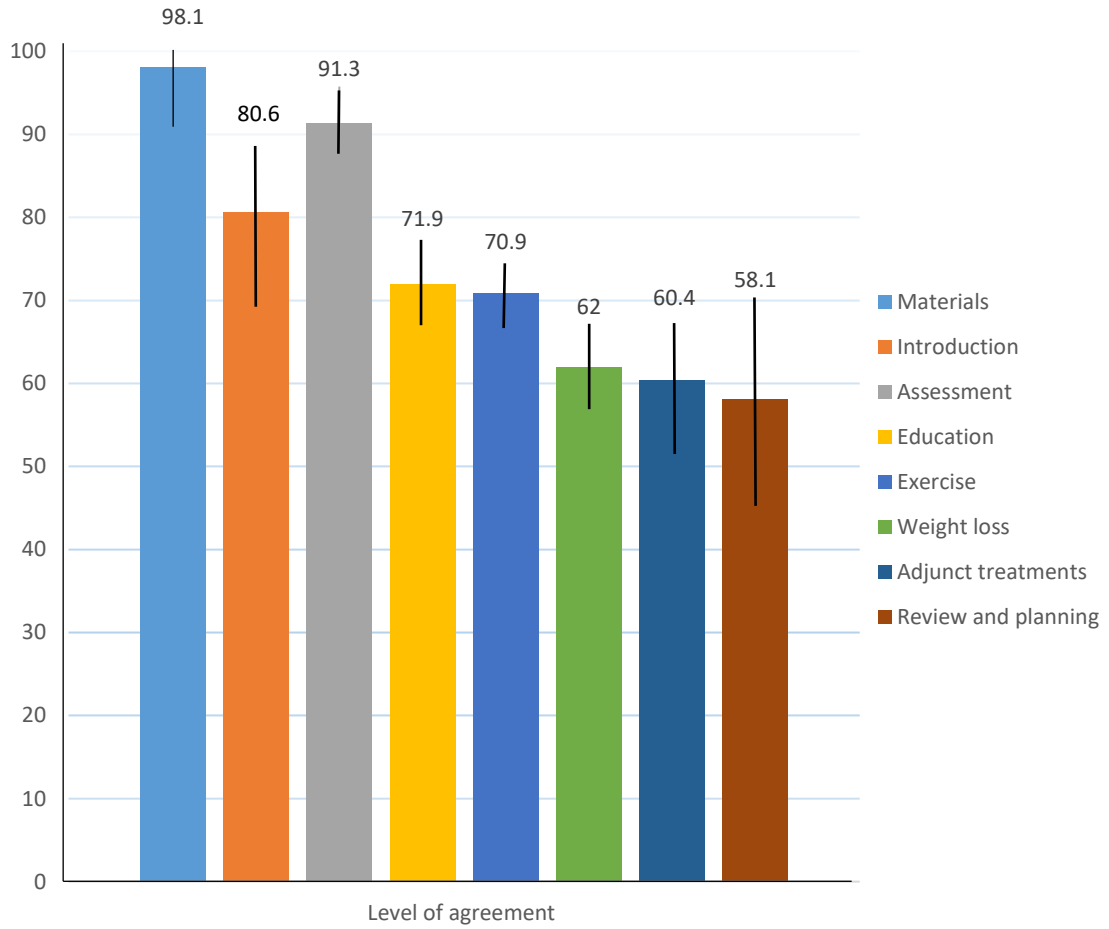

1  
2  
3  
4  
5  
6  
7  
8  
9  
10  
11  
12  
13  
14  
15  
16  
17  
18  
19  
20  
21  
22  
23  
24  
25  
26  
27  
28  
29  
30  
31  
32  
33  
34  
35  
36  
37  
38  
39  
40  
41  
42  
43  
44  
45  
46

Additional file 1. Items of the non-pharmacological intervention (TIDieR checklist)

|                              |                                                                                                                                                                                                                                                                                                                                                                                                                                                                                                                                                                                                                                                                                                                                                                                                                                                                                                                                                                                                                                                                                           |
|------------------------------|-------------------------------------------------------------------------------------------------------------------------------------------------------------------------------------------------------------------------------------------------------------------------------------------------------------------------------------------------------------------------------------------------------------------------------------------------------------------------------------------------------------------------------------------------------------------------------------------------------------------------------------------------------------------------------------------------------------------------------------------------------------------------------------------------------------------------------------------------------------------------------------------------------------------------------------------------------------------------------------------------------------------------------------------------------------------------------------------|
| <b>1. Brief name</b>         | Non-pharmacological complex intervention comprised of education, exercise, and weight loss advice if required.                                                                                                                                                                                                                                                                                                                                                                                                                                                                                                                                                                                                                                                                                                                                                                                                                                                                                                                                                                            |
| <b>2. Aims and Rationale</b> | Development and evaluation of the non-pharmacological treatment component.                                                                                                                                                                                                                                                                                                                                                                                                                                                                                                                                                                                                                                                                                                                                                                                                                                                                                                                                                                                                                |
| <b>3. What was done?</b>     | <p><b>Training package of the provider:</b> The content of the package was based on NICE guidelines for the management of OA and a report by Arthritis Research UK on the educational needs of health professionals working with people with OA. The content consisted of a standardised treatment manual. Academic and clinical experts and members of a patient advisory group have provided input into the training package. Their key components were:</p> <ul style="list-style-type: none"> <li>• The epidemiology and nature of knee pain and knee OA</li> <li>• Assessment of the patient with knee OA</li> <li>• Core NICE guidelines for managing OA</li> <li>• Principles of strengthening and aerobic exercise prescription for knee OA</li> <li>• Information and advice to support weight loss</li> <li>• Strategies to support behaviour change</li> <li>• Pharmacological management of OA and knee pain following a step-wise protocol of optimising analgesia</li> </ul> <p><b>Mode of delivery:</b> Four face-to-face individual sessions over a five-week period.</p> |

## Additional file 1. Items of the non-pharmacological intervention (TIDieR checklist)

|                                                                            |                                                                                                                                                                                                                                                                                                                                                                                                             |
|----------------------------------------------------------------------------|-------------------------------------------------------------------------------------------------------------------------------------------------------------------------------------------------------------------------------------------------------------------------------------------------------------------------------------------------------------------------------------------------------------|
| <b>4. Who delivered the intervention ?</b>                                 | A trained nurse with no prior knowledge of treating musculoskeletal conditions delivered the non-pharmacological intervention to knee pain people. A rheumatologist and research physiotherapist delivered in total eight sessions of the module over a three-month period.                                                                                                                                 |
| <b>5. Where was the intervention provided?</b>                             | Single centre research setting, clinic room, city hospital, Nottingham                                                                                                                                                                                                                                                                                                                                      |
| <b>6. When and how often or how much of the intervention was provided?</b> | The complex intervention was delivered for up to 1.5 hours in session one and 46 minutes in the follow up sessions. The nurse was endeavoured to provide as much intervention as an individual could tolerate. The amount of the intervention was video recorded.                                                                                                                                           |
| <b>7. Was the intervention tailored?</b>                                   | Tailoring was built in the intervention. Functional goals were agreed between the nurse and people with knee pain to facilitate exercise prescription. Weight loss goals were agreed with participants who were overweight. The description of the treatment manual highlights procedures for tailoring practice activities. No modifications of the intervention were made during the course of the study. |
| <b>8. How well was the intervention delivered?</b>                         | A single research nurse who received training, delivered the intervention and fidelity was assessed by video recording all sessions. After preliminary fidelity analysis, the nurse received additional supervised training to deliver the intervention.                                                                                                                                                    |

1  
2 Additional file 2. The semi-structured interview guide for the nurse  
3

## 4 **Nurse's views on experience of delivering the non-pharmacological** 5 6 **intervention** 7

8  
9 We're going to start by discussing your overall views on the knee pain treatment programme, the training  
10  
11 you received to deliver it, and then talk about the different components of the intervention separately.  
12

- 13  
14  
15 1. Can you tell me what your overall impression of the knee pain treatment programme is, having  
16 delivered it for the first time?  
17

## 18 **Nurse's view of the training received to deliver the non-pharmacological intervention** 19

20  
21 We are now going to discuss the training you received to deliver this treatment.  
22

- 23  
24 2. Can you tell me how you found the training you received  
25 ○ Length of training/ number of sessions/ delivery over weeks rather than 2 days condensed  
26 ○ Material covered in sessions: too much/too little/about right  
27 ○ Opportunities to practice/ feedback  
28 ○ Resources/ manual/ electronic material (links to videos)/ links to weight loss resources /  
29 exercise sheets/ case-studies  
30  
31  
32 3. How did you find following the manual provided?  
33 ○ Probe – reasons for it being easy / difficult to follow.  
34 ○ What suggestions do you have to modify the manual to make it easier to use in the future?  
35 ○ Any suggestions for improving the training  
36  
37  
38 • How confident did you feel about delivering the treatment once you had completed your training?  
39

## 40 **Nurse's views on experience of delivering the non-pharmacological intervention** 41

42  
43 We are now going to discuss how you found delivering the treatment to patients.  
44

- 45  
46 4. How did you find delivering this treatment to patients?  
47  
48  
49  
50 • As you know, the treatment package had different components – education on self-managing knee  
51 pain, giving the participant exercises, advising them on weight loss, setting individual goals with the  
52 participants and assessing patient confidence to achieve goals.  
53 How did you find delivering these components?  
54  
55 ○ [cover ONE at a time]  
56 ○ Education  
57 ○ Exercise  
58 ○ Weight loss  
59 ○ Goal setting  
60

1  
2 Additional file 2. The semi-structured interview guide for the nurse  
3

- 4       ○ Assessing patient confidence to achieve goals  
5       ○ Using the diaries (exercise and weight loss)  
6  
7

8 5. How did you find setting goals with patients?  
9

- 10       ○ Probe - did they actively participate in the discussions?  
11

12 6. How did you find the follow-up sessions with participants and providing feedback on participants'  
13 progress with their exercises and/or weight loss?  
14

- 15       ○ Prompts - patient receipt of advice / feedback (any challenges with patients accepting advice  
16 or adhering to the treatment given)  
17  
18

19 • Were there any components that you found challenging to implement?  
20  
21

- 22       ○ What made it challenging to deliver this component? [cover ONE at a time]  
23       ○ Were there any other components that you found challenging to implement? Why.  
24       ○ What would help support you in delivering this in the future?  
25  
26  
27  
28

29 • Were any aspects of the intervention not delivered as planned?  
30  
31

- 32       ○ What were the barriers to delivering [the aspect]? [cover ONE at a time]  
33       ○ What would help support you in delivering this in the future?  
34  
35  
36  
37

38 We are now going to talk about tailoring the treatment to each patient.  
39

40 7. How did you find the final session with the participants? Did you feel that they would be able to  
41 continue with the advice/exercises/weight loss etc independently?  
42  
43  
44

45 We'd now like to discuss the resources provided to support you delivery the treatment programme.  
46  
47

48 8. How useful did you find the other resources during the treatment programme?  
49

- 50       ○ Probe - handouts / training manuals / thera-bands / exercise sheets/ exercise diaries/ NHS  
51 weight loss resource (BMI and weigh loss calculator)/ food diaries/ other weight-loss hand  
52 outs  
53  
54       ○ What suggestions do you have to improve these resources in the future?  
55  
56  
57  
58  
59  
60

1  
2 Additional file 2. The semi-structured interview guide for the nurse  
3

4 9. Is there any additional support you need in being able to deliver this treatment?  
5  
6  
7

8 **We have come to the end of the interview. Do you have any further comments about the training**  
9 **and/or treatment package that have not been covered?**  
10  
11  
12  
13  
14  
15  
16  
17  
18  
19  
20  
21  
22  
23  
24  
25  
26  
27  
28  
29  
30  
31  
32  
33  
34  
35  
36  
37  
38  
39  
40  
41  
42  
43  
44  
45  
46  
47  
48  
49  
50  
51  
52  
53  
54  
55  
56  
57  
58  
59  
60

For peer review only



# Reporting checklist for quality improvement study.

Based on the SQUIRE guidelines.

## Instructions to authors

Complete this checklist by entering the page numbers from your manuscript where readers will find each of the items listed below.

Your article may not currently address all the items on the checklist. Please modify your text to include the missing information. If you are certain that an item does not apply, please write "n/a" and provide a short explanation.

Upload your completed checklist as an extra file when you submit to a journal.

In your methods section, say that you used the SQUIRE reporting guidelines, and cite them as:

Ogrinc G, Davies L, Goodman D, Batalden P, Davidoff F, Stevens D. SQUIRE 2.0 (Standards for Quality Improvement Reporting Excellence): revised publication guidelines from a detailed consensus process

|              | Reporting Item                                                                                                                                                                                                                                   | Page Number |
|--------------|--------------------------------------------------------------------------------------------------------------------------------------------------------------------------------------------------------------------------------------------------|-------------|
| <b>Title</b> | <p><a href="#">#1</a> Indicate that the manuscript concerns an initiative to improve healthcare (broadly defined to include the quality, safety, effectiveness, patientcenteredness, timeliness, cost, efficiency, and equity of healthcare)</p> | 1           |

## Abstract

- [#02a](#) Provide adequate information to aid in searching and indexing 3
- [#02b](#) Summarize all key information from various sections of the text using the abstract format of the intended publication or a structured summary such as: background, local problem, methods, interventions, results, conclusions 2,3

## Introduction

- Problem description** [#3](#) Nature and significance of the local problem 4
- Available knowledge** [#4](#) Summary of what is currently known about the problem, including relevant previous studies 4,5
- Rationale** [#5](#) Informal or formal frameworks, models, concepts, and / or theories used to explain the problem, any reasons or assumptions that were used to develop the intervention(s), and reasons why the intervention(s) was expected to work 7, 9

- Specific aims** [#6](#) Purpose of the project and of this report 6

## Methods

|    |                 |                      |                                                  |         |
|----|-----------------|----------------------|--------------------------------------------------|---------|
| 1  | Context         | <a href="#">#7</a>   | Contextual elements considered important at      | 7       |
| 2  |                 |                      | the outset of introducing the intervention(s)    |         |
| 3  |                 |                      |                                                  |         |
| 4  |                 |                      |                                                  |         |
| 5  |                 |                      |                                                  |         |
| 6  | Intervention(s) | <a href="#">#08a</a> | Description of the intervention(s) in sufficient | 8,9     |
| 7  |                 |                      | detail that others could reproduce it            |         |
| 8  |                 |                      |                                                  |         |
| 9  |                 |                      |                                                  |         |
| 10 |                 |                      |                                                  |         |
| 11 | Intervention(s) | <a href="#">#08b</a> | Specifics of the team involved in the work       | 11      |
| 12 |                 |                      |                                                  |         |
| 13 |                 |                      |                                                  |         |
| 14 |                 |                      |                                                  |         |
| 15 | Study of the    | <a href="#">#09a</a> | Approach chosen for assessing the impact of      | 9,10,11 |
| 16 |                 |                      | the intervention(s)                              |         |
| 17 | Intervention(s) |                      |                                                  |         |
| 18 |                 |                      |                                                  |         |
| 19 |                 |                      |                                                  |         |
| 20 | Study of the    | <a href="#">#09b</a> | Approach used to establish whether the           | 12      |
| 21 |                 |                      | observed outcomes were due to the                |         |
| 22 | Intervention(s) |                      | intervention(s)                                  |         |
| 23 |                 |                      |                                                  |         |
| 24 |                 |                      |                                                  |         |
| 25 |                 |                      |                                                  |         |
| 26 |                 |                      |                                                  |         |
| 27 |                 |                      |                                                  |         |
| 28 | Measures        | <a href="#">#10a</a> | Measures chosen for studying processes           | 4,5,7   |
| 29 |                 |                      | and outcomes of the intervention(s),             |         |
| 30 |                 |                      | including rationale for choosing them, their     |         |
| 31 |                 |                      | operational definitions, and their validity and  |         |
| 32 |                 |                      | reliability                                      |         |
| 33 |                 |                      |                                                  |         |
| 34 |                 |                      |                                                  |         |
| 35 |                 |                      |                                                  |         |
| 36 |                 |                      |                                                  |         |
| 37 |                 |                      |                                                  |         |
| 38 |                 |                      |                                                  |         |
| 39 |                 |                      |                                                  |         |
| 40 | Measures        | <a href="#">#10b</a> | Description of the approach to the ongoing       | 11,12   |
| 41 |                 |                      | assessment of contextual elements that           |         |
| 42 |                 |                      | contributed to the success, failure, efficiency, |         |
| 43 |                 |                      | and cost                                         |         |
| 44 |                 |                      |                                                  |         |
| 45 |                 |                      |                                                  |         |
| 46 |                 |                      |                                                  |         |
| 47 |                 |                      |                                                  |         |
| 48 |                 |                      |                                                  |         |
| 49 |                 |                      |                                                  |         |
| 50 | Measures        | <a href="#">#10c</a> | Methods employed for assessing                   | 11,12   |
| 51 |                 |                      | completeness and accuracy of data                |         |
| 52 |                 |                      |                                                  |         |
| 53 |                 |                      |                                                  |         |
| 54 |                 |                      |                                                  |         |
| 55 | Analysis        | <a href="#">#11a</a> | Qualitative and quantitative methods used to     | 8,9,10  |
| 56 |                 |                      | draw inferences from the data                    |         |
| 57 |                 |                      |                                                  |         |
| 58 |                 |                      |                                                  |         |
| 59 |                 |                      |                                                  |         |
| 60 |                 |                      |                                                  |         |

|    |                        |                                              |                                                |           |
|----|------------------------|----------------------------------------------|------------------------------------------------|-----------|
| 1  | Analysis               | <a href="#">#11b</a>                         | Methods for understanding variation within     | 12, 21-23 |
| 2  |                        |                                              |                                                |           |
| 3  |                        |                                              |                                                |           |
| 4  |                        |                                              | the data, including the effects of time as a   |           |
| 5  |                        |                                              |                                                |           |
| 6  |                        |                                              | variable                                       |           |
| 7  |                        |                                              |                                                |           |
| 8  | Ethical considerations | <a href="#">#12</a>                          | Ethical aspects of implementing and studying   | 9, 31     |
| 9  |                        |                                              |                                                |           |
| 10 |                        |                                              |                                                |           |
| 11 |                        |                                              | the intervention(s) and how they were          |           |
| 12 |                        |                                              |                                                |           |
| 13 |                        |                                              | addressed, including, but not limited to,      |           |
| 14 |                        |                                              |                                                |           |
| 15 |                        |                                              | formal ethics review and potential conflict(s) |           |
| 16 |                        |                                              |                                                |           |
| 17 |                        |                                              | of interest                                    |           |
| 18 |                        |                                              |                                                |           |
| 19 | Results                | <a href="#">#13a</a>                         | Initial steps of the intervention(s) and their | 7,8,11    |
| 20 |                        |                                              |                                                |           |
| 21 |                        |                                              |                                                |           |
| 22 |                        |                                              | evolution over time (e.g., time-line diagram,  |           |
| 23 |                        |                                              |                                                |           |
| 24 |                        |                                              | flow chart, or table), including modifications |           |
| 25 |                        |                                              |                                                |           |
| 26 |                        |                                              | made to the intervention during the project    |           |
| 27 |                        |                                              |                                                |           |
| 28 |                        |                                              |                                                |           |
| 29 |                        |                                              |                                                |           |
| 30 |                        |                                              |                                                |           |
| 31 |                        |                                              |                                                |           |
| 32 |                        |                                              |                                                |           |
| 33 |                        |                                              |                                                |           |
| 34 |                        |                                              |                                                |           |
| 35 | <a href="#">#13b</a>   | Details of the process measures and          | 9-12                                           |           |
| 36 |                        | outcome                                      |                                                |           |
| 37 |                        |                                              |                                                |           |
| 38 |                        |                                              |                                                |           |
| 39 |                        |                                              |                                                |           |
| 40 | <a href="#">#13c</a>   | Contextual elements that interacted with the | n/a (the intervention was<br>fully monitored)  |           |
| 41 |                        | intervention(s)                              |                                                |           |
| 42 |                        |                                              |                                                |           |
| 43 |                        |                                              |                                                |           |
| 44 |                        |                                              |                                                |           |
| 45 | <a href="#">#13d</a>   | Observed associations between outcomes,      | 13,14                                          |           |
| 46 |                        | interventions, and relevant contextual       |                                                |           |
| 47 |                        | elements                                     |                                                |           |
| 48 |                        |                                              |                                                |           |
| 49 |                        |                                              |                                                |           |
| 50 |                        |                                              |                                                |           |
| 51 |                        |                                              |                                                |           |
| 52 |                        |                                              |                                                |           |
| 53 | <a href="#">#13e</a>   | Unintended consequences such as              | 13,14, 18-20                                   |           |
| 54 |                        | unexpected benefits, problems, failures, or  |                                                |           |
| 55 |                        | costs associated with the intervention(s).   |                                                |           |
| 56 |                        |                                              |                                                |           |
| 57 |                        |                                              |                                                |           |
| 58 |                        |                                              |                                                |           |
| 59 |                        |                                              |                                                |           |
| 60 |                        |                                              |                                                |           |

|    |                   |                      |                                             |                                |
|----|-------------------|----------------------|---------------------------------------------|--------------------------------|
| 1  |                   | <a href="#">#13f</a> | Details about missing data                  | n/a (no missing data)          |
| 2  |                   |                      |                                             |                                |
| 3  |                   |                      |                                             |                                |
| 4  |                   |                      |                                             |                                |
| 5  |                   |                      |                                             |                                |
| 6  |                   |                      |                                             |                                |
| 7  |                   |                      |                                             |                                |
| 8  |                   |                      |                                             |                                |
| 9  |                   |                      |                                             |                                |
| 10 |                   |                      |                                             |                                |
| 11 | <b>Discussion</b> |                      |                                             |                                |
| 12 |                   |                      |                                             |                                |
| 13 |                   |                      |                                             |                                |
| 14 | Summary           | <a href="#">#14a</a> | Key findings, including relevance to the    | 24                             |
| 15 |                   |                      | rationale and specific aims                 |                                |
| 16 |                   |                      |                                             |                                |
| 17 |                   |                      |                                             |                                |
| 18 |                   |                      |                                             |                                |
| 19 | Summary           | <a href="#">#14b</a> | Particular strengths of the project         | 26,27                          |
| 20 |                   |                      |                                             |                                |
| 21 |                   |                      |                                             |                                |
| 22 | Interpretation    | <a href="#">#15a</a> | Nature of the association between the       | 24,25                          |
| 23 |                   |                      | intervention(s) and the outcomes            |                                |
| 24 |                   |                      |                                             |                                |
| 25 |                   |                      |                                             |                                |
| 26 |                   |                      |                                             |                                |
| 27 | Interpretation    | <a href="#">#15b</a> | Comparison of results with findings from    | 25,26                          |
| 28 |                   |                      | other publications                          |                                |
| 29 |                   |                      |                                             |                                |
| 30 |                   |                      |                                             |                                |
| 31 |                   |                      |                                             |                                |
| 32 |                   |                      |                                             |                                |
| 33 | Interpretation    | <a href="#">#15c</a> | Impact of the project on people and systems | n/a (the project determined    |
| 34 |                   |                      |                                             | if it is feasible to apply the |
| 35 |                   |                      |                                             | non-pharmacological            |
| 36 |                   |                      |                                             | intervention in a feasibility  |
| 37 |                   |                      |                                             | RCT)                           |
| 38 |                   |                      |                                             |                                |
| 39 |                   |                      |                                             |                                |
| 40 |                   |                      |                                             |                                |
| 41 |                   |                      |                                             |                                |
| 42 |                   |                      |                                             |                                |
| 43 |                   |                      |                                             |                                |
| 44 |                   |                      |                                             |                                |
| 45 | Interpretation    | <a href="#">#15d</a> | Reasons for any differences between         | 26                             |
| 46 |                   |                      | observed and anticipated outcomes,          |                                |
| 47 |                   |                      | including the influence of context          |                                |
| 48 |                   |                      |                                             |                                |
| 49 |                   |                      |                                             |                                |
| 50 |                   |                      |                                             |                                |
| 51 |                   |                      |                                             |                                |
| 52 |                   |                      |                                             |                                |
| 53 | Interpretation    | <a href="#">#15e</a> | Costs and strategic trade-offs, including   | n/a (The study did not         |
| 54 |                   |                      | opportunity costs                           | assess cost-effectiveness)     |
| 55 |                   |                      |                                             |                                |
| 56 |                   |                      |                                             |                                |
| 57 |                   |                      |                                             |                                |
| 58 | Limitations       | <a href="#">#16a</a> | Limits to the generalizability of the work  | 26,27                          |
| 59 |                   |                      |                                             |                                |
| 60 |                   |                      |                                             |                                |

|    |                    |                      |                                                 |        |
|----|--------------------|----------------------|-------------------------------------------------|--------|
| 1  | Limitations        | <a href="#">#16b</a> | Factors that might have limited internal        | 26     |
| 2  |                    |                      | validity such as confounding, bias, or          |        |
| 3  |                    |                      | imprecision in the design, methods,             |        |
| 4  |                    |                      | measurement, or analysis                        |        |
| 5  |                    |                      |                                                 |        |
| 6  |                    |                      |                                                 |        |
| 7  |                    |                      |                                                 |        |
| 8  |                    |                      |                                                 |        |
| 9  |                    |                      |                                                 |        |
| 10 |                    |                      |                                                 |        |
| 11 | Limitations        | <a href="#">#16c</a> | Efforts made to minimize and adjust for         | 26     |
| 12 |                    |                      | limitations                                     |        |
| 13 |                    |                      |                                                 |        |
| 14 |                    |                      |                                                 |        |
| 15 |                    |                      |                                                 |        |
| 16 | Conclusion         | <a href="#">#17a</a> | Usefulness of the work                          | 24, 27 |
| 17 |                    |                      |                                                 |        |
| 18 |                    |                      |                                                 |        |
| 19 | Conclusion         | <a href="#">#17b</a> | Sustainability                                  | 27     |
| 20 |                    |                      |                                                 |        |
| 21 |                    |                      |                                                 |        |
| 22 | Conclusion         | <a href="#">#17c</a> | Potential for spread to other contexts          | 26,27  |
| 23 |                    |                      |                                                 |        |
| 24 |                    |                      |                                                 |        |
| 25 | Conclusion         | <a href="#">#17d</a> | Implications for practice and for further study | 25,26  |
| 26 |                    |                      | in the field                                    |        |
| 27 |                    |                      |                                                 |        |
| 28 |                    |                      |                                                 |        |
| 29 |                    |                      |                                                 |        |
| 30 | Conclusion         | <a href="#">#17e</a> | Suggested next steps                            | 27     |
| 31 |                    |                      |                                                 |        |
| 32 |                    |                      |                                                 |        |
| 33 |                    |                      |                                                 |        |
| 34 | <b>Other</b>       |                      |                                                 |        |
| 35 | <b>information</b> |                      |                                                 |        |
| 36 |                    |                      |                                                 |        |
| 37 |                    |                      |                                                 |        |
| 38 |                    |                      |                                                 |        |
| 39 | Funding            | <a href="#">#18</a>  | Sources of funding that supported this work.    | 31     |
| 40 |                    |                      | Role, if any, of the funding organization in    |        |
| 41 |                    |                      | the design, implementation, interpretation,     |        |
| 42 |                    |                      | and reporting                                   |        |
| 43 |                    |                      |                                                 |        |
| 44 |                    |                      |                                                 |        |
| 45 |                    |                      |                                                 |        |
| 46 |                    |                      |                                                 |        |
| 47 |                    |                      |                                                 |        |
| 48 |                    |                      |                                                 |        |

## Notes:

- 52
- 53 • 13c: n/a (the intervention was fully monitored)
- 54
- 55
- 56 • 13f: n/a (no missing data as all intervention sessions were video recorded)
- 57
- 58
- 59

- 1 • 15c: n/a (the project determined if it is feasible to apply the non-pharmacological intervention in a  
2 feasibility RCT)  
3  
4  
5
- 6 • 15e: n/a (The study did not consider cost-effectiveness) The SQUIRE 2.0 checklist is distributed  
7 under the terms of the Creative Commons Attribution License CC BY-NC 4.0. This checklist was  
8 completed on 22. September 2020 using <https://www.goodreports.org/>, a tool made by the  
9  
10  
11  
12 [EQUATOR Network](#) in collaboration with [Penelope.ai](#)  
13  
14  
15  
16  
17  
18  
19  
20  
21  
22  
23  
24  
25  
26  
27  
28  
29  
30  
31  
32  
33  
34  
35  
36  
37  
38  
39  
40  
41  
42  
43  
44  
45  
46  
47  
48  
49  
50  
51  
52  
53  
54  
55  
56  
57  
58  
59  
60

# BMJ Open

## Fidelity assessment of nurse-led non-pharmacological package of care for knee pain in the package development phase of a feasibility randomised controlled trial based in secondary-care: a mixed methods study

|                                 |                                                                                                                                                                                                                                                                                                                                                                                                                                                                                                                                                                                                                                                                                                                                                                                                                                                                                                                                                                                                                                                                                                                                                                                                                                                                                                                                                                                  |
|---------------------------------|----------------------------------------------------------------------------------------------------------------------------------------------------------------------------------------------------------------------------------------------------------------------------------------------------------------------------------------------------------------------------------------------------------------------------------------------------------------------------------------------------------------------------------------------------------------------------------------------------------------------------------------------------------------------------------------------------------------------------------------------------------------------------------------------------------------------------------------------------------------------------------------------------------------------------------------------------------------------------------------------------------------------------------------------------------------------------------------------------------------------------------------------------------------------------------------------------------------------------------------------------------------------------------------------------------------------------------------------------------------------------------|
| Journal:                        | <i>BMJ Open</i>                                                                                                                                                                                                                                                                                                                                                                                                                                                                                                                                                                                                                                                                                                                                                                                                                                                                                                                                                                                                                                                                                                                                                                                                                                                                                                                                                                  |
| Manuscript ID                   | bmjopen-2020-045242.R2                                                                                                                                                                                                                                                                                                                                                                                                                                                                                                                                                                                                                                                                                                                                                                                                                                                                                                                                                                                                                                                                                                                                                                                                                                                                                                                                                           |
| Article Type:                   | Original research                                                                                                                                                                                                                                                                                                                                                                                                                                                                                                                                                                                                                                                                                                                                                                                                                                                                                                                                                                                                                                                                                                                                                                                                                                                                                                                                                                |
| Date Submitted by the Author:   | 05-Jul-2021                                                                                                                                                                                                                                                                                                                                                                                                                                                                                                                                                                                                                                                                                                                                                                                                                                                                                                                                                                                                                                                                                                                                                                                                                                                                                                                                                                      |
| Complete List of Authors:       | Nomikos, Polykarpos; University of Nottingham, Academic Rheumatology ; University of Nottingham, NIHR Nottingham Biomedical Research Centre<br>Hall, Michelle; University of Nottingham, NIHR Nottingham Biomedical Research Centre ; University of Nottingham, School of Health Sciences<br>Fuller, Amy; University of Nottingham, Academic Rheumatology ; University of Nottingham, NIHR Nottingham Biomedical Research Centre<br>Millar, Bonnie; University of Nottingham, NIHR Nottingham Biomedical Research Centre ; University of Nottingham, Pain Centre Versus Arthritis<br>Ogollah, Reuben; University of Nottingham, Nottingham Clinical Trials Unit<br>Valdes, A; University of Nottingham, NIHR Nottingham Biomedical Research Centre ; University of Nottingham, Pain Centre Versus Arthritis<br>Doherty, Michael ; University of Nottingham, Academic Rheumatology ; University of Nottingham, Pain Centre Versus Arthritis<br>Walsh, David; University of Nottingham, NIHR Nottingham Biomedical Research Centre ; University of Nottingham, Pain Centre Versus Arthritis<br>dasNair, Roshan; University of Nottingham, Institute of Mental Health; University of Nottingham, Division of Psychiatry & Applied Psychology<br>Abhishek, A; University of Nottingham, Academic Rheumatology ; University of Nottingham, NIHR Nottingham Biomedical Research Centre |
| <b>Primary Subject Heading</b>: | Rheumatology                                                                                                                                                                                                                                                                                                                                                                                                                                                                                                                                                                                                                                                                                                                                                                                                                                                                                                                                                                                                                                                                                                                                                                                                                                                                                                                                                                     |
| Secondary Subject Heading:      | Nursing                                                                                                                                                                                                                                                                                                                                                                                                                                                                                                                                                                                                                                                                                                                                                                                                                                                                                                                                                                                                                                                                                                                                                                                                                                                                                                                                                                          |
| Keywords:                       | Knee < ORTHOPAEDIC & TRAUMA SURGERY, Rheumatology < INTERNAL MEDICINE, Musculoskeletal disorders < ORTHOPAEDIC & TRAUMA SURGERY                                                                                                                                                                                                                                                                                                                                                                                                                                                                                                                                                                                                                                                                                                                                                                                                                                                                                                                                                                                                                                                                                                                                                                                                                                                  |
|                                 |                                                                                                                                                                                                                                                                                                                                                                                                                                                                                                                                                                                                                                                                                                                                                                                                                                                                                                                                                                                                                                                                                                                                                                                                                                                                                                                                                                                  |

SCHOLARONE™  
Manuscripts



1  
2  
3  
4  
5  
6  
7  
8  
9  
10  
11  
12  
13  
14  
15  
16  
17  
18  
19  
20  
21  
22  
23  
24  
25  
26  
27  
28  
29  
30  
31  
32  
33  
34  
35  
36  
37  
38  
39  
40  
41  
42  
43  
44  
45  
46  
47  
48  
49  
50  
51  
52  
53  
54  
55  
56  
57  
58  
59  
60



I, the Submitting Author has the right to grant and does grant on behalf of all authors of the Work (as defined in the below author licence), an exclusive licence and/or a non-exclusive licence for contributions from authors who are: i) UK Crown employees; ii) where BMJ has agreed a CC-BY licence shall apply, and/or iii) in accordance with the terms applicable for US Federal Government officers or employees acting as part of their official duties; on a worldwide, perpetual, irrevocable, royalty-free basis to BMJ Publishing Group Ltd ("BMJ") its licensees and where the relevant Journal is co-owned by BMJ to the co-owners of the Journal, to publish the Work in this journal and any other BMJ products and to exploit all rights, as set out in our [licence](#).

The Submitting Author accepts and understands that any supply made under these terms is made by BMJ to the Submitting Author unless you are acting as an employee on behalf of your employer or a postgraduate student of an affiliated institution which is paying any applicable article publishing charge ("APC") for Open Access articles. Where the Submitting Author wishes to make the Work available on an Open Access basis (and intends to pay the relevant APC), the terms of reuse of such Open Access shall be governed by a Creative Commons licence – details of these licences and which [Creative Commons](#) licence will apply to this Work are set out in our licence referred to above.

Other than as permitted in any relevant BMJ Author's Self Archiving Policies, I confirm this Work has not been accepted for publication elsewhere, is not being considered for publication elsewhere and does not duplicate material already published. I confirm all authors consent to publication of this Work and authorise the granting of this licence.

1  
2  
3  
4 Fidelity assessment of nurse-led non-pharmacological package of care for knee pain  
5 in the package development phase of a feasibility randomised controlled trial based  
6 in secondary-care: a mixed methods study  
7  
8  
9

10  
11 Polykarpos Angelos Nomikos<sup>1,2</sup>, Michelle Hall<sup>2,3</sup>, Amy Fuller<sup>1,2</sup>, Bonnie Millar<sup>2,4</sup>,  
12 Reuben Ogollah<sup>5</sup>, Ana Valdes<sup>2,4</sup>, Michael Doherty<sup>1,4</sup>, David A Walsh<sup>2,4</sup>, Roshan das  
13 Nair<sup>6,7</sup>, Abhishek Abhishek<sup>1,2</sup>  
14  
15  
16

17 1 Academic Rheumatology, University of Nottingham, Nottingham, UK

18  
19 2 NIHR Nottingham Biomedical Research Centre, University of Nottingham,  
20 Nottingham, UK  
21  
22

23 3 School of Health Sciences, University of Nottingham, Nottingham, UK  
24

25 4 Pain Centre Versus Arthritis, University of Nottingham, Nottingham, UK  
26  
27

28 5 Nottingham Clinical Trials Unit, University of Nottingham, Nottingham, UK  
29

30 6 Institute of Mental Health, University of Nottingham, Nottingham, UK  
31

32 7 Division of Psychiatry & Applied Psychology, University of Nottingham,  
33 Nottingham, UK  
34  
35

36 Corresponding author:

37 Polykarpos Angelos Nomikos  
38

39 A 26 Clinical Sciences Building  
40

41 Nottingham City Hospital  
42

43 Hucknall Road  
44

45 Nottingham  
46

47 NG5 1PB  
48

49 UK  
50

51 E-mail address: Polykarpos.nomikos@nottingham.ac.uk  
52  
53

54  
55 Word count (excluding title page, abstract, references, figures and tables): 4627  
56  
57  
58  
59  
60

## ABSTRACT

**Objectives:** To evaluate fidelity of delivery of a nurse-led non-pharmacological complex intervention for knee pain.

**Setting:** Secondary care. Single centre study.

**Study design:** Mixed methods study.

**Participants:** Eighteen adults with chronic knee pain.

**Inclusion criteria:** Age > 40 years, knee pain present for longer than 3 months, knee pain for most days of the previous month, at least moderate pain in two of the five domains of Western Ontario and McMaster Universities Osteoarthritis Index pain scale.

**Interventions:** Nurse-led non-pharmacological intervention comprising assessment, education, exercise, use of hot/cold treatments, footwear modification, walking aids, and weight-loss advice (if required).

**Outcome(s):** Primary: Fidelity of delivery of intervention, Secondary: nurses' experience of delivering intervention.

**Methods:** Each intervention session with every participant was video recorded and formed part of fidelity assessment. Fidelity checklists were completed by the research nurse after each session and by an independent researcher, after viewing the video-recordings blinded to nurse ratings. Fidelity scores (%), percentage agreement and 95% Confidence Intervals (CI) were calculated. Two semi-structured interviews were conducted with the research nurse.

**Results:** Fourteen participants completed all visits. 62 treatment sessions took place. Nurse self-report and assessor video rating scores for all 62 treatment sessions were

1  
2  
3 included in fidelity assessment. Overall fidelity was higher on nurse self-report (97.7%)  
4 than on objective video-rating (84.2%). Percentage agreement between nurse self-  
5 report and video-rating was 73.3% (95% CI: 71.3 - 75.3). Fidelity was lowest for advice  
6 on footwear and walking aids. The nurse reported difficulty advising on thermal  
7 treatments, footwear and walking aids, and did not feel confident negotiating  
8 achievable and realistic goals with participants.  
9  
10  
11  
12  
13  
14  
15

16  
17 **Conclusions:** A trained research nurse can deliver most components of a non-  
18 pharmacological intervention for knee pain to a high degree of fidelity. Future research  
19 should assess intervention fidelity in a routine clinical setting, and examine its clinical  
20 and cost-effectiveness.  
21  
22  
23  
24  
25

26  
27 **Trial registration number:** NCT03670706  
28  
29  
30

31  
32 **KEY WORDS:** Knee pain, fidelity, nurse-led intervention, osteoarthritis  
33  
34  
35  
36  
37

### 38 **STRENGTHS AND LIMITATIONS OF THE STUDY**

39  
40

- 41 • This mixed methods study used a combination of techniques to assess treatment  
42 fidelity.  
43
- 44 • We triangulated the fidelity scores with the findings from interview study and  
45 found convergence providing internal validity.  
46
- 47 • We identified the components not delivered as intended.  
48
- 49 • A single nurse was involved in delivery of the intervention  
50
- 51 • Lack of formal assessment of nurse knowledge of managing knee osteoarthritis.  
52  
53  
54  
55  
56  
57  
58  
59  
60

## INTRODUCTION

Osteoarthritis (OA) is the commonest form of arthritis and is managed predominantly in primary care in the UK. The knee is commonly affected, with approximately one in four adults over the age of 50 years in the UK self-reporting chronic knee pain, defined as pain for 3-months or longer within the previous 12 months.<sup>1</sup> In the presence of activity related joint pain, no or minimal morning stiffness, and age  $\geq$  45 years, a clinical diagnosis of OA may be reached without the need of investigations (e.g. blood tests or radiography) as per the National Institute for Health and Care Excellence (NICE) guidelines.<sup>2</sup> These guidelines<sup>2</sup> also recommend a patient-centred approach when managing OA, with a focus on non-pharmacological interventions including education, strengthening, and aerobic exercise, and weight loss if required. However, this can be difficult for general practitioners (GPs) to deliver for several reasons such as time constraints and, core non-pharmacological treatments are under-utilised.<sup>3 4</sup> Nurse-led care gives similar or better outcomes than GP-led care for other chronic diseases.<sup>5-8</sup> However, the fidelity of delivery of nurse-led care has not been examined for the management of knee OA.

Fidelity, defined as the degree to which an intervention is delivered as intended,<sup>9</sup> regulates the relationship between interventions and outcomes, and determines the extent to which an intervention affects the outcome.<sup>10</sup> Inferences regarding treatment effect of a complex intervention should therefore not be made without assessing fidelity, because lack of efficacy of an intervention may be due to inadequate implementation.<sup>11</sup> Thus, the fidelity of intervention delivery influences the internal and external validity of a study.<sup>12</sup> If fidelity is not assessed, effective interventions may be rejected due to poor delivery.<sup>13 14</sup>

1  
2  
3 There are several methods to assess treatment fidelity, including direct observation,  
4 patient self-report questionnaires and provider self-report checklists, and indirect  
5 observation using audio or video-recordings <sup>13</sup>, which may be used singularly or in  
6 combination. Direct observation is considered the gold-standard, however, it can be  
7 intrusive and may affect patient practitioner interaction, <sup>15 16</sup> and may not be feasible  
8 in large randomised controlled trials (RCTs). Provider self-report methods are simple  
9 and inexpensive but can be inaccurate, <sup>17</sup> and patient report methods are even less  
10 reliable. <sup>13</sup> Video-recording the delivery of intervention and independent assessment  
11 of fidelity may provide a robust alternative to direct observation. <sup>18</sup> Indeed, it has been  
12 shown previously that assessing fidelity using independently rated recordings and  
13 provider self-report checklist is feasible and acceptable. <sup>19 20 21</sup> A combination of  
14 provider self-report and independent assessed video recording was utilised in the  
15 current study to provide an in-depth fidelity assessment. <sup>22</sup> Video recordings were  
16 chosen as this is less intrusive than direct observation and provide an opportunity to  
17 assess reliability.

18  
19  
20  
21  
22  
23  
24  
25  
26  
27  
28  
29  
30  
31  
32  
33  
34  
35  
36  
37  
38 Medical Research Council guidelines for developing and evaluating complex  
39 interventions <sup>23</sup> have highlighted the importance of conducting process evaluation. Its'  
40 purpose is to assess the quality and quantity of the implementation of intervention,  
41 and trials that collect rich qualitative data may identify potential barriers and facilitators  
42 to intervention implementation. However, collecting only qualitative or quantitative  
43 data to assess treatment delivery would not unearth a comprehensive picture to  
44 understand complex constructs within the intervention. <sup>24</sup> For this reason, a mixed  
45 methods approach was utilised. <sup>25</sup>

46  
47  
48  
49  
50  
51  
52  
53  
54  
55  
56  
57  
58  
59  
60  
The present study is part of the East-Midlands Knee Pain Cohort RCT study, <sup>26</sup> the  
overall purpose of which is to evaluate the feasibility of a nurse-led package of care

1  
2  
3 for knee pain due to OA. The objective of the present study was to evaluate the fidelity  
4 of delivery of a nurse-led non-pharmacological package of care for knee pain during  
5 the package development phase of the RCT.  
6  
7  
8  
9  
10  
11  
12  
13  
14  
15  
16  
17  
18  
19  
20  
21  
22  
23  
24  
25  
26  
27  
28  
29  
30  
31  
32  
33  
34  
35  
36  
37  
38  
39  
40  
41  
42  
43  
44  
45  
46  
47  
48  
49  
50  
51  
52  
53  
54  
55  
56  
57  
58  
59  
60

For peer review only



## METHODS

**Study Design:** A mixed methods study with an explanatory sequential and convergent design. This form of mixed methods approach was used to produce additional insights of the issue at hand. In this design, qualitative and quantitative data are collected and complementary results arise from the use of different methods.<sup>27</sup> In the current study, the quantitative data informed the collection of qualitative data and a convergence approach was followed.

**Setting:** Academic Rheumatology, City Hospital Nottingham.

**Participants and Recruitment:** The participants were adults self-reporting knee pain. Community dwelling adults participating in the Investigating Musculoskeletal Health and Wellbeing (IMHW) cohort,<sup>28</sup> self-reporting knee pain were sent a postal invitation to participate in this study. People who responded underwent telephone screening to assess eligibility. The inclusion criteria were: age > 40 years, ability to read and write in English, knee pain present for longer than three months, pain in or around the knee on most days of the previous month, and at least moderate pain in two of the five domains of the Western Ontario and McMaster Universities Osteoarthritis Index (WOMAC) pain scale.<sup>29</sup>

**Research nurse training:** A training programme to enable a nurse to deliver the current NICE guidelines for OA management was developed and an educational manual produced.<sup>26</sup> The training included face-to-face learning, case-studies, on-line resources and simulated patients. Practical sessions on assessing the participant, delivering and modifying exercise, weight loss advice and use of strategies to encourage adherence were also included. The nurse delivering the intervention was working as a research nurse previously and did not have prior knowledge of musculoskeletal diseases, had not worked in rheumatology or allied specialties such

1  
2  
3 as orthopaedics, rehabilitation or sports medicine, and had never delivered treatments  
4  
5 for arthritis.  
6  
7

8 **Patient and Public Involvement:** Three PPI members with hip and/or knee OA  
9  
10 provided input into the content of the non-pharmacological treatment package, and  
11  
12 volunteered for nurse training. They advised that video recording of treatment sessions  
13  
14 would be acceptable to participants.  
15  
16

17  
18 **Intervention:** The template for intervention description and replication (TIDieR)  
19  
20 checklist <sup>30</sup> has been used to describe the intervention and its key features (Additional  
21  
22 file 1). In brief, the intervention consisted of a holistic assessment of the participant,  
23  
24 providing education about the nature of OA and self-management strategies including  
25  
26 advice on the role of exercise, maintaining a healthy weight, and use of adjunctive  
27  
28 treatments such as application of heat or cold, foot-wear modification and use of  
29  
30 walking aids. At the first visit, the nurse took a medical history, examined the knee  
31  
32 joints and explained to the participant that they had knee pain due to OA.  
33  
34 Investigations and radiographs were not undertaken as per NICE guidelines. <sup>2</sup> The  
35  
36 Chief Investigator (AA) was available for advice if a clinical diagnosis of OA could not  
37  
38 be reached. In that case, the participant would be deemed ineligible for the study. All  
39  
40 participants were given an Arthritis Research UK leaflet on knee OA. The nurse  
41  
42 explained aerobic and strengthening exercises and advised each participant on an  
43  
44 individualised regimen that was mutually agreed. If required, weight-loss advice was  
45  
46 provided. Behaviour change strategies <sup>31</sup> such as goal setting, action planning,  
47  
48 assessment of participant confidence to achieve goals, discussion of barriers and  
49  
50 facilitators and the use of exercise diaries were used to improve adherence. Functional  
51  
52 goals were agreed and were used to facilitate the exercise prescription with goals  
53  
54 being Specific, Measurable, Achievable, Relevant, and Timely (SMART). SMART  
55  
56  
57  
58  
59  
60

1  
2  
3 weight loss goals were agreed also with overweight participants. The intervention is  
4 described in more detail in the protocol.<sup>26</sup> After the training period, the nurse delivered  
5 the intervention in four sessions over a five-week period.  
6  
7  
8

9  
10 **Ethical approval:** The study received ethical approval by the East Midlands-Derby  
11 Research Ethics Committee (REC) (18/EM/0288).  
12  
13

14  
15 **Consent:** All study participants including the research nurse gave their written  
16 informed consent prior to treatment delivery, including the consent to video record the  
17 sessions. Participants had the right to pause or stop the video recording at any point  
18 without giving any reasons.  
19  
20  
21  
22  
23

24  
25 **Fidelity assessment:** The study followed the National Institutes of Health Behaviour  
26 Change Consortium (NIHBCC) guidelines for fidelity assessment.<sup>13</sup> The fidelity  
27 checklist was developed a priori<sup>26</sup> and comprised eight components, each with  
28 specific tasks: materials; introduction; assessment; education; exercise; weight loss;  
29 advice on adjunctive treatments; and review and planning. However, not all  
30 components of the intervention were intended to be delivered in each session.<sup>26</sup> For  
31 example, advice on the adjunctive treatments could be provided in any of the four  
32 sessions. The fidelity checklist was iteratively developed using a five-step  
33 methodology.<sup>32</sup> These were: reviewing previous measures, analysing intervention  
34 components and developing an intervention framework (intervention manual),  
35 developing the fidelity checklist, obtaining feedback about the content and wording of  
36 checklist and piloting and refining the checklist to assess and improve reliability. The  
37 responses of the fidelity checklist were categorical and rated as completed, partially  
38 completed, not completed, or not applicable. Partially completed scores were given  
39 for any task that was not delivered to the full extent in the context of that particular  
40  
41  
42  
43  
44  
45  
46  
47  
48  
49  
50  
51  
52  
53  
54  
55  
56  
57  
58  
59  
60

1  
2  
3 consultation. The scoring criteria of the fidelity checklist followed that of previous  
4 published strategies for assessing fidelity in RCTs of complex interventions.<sup>33</sup>  
5  
6  
7

8 Eighteen participants received the non-pharmacological intervention and all (n=62)  
9 sessions were video-recorded. After every session with the participant, the nurse  
10 completed the fidelity checklist. Sixty-two checklists, 18 for session 1, 16 for session  
11 2 and 14 each for sessions 3 and 4 were completed. Blinded to the nurse ratings, the  
12 video-recording of every session was independently reviewed and rated by PAN. A  
13 second-rater (MH) independently rated 20% (n=12) of the sessions. Both raters were  
14 familiar with the intervention. The refinement, reliability, and feasibility of the fidelity  
15 checklist was established during the initial phases of the data collection process.  
16  
17  
18  
19  
20  
21  
22  
23  
24  
25

26  
27 **Quantitative data analysis:** Mean and standard deviation (SD), median and inter  
28 quartile range (IQR), and n (%), were calculated for descriptive purposes. Within a  
29 component, tasks rated as 'completed' were given a score of 2, 'partially completed' a  
30 score of 1, and not completed, a score of zero. To obtain fidelity score for a component  
31 of the intervention, individual scores for each task within the component were added  
32 and divided by the maximum possible score for that component and converted to a  
33 percentage. Any tasks that were rated as not-applicable, were excluded from the  
34 calculation.  
35  
36  
37  
38  
39  
40  
41  
42  
43  
44

45  
46 Median fidelity scores (%) and IQR were calculated for the entire intervention, per  
47 participant, per session and per component of the intervention. Fidelity was classified  
48 as previously reported: 80-100% 'high', 51-79% 'moderate', and 0-50% 'low' fidelity.  
49  
50

51  
52 <sup>34</sup> Where fidelity was moderate or low in a particular component, we further explored  
53 this by examining the fidelity of delivery of the individual tasks.  
54  
55  
56  
57  
58  
59  
60

1  
2  
3 Percentage agreement with 95% confidence intervals (CI) was used to estimate the  
4 level of agreement between self-report and video-record methods, and for inter-rater  
5 agreement.  
6  
7  
8

9  
10 **Qualitative phase:** One week after the final session, the nurse took part in a semi-  
11 structured interview conducted by PAN (PhD student) and AF (trained qualitative  
12 researcher). The interview guide (Additional file 2) contained open-ended questions  
13 developed by the study team, which included a rheumatologist (AA), physiotherapists  
14 (MH, PAN), psychologist (RdN), and qualitative researcher (AF). The guide covered  
15 the nurse's view on their training, confidence in and experience of delivering the  
16 individual components of the non-pharmacological intervention, perceived barriers to  
17 delivering it as planned, and opportunities to improve the non-pharmacological  
18 package of care. An iterative process was used for data collection, so an additional  
19 interview was conducted 45 weeks later to capture any salient points raised from the  
20 initial quantitative and qualitative data collected.  
21  
22  
23  
24  
25  
26  
27  
28  
29  
30  
31  
32  
33  
34  
35

36 Before starting the interview, it was explained that the nurse's responses would remain  
37 confidential and that any quotes included in future publications would not identify them.  
38  
39 The nurse was informed of the right to withdraw from the interview at any time. We  
40 have not provided demographic details in order to protect the anonymity of the  
41 individual nurse. All interviews were conducted in a private room in Academic  
42 Rheumatology, City Hospital, Nottingham. The qualitative findings were mapped onto  
43 the fidelity checklist to assess convergence between the quantitative and qualitative  
44 findings. Any areas of uncertainty or gaps were then explored in the second interview  
45 with the nurse.  
46  
47  
48  
49  
50  
51  
52  
53  
54  
55  
56  
57  
58  
59  
60

1  
2  
3 **Qualitative data analysis:** The interviews were transcribed verbatim by an external  
4 transcription company. The interviewer removed any identifiers and ensured  
5 transcripts were accurate. Transcripts were analysed following the principles of the  
6 general inductive approach.<sup>35</sup> The latter is a simple straightforward approach, which  
7 is used to derive findings from raw qualitative data, condense them into a brief  
8 summary format, and link the research objectives with the summary findings.  
9

10  
11  
12 The first transcript was read several times before data related to the research  
13 objectives was identified, labelled and categorised. The categories were discussed  
14 between the interviewer and a second researcher (AF). This process identified gaps  
15 and led to the second interview and the transcript was analysed in the same way.  
16 Following agreement that the categories reflected the overall account reported by the  
17 nurse, extracts were taken from the transcripts to exemplify the findings.  
18  
19

20  
21 **Convergence:** A meta-matrix was developed to explore convergence between the  
22 findings. This approach enhances study validity by increasing the probability that our  
23 findings and interpretations are credible and reliable.<sup>24</sup> Convergence was defined as  
24 agreement between both sets of data, and discrepancy as disagreement between  
25 them.  
26  
27

28  
29 **Reporting guidelines:** The Standards for Quality Improvement Reporting Excellence  
30 (SQUIRE) guidelines<sup>36</sup> were used to improve the quality of reporting of this study.  
31  
32  
33  
34  
35  
36  
37  
38  
39  
40  
41  
42  
43  
44  
45  
46  
47  
48  
49  
50  
51  
52  
53  
54  
55  
56  
57  
58  
59  
60

## RESULTS

### Quantitative findings:

Eighteen participants (33% women) with knee pain for longer than 3 months, with a mean age of 68.7 (SD 9.0) years and body mass index of 31.2 (SD 8.4) kg/m<sup>2</sup> respectively took part in the study. Of these, fourteen completed all four visits. The reasons for dropping out were other commitments (n=3), reluctance to lose weight (n=1) and inadequate understanding of the nature of the intervention (n=1).

In total, 62 intervention sessions were delivered. The median (IQR) duration of the initial and follow-up sessions was 87 (81–101) and 46 (37–52) minutes respectively. Overall fidelity was rated high for both nurse self-report (97.7%) and video-rated scores (84.2%) (Tables 1, 2). Inter-rater agreement for the video-recording checklist was 70.3% (95%CI 64.4, 74.2).

For the nurse self-report checklist, median fidelity scores for each session ranged from 94.4-100% (Table 1). Individual components received high ratings except for adjunctive treatments i.e. use of heat/cold therapy and advice on footwear where the fidelity score was moderate in many sessions.

For the video-rated checklists, overall median fidelity scores for each session ranged from 77.7-87.2% (Table 2). Fidelity for education was lower in the first session (78.1%, IQR 74.1, 93.8) but increased in the follow-up session (87.5%, IQR 50,100). Fidelity for review and planning was lower in the first and last sessions. Fidelity scores were low for adjunctive treatments across all sessions, and varied from 0% to 50%. Fidelity of delivery for exercise goal-setting was moderate at 66% and, fidelity for reviewing goals during follow-up sessions was low, ranging between 44-50%. Additionally,

1  
2  
3 assessment of patients' level of confidence to achieve their exercise goal was low in  
4  
5 the follow-up sessions, ranging between 7-40%.  
6  
7

8 The overall agreement between nurse-rated and video-rated methods was 73.3%  
9  
10 (95% CI 71.3 - 75.3). The level of agreement for individual components is shown in  
11  
12 Figure 1. Excellent agreement was found for materials, introduction, and assessment.  
13  
14 Agreement was below the cut-off point of 80% for education, exercise, weight loss and  
15  
16 adjunctive treatment. The level of agreement for review and planning component was  
17  
18 58.1% (95% CI 44.8, 70.5). For individual participants, overall fidelity across the four  
19  
20 sessions ranged from 75% to 100% indicating that for most patients the intervention  
21  
22 was delivered as intended (Table 3).  
23  
24  
25  
26  
27  
28  
29  
30  
31  
32  
33  
34  
35  
36  
37  
38  
39  
40  
41  
42  
43  
44  
45  
46  
47  
48  
49  
50  
51  
52  
53  
54  
55  
56  
57  
58  
59  
60



**Table 1.** Nurse self-reported fidelity scores <sup>1</sup>

| Intervention component | Session1<br>(n=18)* | Session 2<br>(n=16)* | Session 3<br>(n=14)* | Session 4<br>(n=14)* |
|------------------------|---------------------|----------------------|----------------------|----------------------|
| Materials              | 100 (100, 100)      | -                    | -                    | -                    |
| Introduction           | 100 (100, 100)      | -                    | -                    | -                    |
| Assessment             | 100 (98.3, 100)     | 100 (100, 100)       | 100 (100, 100)       | 100 (100, 100)       |
| Education              | 100 (100, 100)      | 100 (100, 100)       | 100 (100, 100)       | 100 (100, 100)       |
| Exercise               | 100 (97.5, 100)     | 100 (100, 100)       | 100 (97.5, 100)      | 100 (75, 100)        |
| Weight loss            | 100 (88.9, 100)     | 100 (100, 100)       | 100 (66.7, 100)      | 100 (79.2, 100)      |
| Adjunct treatments     | 87.5 (33.3, 100)    | 87.5 (0, 100)        | 66.7 (45.8, 100)     | -                    |
| Review and planning    | 100 (100, 100)      | 100 (100, 100)       | 100 (100, 100)       | 100 (100, 100)       |

<sup>1</sup>Values are median% (IQR)

\*Number of sessions

**Table 2.** Fidelity scores using video-recordings of the sessions<sup>1</sup>

| Intervention        | Session 1         | Session 2       | Session 3*      | Session 4       |
|---------------------|-------------------|-----------------|-----------------|-----------------|
| Component           | (n=18)*           | (n=16)*         | (n=14)*         | (n=14)*         |
| Materials           | 100 (100, 100)    | -               | -               | -               |
| Introduction        | 100 (75, 100)     | -               | -               | -               |
| Assessment          | 91.4 (85, 93.3)   | 100 (100, 100)  | 100 (100, 100)  | 100 (100, 100)  |
| Education           | 78.1 (74.1, 93.8) | 87.5 (50, 100)  | 87.5 (50, 100)  | 100 (93.8, 100) |
| Exercise            | 94.4 (88.9, 100)  | 88.9 (75, 94.4) | 86.1 (72, 100)  | 75 (67.6, 82.8) |
| Weight loss         | 100 (87.5, 100)   | 90 (60, 100)    | 100 (68.9, 100) | 80 (49.2, 100)  |
| Adjunct treatments  | 50 (45.8, 100)    | 0 (0, 50)       | 50 (0, 100)     | -               |
| Review and planning | 75 (75, 100)      | 100 (100, 100)  | 100 (100, 100)  | 75 (37.5, 100)  |

<sup>1</sup>Values are median% (IQR),

\*Number of sessions

**Table 3.** Fidelity scores assessed using video-recordings across participants<sup>1</sup>

| Participant number | Overall sessions |
|--------------------|------------------|
| Participant 1      | 88.9 (75, 100)   |
| Participant 2      | 83.3 (41.7, 100) |
| Participant 3      | 100 (67.5, 100)  |
| Participant 4*     | 96.7 (88.9, 100) |
| Participant 5      | 75 (45, 100)     |
| Participant 6      | 100 (80, 100)    |
| Participant 7      | 100 (89.9, 100)  |
| Participant 8*     | 100 (95.8, 100)  |
| Participant 9      | 92.9 (50, 100)   |
| Participant 10     | 93.7 (77.5, 100) |
| Participant 11*    | 75 (50, 97.2)    |
| Participant 12     | 73.8 (18.8, 100) |
| Participant 13     | 100 (67, 100)    |
| Participant 14     | 100 (79, 100)    |
| Participant 15     | 85 (56, 100)     |
| Participant 16     | 100 (75, 100)    |
| Participant 17     | 100 (80, 100)    |
| Participant 18*    | 100 (81, 100)    |

<sup>1</sup>Values are median% (IQR)

\*Participants dropped out. The percentage fidelity score is calculated using scores from the sessions attended.

### Qualitative findings:

The duration of the initial and follow-up interview with the nurse was 94 minutes, and 34 minutes respectively. The nurse reported feeling nervous when delivering the intervention for the very first time, but felt more comfortable as the sessions progressed.

*“Very nervous... to start with... I don't think after a few sessions I was uncomfortable, I was probably more comfortable delivering the intervention...after few sessions, got better at getting feedback from patient as well so I think that boosted my confidence”.*

The nurse felt that patient assessment was easy to deliver considering their previous experience of assessing patients for other diseases.

*“I would say some of them were easy to find pinpoint the problems...as a nurse we always been asking these questions to patients... in this case but had previous experience in that area”*

The nurse felt that education was not always delivered as well in the first few sessions as in the follow-up sessions. They felt that there was a lot of information for the participants to take on board during that first initial assessment session and recommended that the advice could be spread over two or three sessions.

*“First few sessions I didn't think of as very good to tell them about the information and then later on, I built that ...”*

*“I think that session could be divided, erm, the very first one at least in two sessions... so first session, you just get to know the patient and they get their*

1  
2  
3 *feedback and, don't give them any, too much of a diet and weight loss*  
4  
5 *information"*  
6  
7

8 The nurse described how they initially lacked confidence in prescribing exercise, which  
9 was a new skill, to the patients.  
10

11  
12  
13 *"I had to decide after the assessment which exercise I'm going to assign them*  
14 *and I didn't feel comfortable... "I wasn't sure that whatever assessment I have*  
15 *done and the exercise I choose, that's going to make it any better ... I wasn't*  
16 *100% sure".*  
17  
18  
19  
20  
21  
22

23 On the other hand, it was easier to determine and link the exercises for patients who  
24 already had obvious problems in their knees.  
25

26  
27  
28 *"When there are obviously problems in the knee you can see, you can link what*  
29 *exercise... when you can't see the obvious problems, then it was difficult to*  
30 *determine what exercise you are going to assign"*  
31  
32  
33  
34  
35

36 They felt more confident and were able to adapt the exercises as they became more  
37 familiar with the exercises and having received feedback from the patients.  
38

39  
40  
41 *"I felt comfortable altering the exercise for them,... knowing that obviously, if it's*  
42 *painful for them then switching to a different exercise."*  
43  
44  
45  
46

47 The nurse delivered the weight loss advice with ease compared with the exercise and  
48 was able to explain to patients why it is good to lose weight where required.  
49

50  
51  
52 *"For the weight loss, you easily do that... I didn't feel too much*  
53 *uncomfortable...so positive from that is that I managed to tell everyone."*  
54  
55  
56  
57  
58  
59  
60

1  
2  
3 Even though they felt it was not difficult to deliver or incorporate the adjunctive  
4 treatments, they occasionally forgot to mention them or felt it was not necessary to  
5 repeat this in a subsequent session.  
6  
7  
8

9  
10 *“I do not think it was difficult to ask that or incorporate... it was probably as a*  
11 *human error or that you forgot to mention it...with some patients if you already*  
12 *mentioned once or twice, so with the first session, that if you need to you can*  
13 *use hot and cold therapy, and then they refuse it ... then there is no point*  
14 *[mentioning it again]”*  
15  
16  
17  
18  
19  
20  
21  
22

23 The nurse found it challenging to negotiate realistic goals with some patients,  
24 especially those who had high expectations but rated their confidence in achieve their  
25 goals as low.  
26  
27  
28

29  
30 *“The difficulty is that the goal setting they would expect high but then they when*  
31 *you ask them how likely you are going to achieve this goal their rating will be*  
32 *low... their rating will be like 4 or 5 and how you motivate them to go up to 8 or*  
33 *7, 8, 9, that one’s kind of difficult.”*  
34  
35  
36  
37  
38  
39

40 However, the nurse was able to reduce the expectation that was initially set for that  
41 particular goal for those patients.  
42  
43  
44

45 *“Obviously there was a previous goal...yes would reduce the expectation when*  
46 *they came back, I would be able to do this, so I am sure you would be able to*  
47 *see through the videotape”*  
48  
49  
50  
51  
52  
53  
54  
55  
56  
57  
58  
59  
60

1  
2  
3 **Integrating findings:** Convergence was found between the fidelity scores and nurse  
4 interview (Table 4). The excellent fidelity scores for the holistic assessment by the  
5 nurse was reflected in their confidence of assessing patients more generally. The  
6 moderate fidelity findings for education in the first session that increased in  
7 subsequent sessions was confirmed by the nurse and explained in terms of  
8 moderating the amount of information that was given to participants in the first session.  
9  
10 Weight loss advice was delivered with high fidelity and the nurse also felt confident in  
11 being able to deliver weight loss advice fully. A perceived lack of confidence in  
12 delivering the exercise component is consistent with lower fidelity scores for the  
13 exercise component. The adjunctive treatments were not always delivered as intended  
14 and that was consistent with the interview findings. Goal setting was challenging for  
15 the nurse which was reflected in the fidelity findings. Finally, convergence was found  
16 for review and planning as the nurse found it easy to summarise patient goals at the  
17 end of each session. There were no divergent findings.  
18  
19  
20  
21  
22  
23  
24  
25  
26  
27  
28  
29  
30  
31  
32  
33  
34  
35  
36  
37  
38  
39  
40  
41  
42  
43  
44  
45  
46  
47  
48  
49  
50  
51  
52  
53  
54  
55  
56  
57  
58  
59  
60

**Table 4.** Convergence between fidelity observed using video recordings and the results from the semi-structured nurse interview

| <b>Intervention components</b> | <b>Median (%) IQR fidelity *</b> | <b>Qualitative interview findings</b>                                                                                                                                                                                                                                                            | <b>Convergence</b> |
|--------------------------------|----------------------------------|--------------------------------------------------------------------------------------------------------------------------------------------------------------------------------------------------------------------------------------------------------------------------------------------------|--------------------|
| All components                 | 84.2                             | " I find myself that ... that I can deliver the care...I was probably more comfortable delivering the intervention...after few sessions"                                                                                                                                                         | Yes                |
| Materials                      | 100 (100, 100)                   | " I had to show them the booklet every patient so I don't think I have forgotten to do that"                                                                                                                                                                                                     | Yes                |
| Introduction                   | 100 (75, 100)                    | "I explain all the study and then explain that whole process again for the purpose of the session"                                                                                                                                                                                               | Yes                |
| Assessment                     | 100 (100, 100)                   | "I would say some of them were easy to find pinpoint the problems...as a nurse we always been asking these questions to patients... in this case but had previous experience in that area"                                                                                                       | Yes                |
| Exercise                       | 88.9 (72.7, 94.4)                | "We practiced and demonstrated exercises... I felt comfortable altering the exercise for them...I just couldn't think how to link that, erm, goal setting I didn't deliver it good... I don't think I could have delivered it any better than that either... some did actually achieve the goal" | Yes                |
| Education                      | 87.5 (74.1, 100)                 | "first few sessions I didn't think of as very good to tell them about the information and then later on, I built that"                                                                                                                                                                           | Yes                |



|                     |                 |                                                                                                                                                                                                                                                                |     |
|---------------------|-----------------|----------------------------------------------------------------------------------------------------------------------------------------------------------------------------------------------------------------------------------------------------------------|-----|
| Weight loss         | 100 (77.8, 100) | "Positive from that is that I managed to tell everyone that, "you need to lose weight", so I think it was kind of structured in a way... I didn't feel too much uncomfortable"                                                                                 | Yes |
| Adjunct treatments  | 50 (0, 50)      | "it was probably as a human error or that you forgot to mention it...with some patients if you already mentioned once or twice so with the first session that you need to you can use hot and cold therapy and then they refuse it and then there is no point" | Yes |
| Review and planning | 100 (25, 100)   | "Not difficult... we always talked about it this is what we discussed it today this is the exercise we, have assigned you and if you feel that you can progress into further do so"                                                                            | Yes |

\*Median fidelity scores of the individual components across the four sessions

1  
2  
3  
4  
5  
6  
7  
8  
9  
10  
11  
12  
13  
14  
15  
16  
17  
18  
19  
20  
21  
22  
23  
24  
25  
26  
27  
28  
29  
30  
31  
32  
33  
34  
35  
36  
37  
38  
39  
40  
41  
42  
43  
44  
45  
46

## DISCUSSION

This study evaluated fidelity of delivery of a nurse-led non-pharmacological package of care for knee pain due to OA and validated the findings in an interview with the nurse that delivered it. The majority of the non-pharmacological components of the intervention were delivered with good fidelity. Excellent fidelity was found for patient assessment, education, demonstration and advice on exercise and weight loss advice. Tasks that demonstrated lower fidelity within the exercise component included goal setting and review. These were also perceived as difficult by the nurse. Advice around the use of adjunctive treatments such as the use of hot or cold treatments, walking aids and footwear, were also not always delivered as planned. Agreement between the nurse and independent rater was below the cut-off point of 80% for education, exercise, weight loss, adjunctive treatment, and review and planning, which is reported as the minimum acceptable agreement between raters.<sup>37</sup> Fidelity scores across different participants were high overall with the lowest score being 74%.

To the authors' knowledge, this is the first study that has assessed fidelity of a nurse-led non-pharmacological intervention for knee pain due to OA and integrated the findings. Our study is based on a fidelity checklist that has been previously validated in complex interventions delivered in a research setting.<sup>21</sup> We tailored the checklist according to the intervention and further refined it. Moreover, the reliability of the fidelity checklist was established when two independent viewers scored the video recordings of the sessions.

From the interview transcripts, factors that influenced fidelity of delivery are identified. The nurse was less confident to identify appropriate patient goals and prescribe exercise in the first few sessions, but this improved thereafter. This is not a barrier per

1  
2  
3 se, but suggests that some further training and additional support for nurses in this  
4  
5 new role would be needed to ensure fidelity at the start of the study. The nurse was  
6  
7 able to draw on her previous experience working with other patient groups to discuss  
8  
9 and assess complex issues. Nurse's previous experience assessing patients,  
10  
11 therefore, facilitated fidelity of delivery. Although the fidelity for education appeared to  
12  
13 be lower in the first session this was because the nurse recognised and responded  
14  
15 that participants were being given a lot of information. These findings are not surprising  
16  
17 as we aimed to train a nurse with no prior experience of managing musculoskeletal  
18  
19 diseases to deliver a complex non-pharmacological package of care for knee pain.  
20  
21 Where the nurse identified difficulties in delivering the intervention as intended, she  
22  
23 was able to seek additional advice and training from MH. This experience has allowed  
24  
25 us to further improve the nurse training programme for use in the feasibility RCT.  
26  
27  
28  
29

30  
31 Previous studies using mixed methods have explored factors that influenced fidelity  
32  
33 and found good fidelity of delivery of a physiotherapist-led complex package of care  
34  
35 for chronic low-back pain and OA.<sup>21 22</sup> They report on the factors that influenced fidelity  
36  
37 on three levels: provider, participant and programme. Williams *et al*<sup>38</sup> demonstrated  
38  
39 good fidelity of delivery of a walking intervention when delivered by nurses and  
40  
41 healthcare assistants in primary care. Even though they used a mixed methods  
42  
43 approach to assess fidelity, they did not integrate the findings. In our study, the  
44  
45 research nurse rated themselves higher than the independent rating using the video  
46  
47 recordings consistent with previous studies.<sup>32 39</sup> Similar findings on barriers and  
48  
49 facilitators have been identified in two complex interventions, one for people with  
50  
51 dementia and one for people with chronic low back pain.<sup>22 32</sup> In fact, Walton *et al*<sup>32</sup>  
52  
53 extended over the factors that influenced fidelity of delivery reported by Toomey *et al*  
54  
55<sup>22</sup> and recognised that knowledge, providers' attributes, ease of adaptation of the  
56  
57  
58  
59  
60

1  
2  
3 intervention in relation to participants' needs influenced fidelity. Based on the findings,  
4  
5 it was challenging to address adaptation and determine the appropriate balance  
6  
7 between fidelity and adaptation in this study. This may indicate some key overlapping  
8  
9 themes that may limit fidelity of delivery despite the different types of intervention and  
10  
11 conditions.  
12  
13

14  
15 There are a number of limitations to this study. A key caveat is that only one nurse  
16  
17 was involved in delivery of the intervention. In a larger trial, there would be more nurses  
18  
19 to deliver the intervention across multiple sites, which increases the likelihood of  
20  
21 variation in fidelity. This study lasted 17 weeks and this is a short period of time over  
22  
23 which fidelity may not fluctuate much. However, this can be an issue with longer  
24  
25 studies.<sup>40</sup> The nurse who delivered the intervention was interviewed but in the  
26  
27 absence of data from additional participants, emerging categories could not be revised  
28  
29 and refined into fully realised themes, however, an inductive approach to analysis was  
30  
31 taken to reflect the views of the intervention provider. A second interview with the nurse  
32  
33 was conducted to capture any salient points not discussed during the first interview.  
34  
35 We did not consider to capture engagement of the participants in the study. Complex  
36  
37 interventions are often a dynamic interplay between patient and healthcare  
38  
39 professionals. Whilst checklists can be helpful in determining whether an intervention  
40  
41 has been delivered they do not allow for or capture the flexibility that is required when  
42  
43 tailoring an intervention to the individual.  
44  
45  
46  
47  
48  
49

50  
51 The intervention was delivered by a research nurse with no background knowledge of  
52  
53 musculoskeletal diseases and no previous experience delivering treatment for  
54  
55 arthritis. This is a particular strength as we were able to assess the effectiveness of  
56  
57 our nurse training programme and its shortcomings. Additionally, we video-recorded  
58  
59 and evaluated all the consultations that were delivered. One of the key strengths of  
60

1  
2  
3 our study was that we identified the specific components of the intervention not  
4 delivered as intended. Moreover, we triangulated the findings and found convergence  
5 providing internal validity. The nurse was interviewed to address some of the NIHBC  
6 components (study design, provider training) that have not been examined previously.  
7  
8  
9  
10  
11

12 22

13  
14  
15 In conclusion, we found that nurse-led delivery of a complex package of care is  
16 feasible within a research setting. The research nurse delivered care for patients with  
17 knee pain due to OA with high fidelity for most of the components of the intervention  
18 except for advice about the use of hot/cold treatments, walking aids, footwear and goal  
19 setting. We believe that upskilling nurses to deliver complex non-pharmacological  
20 components for the management of knee pain due to OA is feasible. Nurses would  
21 have more time to spend with patients and educate them about the condition. The  
22 training package for delivery of the intervention will need to ensure that the nurses are  
23 confident in delivering the behavioural change strategies such as goal setting. Follow-  
24 up training sessions and support during the start of the feasibility when nurses are first  
25 delivering the intervention may be helpful in order to improve confidence and delivery.  
26  
27 Future work will need to consider fidelity where there will be more than one nurse  
28 delivering the intervention in a clinical setting where other factors will also influence  
29 fidelity. Our results, nevertheless, show that it is feasible to apply the non-  
30 pharmacological package of care in a future feasibility RCT.  
31  
32  
33  
34  
35  
36  
37  
38  
39  
40  
41  
42  
43  
44  
45  
46  
47  
48

## 49 LEGENDS

50  
51  
52  
53 **Figure 1.** Agreement between nurse-rated and video-rated methods for the  
54 components of the intervention. Values shown are % agreement and error bars  
55 indicate the 95% CI  
56  
57  
58  
59  
60

## CONTRIBUTORS

PAN, MH, AF, BM, RO, AV, RdN, MD, DAW, and AA contributed to the design and conception of the study. PAN conducted the quantitative and qualitative data collection and analysis. MH was the independent rater for video assessment of fidelity. AF and RdN provided guidance in the qualitative data collection and analysis. RO, AA and MH provided guidance in the quantitative analysis. BM contributed to the study set up and recruitment. PAN wrote the first draft. PAN, MH, AF, BM, RO, AV, RdN, MD, DAW, and AA have read, provided critical feedback and approved the final manuscript. PAN has access to qualitative and quantitative data and vouches to the accuracy of data analysis.

## COMPETING INTEREST STATEMENTS

All authors declare no competing interests.

## FUNDING STATEMENT

This work was supported and cofunded by the NIHR Nottingham Biomedical Research Centre and the Pain Centre Versus Arthritis (Internal funding 2017-2022). The views expressed are those of author(s) and not necessarily those of the NHS, the NIHR or the Department of Health and Social Care. The study is sponsored by the University of Nottingham, UK.

## DATA STATEMENT SECTION

TIDieR checklist, and interview topic guides have been included as supplementary files. Quantitative fidelity checklists are included as supplementary files in the published protocol. Please email the corresponding author at [Polykarpos.nomikos@nottingham.ac.uk](mailto:Polykarpos.nomikos@nottingham.ac.uk) whether further information is required.

## ETHICS APPROVAL

The study received ethical approval by the East Midlands-Derby Research Ethics Committee (REC) (18/EM/0288).

## PATIENT CONSENT

Obtained

## REFERENCES

1. Jinks C, Jordan K, Ong B, et al. A brief screening tool for knee pain in primary care (KNEST). 2. Results from a survey in the general population aged 50 and over. *Rheumatology* 2004;43(1):55-61.
2. NICE. National Institute for Health and Care Excellence. Osteoarthritis: care and management, 2014.
3. Egerton T, Nelligan RK, Setchell J, et al. General practitioners' views on managing knee osteoarthritis: a thematic analysis of factors influencing clinical practice guideline implementation in primary care. *BMC rheumatology* 2018;2(1):30.
4. Porcheret M, Jordan K, Jinks C, et al. Primary care treatment of knee pain—a survey in older adults. *Rheumatology* 2007;46(11):1694-700.
5. Doherty M, Jenkins W, Richardson H, et al. Efficacy and cost-effectiveness of nurse-led care involving education and engagement of patients and a treat-to-target urate-lowering strategy versus usual care for gout: a randomised controlled trial. *The Lancet* 2018;392(10156):1403-12.
6. Saffi MAL, Polanczyk CA, Rabelo-Silva ER. Lifestyle interventions reduce cardiovascular risk in patients with coronary artery disease: A randomized clinical trial. *European Journal of Cardiovascular Nursing* 2014;13(5):436-43. doi: 10.1177/1474515113505396
7. Strömberg A, Mårtensson J, Fridlund B, et al. Nurse-led heart failure clinics improve survival and self-care behaviour in patients with heart failure: results from a prospective, randomised trial. *European heart journal* 2003;24(11):1014-23.
8. Welch G, Garb J, Zagarins S, et al. Nurse diabetes case management interventions and blood glucose control: Results of a meta-analysis. *Diabetes Research and Clinical Practice* 2010;88(1):1-6.
9. Allen JD, Linnan LA, Emmons KM, et al. Fidelity and its relationship to implementation effectiveness, adaptation, and dissemination. *Dissemination and implementation research in health: Translating science to practice* 2012:281-304.
10. Carroll C, Patterson M, Wood S, et al. A conceptual framework for implementation fidelity. *Implementation Science* 2007;2(1):40. doi: 10.1186/1748-5908-2-40
11. Moncher FJ, Prinz RJ. Treatment fidelity in outcome studies. *Clinical psychology review* 1991;11(3):247-66.
12. Colditz GA, Emmons KM. The promise and challenges of dissemination and implementation research. *Dissemination and implementation research in health: Translating science to practice* 2012:3-22.
13. Borrelli B. The assessment, monitoring, and enhancement of treatment fidelity in public health clinical trials. *Journal of public health dentistry* 2011;71:S52-S63.
14. Walker MF, Hoffmann TC, Brady MC, et al. Improving the development, monitoring and reporting of stroke rehabilitation research: Consensus-based core recommendations from the Stroke Recovery and Rehabilitation Roundtable. *International Journal of Stroke* 2017;12(5):472-79.
15. Bellg AJ, Borrelli B, Resnick B, et al. Enhancing treatment fidelity in health behavior change studies: best practices and recommendations from the NIH Behavior Change Consortium. *Health Psychology* 2004;23(5):443.
16. French SD, Green SE, Francis JJ, et al. Evaluation of the fidelity of an interactive face-to-face educational intervention to improve general practitioner management of back pain. *BMJ open* 2015;5(7):e007886.
17. Jobe JB. Cognitive psychology and self-reports: models and methods. *Quality of Life Research* 2003;12(3):219-27.
18. Schulte AC, Easton JE, Parker J. Advances in treatment integrity research: Multidisciplinary perspectives on the conceptualization, measurement, and enhancement of treatment integrity. *School Psychology Review* 2009;38(4)
19. Huijg JM, Dusseldorp E, Gebhardt WA, et al. Factors associated with physical therapists' implementation of physical activity interventions in the Netherlands. *Physical therapy* 2015;95(4):539-57.

20. McKenna JW, Flower A, Ciullo S. Measuring fidelity to improve intervention effectiveness. *Intervention in School and Clinic* 2014;50(1):15-21.
21. Toomey E, Matthews J, Guerin S, et al. Development of a feasible implementation Fidelity protocol within a complex physical therapy-led self-management intervention. *Physical therapy* 2016;96(8):1287-98.
22. Toomey E, Matthews J, Hurley DA. Using mixed methods to assess fidelity of delivery and its influencing factors in a complex self-management intervention for people with osteoarthritis and low back pain. *BMJ open* 2017;7(8):e015452.
23. Craig P, Dieppe P, Macintyre S, et al. Developing and evaluating complex interventions: the new Medical Research Council guidance. *Bmj* 2008;337:a1655.
24. Farmer T, Robinson K, Elliott SJ, et al. Developing and implementing a triangulation protocol for qualitative health research. *Qualitative health research* 2006;16(3):377-94.
25. Moore GF, Audrey S, Barker M, et al. Process evaluation of complex interventions: Medical Research Council guidance. *BMJ : British Medical Journal* 2015;350:h1258. doi: 10.1136/bmj.h1258
26. Hall M, Fuller A, Nomikos PA, et al. East Midlands knee pain multiple randomised controlled trial cohort study: cohort establishment and feasibility study protocol. *BMJ Open* 2020;10(9):e037760. doi: 10.1136/bmjopen-2020-037760
27. FLICK U. AN INTRODUCTION TO QUALITATIVE RESEARCH. 5 ed. London SAGE Publications Ltd 2014.
28. Millar B, McWilliams DF, Abhishek A, et al. Investigating musculoskeletal health and wellbeing; a cohort study protocol. *BMC musculoskeletal disorders* 2020;21(1):1-10.
29. Bellamy N. WOMAC Osteoarthritis Index User Guide, vol. 5. *Brisbane, Australia* 2002
30. Hoffmann TC, Glasziou PP, Boutron I, et al. Better reporting of interventions: template for intervention description and replication (TIDieR) checklist and guide. *Bmj* 2014;348
31. Michie S, Rumsey N, Fussell A, et al. Improving health: changing behaviour. NHS health trainer handbook. 2008
32. Walton H, Spector A, Roberts A, et al. Developing strategies to improve fidelity of delivery of, and engagement with, a complex intervention to improve independence in dementia: a mixed methods study. *BMC Medical Research Methodology* 2020;20(1):1-19.
33. Ang K, Hepgul N, Gao W, et al. Strategies used in improving and assessing the level of reporting of implementation fidelity in randomised controlled trials of palliative care complex interventions: A systematic review. *Palliative medicine* 2018;32(2):500-16.
34. Borrelli B, Sepinwall D, Ernst D, et al. A new tool to assess treatment fidelity and evaluation of treatment fidelity across 10 years of health behavior research. *Journal of consulting and clinical psychology* 2005;73(5):852.
35. Thomas DR. A General Inductive Approach for Analyzing Qualitative Evaluation Data. *American Journal of Evaluation* 2006;27(2):237-46. doi: 10.1177/1098214005283748
36. Ogrinc G, Davies L, Goodman D, et al. SQUIRE 2.0 (Standards for Quality Improvement Reporting Excellence): revised publication guidelines from a detailed consensus process. *BMJ quality & safety* 2016;25(12):986-92. doi: 10.1136/bmjqs-2015-004411 [published Online First: 2015/09/16]
37. McHugh ML. Interrater reliability: the kappa statistic. *Biochem Med (Zagreb)* 2012;22(3):276-82.
38. Williams SL, McSharry J, Taylor C, et al. Translating a walking intervention for health professional delivery within primary care: A mixed-methods treatment fidelity assessment. *British Journal of Health Psychology* 2020;25(1):17-38. doi: <https://doi.org/10.1111/bjhp.12392>
39. Hardeman W, Michie S, Fanshawe T, et al. Fidelity of delivery of a physical activity intervention: predictors and consequences. *Psychology and Health* 2008;23(1):11-24.



1  
2  
3 40. Radford K, Sutton CJ, Sach T, et al. Early, specialist vocational rehabilitation to  
4 facilitate return to work after traumatic brain injury: the FRESH feasibility RCT.  
5 *Health technology assessment* 2018;22(33):1-156.  
6  
7  
8  
9  
10  
11  
12  
13  
14  
15  
16  
17  
18  
19  
20  
21  
22  
23  
24  
25  
26  
27  
28  
29  
30  
31  
32  
33  
34  
35  
36  
37  
38  
39  
40  
41  
42  
43  
44  
45  
46  
47  
48  
49  
50  
51  
52  
53  
54  
55  
56  
57  
58  
59  
60

For peer review only



view only

1  
2  
3  
4  
5  
6  
7  
8  
9  
10  
11  
12  
13  
14  
15  
16  
17  
18  
19  
20  
21  
22  
23  
24  
25  
26  
27  
28  
29  
30  
31  
32  
33  
34  
35  
36  
37  
38  
39  
40  
41  
42  
43  
44  
45  
46

Additional file 1. Items of the non-pharmacological intervention (TIDieR checklist)

|                              |                                                                                                                                                                                                                                                                                                                                                                                                                                                                                                                                                                                                                                                                                                                                                                                                                                                                                                                                                                                                                                                                                           |
|------------------------------|-------------------------------------------------------------------------------------------------------------------------------------------------------------------------------------------------------------------------------------------------------------------------------------------------------------------------------------------------------------------------------------------------------------------------------------------------------------------------------------------------------------------------------------------------------------------------------------------------------------------------------------------------------------------------------------------------------------------------------------------------------------------------------------------------------------------------------------------------------------------------------------------------------------------------------------------------------------------------------------------------------------------------------------------------------------------------------------------|
| <b>1. Brief name</b>         | Non-pharmacological complex intervention comprised of education, exercise, and weight loss advice if required.                                                                                                                                                                                                                                                                                                                                                                                                                                                                                                                                                                                                                                                                                                                                                                                                                                                                                                                                                                            |
| <b>2. Aims and Rationale</b> | Development and evaluation of the non-pharmacological treatment component.                                                                                                                                                                                                                                                                                                                                                                                                                                                                                                                                                                                                                                                                                                                                                                                                                                                                                                                                                                                                                |
| <b>3. What was done?</b>     | <p><b>Training package of the provider:</b> The content of the package was based on NICE guidelines for the management of OA and a report by Arthritis Research UK on the educational needs of health professionals working with people with OA. The content consisted of a standardised treatment manual. Academic and clinical experts and members of a patient advisory group have provided input into the training package. Their key components were:</p> <ul style="list-style-type: none"> <li>• The epidemiology and nature of knee pain and knee OA</li> <li>• Assessment of the patient with knee OA</li> <li>• Core NICE guidelines for managing OA</li> <li>• Principles of strengthening and aerobic exercise prescription for knee OA</li> <li>• Information and advice to support weight loss</li> <li>• Strategies to support behaviour change</li> <li>• Pharmacological management of OA and knee pain following a step-wise protocol of optimising analgesia</li> </ul> <p><b>Mode of delivery:</b> Four face-to-face individual sessions over a five-week period.</p> |

## Additional file 1. Items of the non-pharmacological intervention (TIDieR checklist)

|                                                                            |                                                                                                                                                                                                                                                                                                                                                                                                             |
|----------------------------------------------------------------------------|-------------------------------------------------------------------------------------------------------------------------------------------------------------------------------------------------------------------------------------------------------------------------------------------------------------------------------------------------------------------------------------------------------------|
| <b>4. Who delivered the intervention ?</b>                                 | A trained nurse with no prior knowledge of treating musculoskeletal conditions delivered the non-pharmacological intervention to knee pain people. A rheumatologist and research physiotherapist delivered in total eight sessions of the module over a three-month period.                                                                                                                                 |
| <b>5. Where was the intervention provided?</b>                             | Single centre research setting, clinic room, city hospital, Nottingham                                                                                                                                                                                                                                                                                                                                      |
| <b>6. When and how often or how much of the intervention was provided?</b> | The complex intervention was delivered for up to 1.5 hours in session one and 46 minutes in the follow up sessions. The nurse was endeavoured to provide as much intervention as an individual could tolerate. The amount of the intervention was video recorded.                                                                                                                                           |
| <b>7. Was the intervention tailored?</b>                                   | Tailoring was built in the intervention. Functional goals were agreed between the nurse and people with knee pain to facilitate exercise prescription. Weight loss goals were agreed with participants who were overweight. The description of the treatment manual highlights procedures for tailoring practice activities. No modifications of the intervention were made during the course of the study. |
| <b>8. How well was the intervention delivered?</b>                         | A single research nurse who received training, delivered the intervention and fidelity was assessed by video recording all sessions. After preliminary fidelity analysis, the nurse received additional supervised training to deliver the intervention.                                                                                                                                                    |

Additional file 2. The semi-structured interview guide for the nurse

## **Nurse's views on experience of delivering the non-pharmacological intervention**

We're going to start by discussing your overall views on the knee pain treatment programme, the training you received to deliver it, and then talk about the different components of the intervention separately.

1. Can you tell me what your overall impression of the knee pain treatment programme is, having delivered it for the first time?

### **Nurse's view of the training received to deliver the non-pharmacological intervention**

We are now going to discuss the training you received to deliver this treatment.

2. Can you tell me how you found the training you received
  - Length of training/ number of sessions/ delivery over weeks rather than 2 days condensed
  - Material covered in sessions: too much/too little/about right
  - Opportunities to practice/ feedback
  - Resources/ manual/ electronic material (links to videos)/ links to weight loss resources / exercise sheets/ case-studies
3. How did you find following the manual provided?
  - Probe – reasons for it being easy / difficult to follow.
  - What suggestions do you have to modify the manual to make it easier to use in the future?
  - Any suggestions for improving the training
- How confident did you feel about delivering the treatment once you had completed your training?

### **Nurse's views on experience of delivering the non-pharmacological intervention**

We are now going to discuss how you found delivering the treatment to patients.

4. How did you find delivering this treatment to patients?
  - As you know, the treatment package had different components – education on self-managing knee pain, giving the participant exercises, advising them on weight loss, setting individual goals with the participants and assessing patient confidence to achieve goals. How did you find delivering these components?
    - [cover ONE at a time]
    - Education
    - Exercise
    - Weight loss
    - Goal setting

1  
2 Additional file 2. The semi-structured interview guide for the nurse  
3

- 4       ○ Assessing patient confidence to achieve goals  
5       ○ Using the diaries (exercise and weight loss)  
6  
7

8 5. How did you find setting goals with patients?  
9

- 10       ○ Probe - did they actively participate in the discussions?  
11

12 6. How did you find the follow-up sessions with participants and providing feedback on participants'  
13 progress with their exercises and/or weight loss?  
14

- 15       ○ Prompts - patient receipt of advice / feedback (any challenges with patients accepting advice  
16 or adhering to the treatment given)  
17  
18

19 • Were there any components that you found challenging to implement?  
20  
21

- 22       ○ What made it challenging to deliver this component? [cover ONE at a time]  
23       ○ Were there any other components that you found challenging to implement? Why.  
24       ○ What would help support you in delivering this in the future?  
25  
26  
27

28 • Were any aspects of the intervention not delivered as planned?  
29  
30

- 31       ○ What were the barriers to delivering [the aspect]? [cover ONE at a time]  
32       ○ What would help support you in delivering this in the future?  
33  
34  
35  
36  
37

38 We are now going to talk about tailoring the treatment to each patient.  
39

40 7. How did you find the final session with the participants? Did you feel that they would be able to  
41 continue with the advice/exercises/weight loss etc independently?  
42  
43  
44

45 We'd now like to discuss the resources provided to support you delivery the treatment programme.  
46  
47

48 8. How useful did you find the other resources during the treatment programme?  
49

- 50       ○ Probe - handouts / training manuals / thera-bands / exercise sheets/ exercise diaries/ NHS  
51 weight loss resource (BMI and weigh loss calculator)/ food diaries/ other weight-loss hand  
52 outs  
53       ○ What suggestions do you have to improve these resources in the future?  
54  
55  
56  
57  
58  
59  
60

1  
2 Additional file 2. The semi-structured interview guide for the nurse  
3

4 9. Is there any additional support you need in being able to deliver this treatment?  
5  
6  
7

8 **We have come to the end of the interview. Do you have any further comments about the training**  
9 **and/or treatment package that have not been covered?**  
10  
11  
12  
13  
14  
15  
16  
17  
18  
19  
20  
21  
22  
23  
24  
25  
26  
27  
28  
29  
30  
31  
32  
33  
34  
35  
36  
37  
38  
39  
40  
41  
42  
43  
44  
45  
46  
47  
48  
49  
50  
51  
52  
53  
54  
55  
56  
57  
58  
59  
60

For peer review only

# Reporting checklist for quality improvement study.

Based on the SQUIRE guidelines.

## Instructions to authors

Complete this checklist by entering the page numbers from your manuscript where readers will find each of the items listed below.

Your article may not currently address all the items on the checklist. Please modify your text to include the missing information. If you are certain that an item does not apply, please write "n/a" and provide a short explanation.

Upload your completed checklist as an extra file when you submit to a journal.

In your methods section, say that you used the SQUIRE reporting guidelines, and cite them as:

Ogrinc G, Davies L, Goodman D, Batalden P, Davidoff F, Stevens D. SQUIRE 2.0 (Standards for Quality Improvement Reporting Excellence): revised publication guidelines from a detailed consensus process

|              | Reporting Item                                                                                                                                                                                                                                   | Page Number |
|--------------|--------------------------------------------------------------------------------------------------------------------------------------------------------------------------------------------------------------------------------------------------|-------------|
| <b>Title</b> | <p><a href="#">#1</a> Indicate that the manuscript concerns an initiative to improve healthcare (broadly defined to include the quality, safety, effectiveness, patientcenteredness, timeliness, cost, efficiency, and equity of healthcare)</p> | 1           |



## Abstract

- [#02a](#) Provide adequate information to aid in searching and indexing 3
- [#02b](#) Summarize all key information from various sections of the text using the abstract format of the intended publication or a structured summary such as: background, local problem, methods, interventions, results, conclusions 2,3

## Introduction

- Problem description** [#3](#) Nature and significance of the local problem 4
- Available knowledge** [#4](#) Summary of what is currently known about the problem, including relevant previous studies 4,5
- Rationale** [#5](#) Informal or formal frameworks, models, concepts, and / or theories used to explain the problem, any reasons or assumptions that were used to develop the intervention(s), and reasons why the intervention(s) was expected to work 7, 9

- Specific aims** [#6](#) Purpose of the project and of this report 6

## Methods

|    |                 |                      |                                                  |         |
|----|-----------------|----------------------|--------------------------------------------------|---------|
| 1  | Context         | <a href="#">#7</a>   | Contextual elements considered important at      | 7       |
| 2  |                 |                      | the outset of introducing the intervention(s)    |         |
| 3  |                 |                      |                                                  |         |
| 4  |                 |                      |                                                  |         |
| 5  |                 |                      |                                                  |         |
| 6  | Intervention(s) | <a href="#">#08a</a> | Description of the intervention(s) in sufficient | 8,9     |
| 7  |                 |                      | detail that others could reproduce it            |         |
| 8  |                 |                      |                                                  |         |
| 9  |                 |                      |                                                  |         |
| 10 |                 |                      |                                                  |         |
| 11 | Intervention(s) | <a href="#">#08b</a> | Specifics of the team involved in the work       | 11      |
| 12 |                 |                      |                                                  |         |
| 13 |                 |                      |                                                  |         |
| 14 |                 |                      |                                                  |         |
| 15 | Study of the    | <a href="#">#09a</a> | Approach chosen for assessing the impact of      | 9,10,11 |
| 16 |                 |                      | the intervention(s)                              |         |
| 17 | Intervention(s) |                      |                                                  |         |
| 18 |                 |                      |                                                  |         |
| 19 |                 |                      |                                                  |         |
| 20 | Study of the    | <a href="#">#09b</a> | Approach used to establish whether the           | 12      |
| 21 |                 |                      | observed outcomes were due to the                |         |
| 22 | Intervention(s) |                      | intervention(s)                                  |         |
| 23 |                 |                      |                                                  |         |
| 24 |                 |                      |                                                  |         |
| 25 |                 |                      |                                                  |         |
| 26 |                 |                      |                                                  |         |
| 27 |                 |                      |                                                  |         |
| 28 | Measures        | <a href="#">#10a</a> | Measures chosen for studying processes           | 4,5,7   |
| 29 |                 |                      | and outcomes of the intervention(s),             |         |
| 30 |                 |                      | including rationale for choosing them, their     |         |
| 31 |                 |                      | operational definitions, and their validity and  |         |
| 32 |                 |                      | reliability                                      |         |
| 33 |                 |                      |                                                  |         |
| 34 |                 |                      |                                                  |         |
| 35 |                 |                      |                                                  |         |
| 36 |                 |                      |                                                  |         |
| 37 |                 |                      |                                                  |         |
| 38 |                 |                      |                                                  |         |
| 39 |                 |                      |                                                  |         |
| 40 | Measures        | <a href="#">#10b</a> | Description of the approach to the ongoing       | 11,12   |
| 41 |                 |                      | assessment of contextual elements that           |         |
| 42 |                 |                      | contributed to the success, failure, efficiency, |         |
| 43 |                 |                      | and cost                                         |         |
| 44 |                 |                      |                                                  |         |
| 45 |                 |                      |                                                  |         |
| 46 |                 |                      |                                                  |         |
| 47 |                 |                      |                                                  |         |
| 48 |                 |                      |                                                  |         |
| 49 |                 |                      |                                                  |         |
| 50 | Measures        | <a href="#">#10c</a> | Methods employed for assessing                   | 11,12   |
| 51 |                 |                      | completeness and accuracy of data                |         |
| 52 |                 |                      |                                                  |         |
| 53 |                 |                      |                                                  |         |
| 54 |                 |                      |                                                  |         |
| 55 | Analysis        | <a href="#">#11a</a> | Qualitative and quantitative methods used to     | 8,9,10  |
| 56 |                 |                      | draw inferences from the data                    |         |
| 57 |                 |                      |                                                  |         |
| 58 |                 |                      |                                                  |         |
| 59 |                 |                      |                                                  |         |
| 60 |                 |                      |                                                  |         |

|    |                        |                                              |                                                |           |
|----|------------------------|----------------------------------------------|------------------------------------------------|-----------|
| 1  | Analysis               | <a href="#">#11b</a>                         | Methods for understanding variation within     | 12, 21-23 |
| 2  |                        |                                              |                                                |           |
| 3  |                        |                                              |                                                |           |
| 4  |                        |                                              | the data, including the effects of time as a   |           |
| 5  |                        |                                              |                                                |           |
| 6  |                        |                                              | variable                                       |           |
| 7  |                        |                                              |                                                |           |
| 8  | Ethical considerations | <a href="#">#12</a>                          | Ethical aspects of implementing and studying   | 9, 31     |
| 9  |                        |                                              |                                                |           |
| 10 |                        |                                              |                                                |           |
| 11 |                        |                                              | the intervention(s) and how they were          |           |
| 12 |                        |                                              |                                                |           |
| 13 |                        |                                              | addressed, including, but not limited to,      |           |
| 14 |                        |                                              |                                                |           |
| 15 |                        |                                              | formal ethics review and potential conflict(s) |           |
| 16 |                        |                                              |                                                |           |
| 17 |                        |                                              | of interest                                    |           |
| 18 |                        |                                              |                                                |           |
| 19 | Results                | <a href="#">#13a</a>                         | Initial steps of the intervention(s) and their | 7,8,11    |
| 20 |                        |                                              |                                                |           |
| 21 |                        |                                              |                                                |           |
| 22 |                        |                                              | evolution over time (e.g., time-line diagram,  |           |
| 23 |                        |                                              |                                                |           |
| 24 |                        |                                              | flow chart, or table), including modifications |           |
| 25 |                        |                                              |                                                |           |
| 26 |                        |                                              | made to the intervention during the project    |           |
| 27 |                        |                                              |                                                |           |
| 28 |                        |                                              |                                                |           |
| 29 |                        |                                              |                                                |           |
| 30 |                        |                                              |                                                |           |
| 31 |                        |                                              |                                                |           |
| 32 |                        |                                              |                                                |           |
| 33 |                        |                                              |                                                |           |
| 34 |                        |                                              |                                                |           |
| 35 | <a href="#">#13b</a>   | Details of the process measures and          | 9-12                                           |           |
| 36 |                        | outcome                                      |                                                |           |
| 37 |                        |                                              |                                                |           |
| 38 |                        |                                              |                                                |           |
| 39 |                        |                                              |                                                |           |
| 40 | <a href="#">#13c</a>   | Contextual elements that interacted with the | n/a (the intervention was<br>fully monitored)  |           |
| 41 |                        | intervention(s)                              |                                                |           |
| 42 |                        |                                              |                                                |           |
| 43 |                        |                                              |                                                |           |
| 44 |                        |                                              |                                                |           |
| 45 |                        |                                              |                                                |           |
| 46 | <a href="#">#13d</a>   | Observed associations between outcomes,      | 13,14                                          |           |
| 47 |                        | interventions, and relevant contextual       |                                                |           |
| 48 |                        | elements                                     |                                                |           |
| 49 |                        |                                              |                                                |           |
| 50 |                        |                                              |                                                |           |
| 51 |                        |                                              |                                                |           |
| 52 |                        |                                              |                                                |           |
| 53 |                        |                                              |                                                |           |
| 54 | <a href="#">#13e</a>   | Unintended consequences such as              | 13,14, 18-20                                   |           |
| 55 |                        | unexpected benefits, problems, failures, or  |                                                |           |
| 56 |                        | costs associated with the intervention(s).   |                                                |           |
| 57 |                        |                                              |                                                |           |
| 58 |                        |                                              |                                                |           |
| 59 |                        |                                              |                                                |           |
| 60 |                        |                                              |                                                |           |

|    |                   |                      |                                             |                                |
|----|-------------------|----------------------|---------------------------------------------|--------------------------------|
| 1  |                   | <a href="#">#13f</a> | Details about missing data                  | n/a (no missing data)          |
| 2  |                   |                      |                                             |                                |
| 3  |                   |                      |                                             |                                |
| 4  |                   |                      |                                             |                                |
| 5  |                   |                      |                                             |                                |
| 6  |                   |                      |                                             |                                |
| 7  |                   |                      |                                             |                                |
| 8  |                   |                      |                                             |                                |
| 9  |                   |                      |                                             |                                |
| 10 | <b>Discussion</b> |                      |                                             |                                |
| 11 |                   |                      |                                             |                                |
| 12 |                   |                      |                                             |                                |
| 13 |                   |                      |                                             |                                |
| 14 | Summary           | <a href="#">#14a</a> | Key findings, including relevance to the    | 24                             |
| 15 |                   |                      | rationale and specific aims                 |                                |
| 16 |                   |                      |                                             |                                |
| 17 |                   |                      |                                             |                                |
| 18 |                   |                      |                                             |                                |
| 19 | Summary           | <a href="#">#14b</a> | Particular strengths of the project         | 26,27                          |
| 20 |                   |                      |                                             |                                |
| 21 |                   |                      |                                             |                                |
| 22 | Interpretation    | <a href="#">#15a</a> | Nature of the association between the       | 24,25                          |
| 23 |                   |                      | intervention(s) and the outcomes            |                                |
| 24 |                   |                      |                                             |                                |
| 25 |                   |                      |                                             |                                |
| 26 |                   |                      |                                             |                                |
| 27 | Interpretation    | <a href="#">#15b</a> | Comparison of results with findings from    | 25,26                          |
| 28 |                   |                      | other publications                          |                                |
| 29 |                   |                      |                                             |                                |
| 30 |                   |                      |                                             |                                |
| 31 |                   |                      |                                             |                                |
| 32 |                   |                      |                                             |                                |
| 33 | Interpretation    | <a href="#">#15c</a> | Impact of the project on people and systems | n/a (the project determined    |
| 34 |                   |                      |                                             | if it is feasible to apply the |
| 35 |                   |                      |                                             | non-pharmacological            |
| 36 |                   |                      |                                             | intervention in a feasibility  |
| 37 |                   |                      |                                             | RCT)                           |
| 38 |                   |                      |                                             |                                |
| 39 |                   |                      |                                             |                                |
| 40 |                   |                      |                                             |                                |
| 41 |                   |                      |                                             |                                |
| 42 |                   |                      |                                             |                                |
| 43 |                   |                      |                                             |                                |
| 44 |                   |                      |                                             |                                |
| 45 | Interpretation    | <a href="#">#15d</a> | Reasons for any differences between         | 26                             |
| 46 |                   |                      | observed and anticipated outcomes,          |                                |
| 47 |                   |                      | including the influence of context          |                                |
| 48 |                   |                      |                                             |                                |
| 49 |                   |                      |                                             |                                |
| 50 |                   |                      |                                             |                                |
| 51 |                   |                      |                                             |                                |
| 52 |                   |                      |                                             |                                |
| 53 | Interpretation    | <a href="#">#15e</a> | Costs and strategic trade-offs, including   | n/a (The study did not         |
| 54 |                   |                      | opportunity costs                           | assess cost-effectiveness)     |
| 55 |                   |                      |                                             |                                |
| 56 |                   |                      |                                             |                                |
| 57 |                   |                      |                                             |                                |
| 58 | Limitations       | <a href="#">#16a</a> | Limits to the generalizability of the work  | 26,27                          |
| 59 |                   |                      |                                             |                                |
| 60 |                   |                      |                                             |                                |

|    |                    |                      |                                                 |        |
|----|--------------------|----------------------|-------------------------------------------------|--------|
| 1  | Limitations        | <a href="#">#16b</a> | Factors that might have limited internal        | 26     |
| 2  |                    |                      | validity such as confounding, bias, or          |        |
| 3  |                    |                      | imprecision in the design, methods,             |        |
| 4  |                    |                      | measurement, or analysis                        |        |
| 5  |                    |                      |                                                 |        |
| 6  |                    |                      |                                                 |        |
| 7  |                    |                      |                                                 |        |
| 8  |                    |                      |                                                 |        |
| 9  |                    |                      |                                                 |        |
| 10 |                    |                      |                                                 |        |
| 11 | Limitations        | <a href="#">#16c</a> | Efforts made to minimize and adjust for         | 26     |
| 12 |                    |                      | limitations                                     |        |
| 13 |                    |                      |                                                 |        |
| 14 |                    |                      |                                                 |        |
| 15 |                    |                      |                                                 |        |
| 16 | Conclusion         | <a href="#">#17a</a> | Usefulness of the work                          | 24, 27 |
| 17 |                    |                      |                                                 |        |
| 18 |                    |                      |                                                 |        |
| 19 | Conclusion         | <a href="#">#17b</a> | Sustainability                                  | 27     |
| 20 |                    |                      |                                                 |        |
| 21 |                    |                      |                                                 |        |
| 22 | Conclusion         | <a href="#">#17c</a> | Potential for spread to other contexts          | 26,27  |
| 23 |                    |                      |                                                 |        |
| 24 |                    |                      |                                                 |        |
| 25 | Conclusion         | <a href="#">#17d</a> | Implications for practice and for further study | 25,26  |
| 26 |                    |                      | in the field                                    |        |
| 27 |                    |                      |                                                 |        |
| 28 |                    |                      |                                                 |        |
| 29 |                    |                      |                                                 |        |
| 30 | Conclusion         | <a href="#">#17e</a> | Suggested next steps                            | 27     |
| 31 |                    |                      |                                                 |        |
| 32 |                    |                      |                                                 |        |
| 33 |                    |                      |                                                 |        |
| 34 | <b>Other</b>       |                      |                                                 |        |
| 35 | <b>information</b> |                      |                                                 |        |
| 36 |                    |                      |                                                 |        |
| 37 |                    |                      |                                                 |        |
| 38 |                    |                      |                                                 |        |
| 39 | Funding            | <a href="#">#18</a>  | Sources of funding that supported this work.    | 31     |
| 40 |                    |                      | Role, if any, of the funding organization in    |        |
| 41 |                    |                      | the design, implementation, interpretation,     |        |
| 42 |                    |                      | and reporting                                   |        |
| 43 |                    |                      |                                                 |        |
| 44 |                    |                      |                                                 |        |
| 45 |                    |                      |                                                 |        |
| 46 |                    |                      |                                                 |        |
| 47 |                    |                      |                                                 |        |
| 48 |                    |                      |                                                 |        |

## Notes:

- 52
- 53 • 13c: n/a (the intervention was fully monitored)
- 54
- 55
- 56 • 13f: n/a (no missing data as all intervention sessions were video recorded)
- 57
- 58
- 59

- 1 • 15c: n/a (the project determined if it is feasible to apply the non-pharmacological intervention in a  
2 feasibility RCT)  
3  
4  
5
- 6 • 15e: n/a (The study did not consider cost-effectiveness) The SQUIRE 2.0 checklist is distributed  
7 under the terms of the Creative Commons Attribution License CC BY-NC 4.0. This checklist was  
8 completed on 22. September 2020 using <https://www.goodreports.org/>, a tool made by the  
9  
10  
11  
12 [EQUATOR Network](#) in collaboration with [Penelope.ai](#)  
13  
14  
15  
16  
17  
18  
19  
20  
21  
22  
23  
24  
25  
26  
27  
28  
29  
30  
31  
32  
33  
34  
35  
36  
37  
38  
39  
40  
41  
42  
43  
44  
45  
46  
47  
48  
49  
50  
51  
52  
53  
54  
55  
56  
57  
58  
59  
60
